# Supplementary material for: DNA profiling and assessment of genetic diversity of relict species Allium altaicum Pall. on the territory of Altai
Source: PeerJ. 2021 Jan 8;9:e10674. doi: 10.7717/peerj.10674 (PMC7798630; doi:10.7717/peerj.10674)
Supplement: Supplemental Information 1 [file peerj-09-10674-s001.xlsx]

## Sheet: data
165	12	4	3	2	5	2	1	12
Random binary data with XY coords			South Altay	Leninogorsk	Kalbinskii Altay	West Altay		Region1
Sample	Pop	Locus1	Locus2	Locus3	Locus4	Locus5	Locus6	Locus7	Locus8	Locus9	Locus10	Locus11	Locus12	Locus13	Locus14	Locus15	Locus16	Locus17	Locus18	Locus19	Locus20	Locus21	Locus22	Locus23	Locus24	Locus25	Locus26	Locus27	Locus28	Locus29	Locus30	Locus31	Locus32	Locus33	Locus34	Locus35	Locus36	Locus37	Locus38	Locus39	Locus40	Locus41	Locus42	Locus43	Locus44	Locus45	Locus46	Locus47	Locus48
Al 1	South Altay	0	0	1	1	1	1	0	0	0	1	0	0	0	0	0	0	0	0	1	0	0	0	0	0	0	0	0	0	0	0	1	1	0	0	0	1	1	0	1	0	0	1	1	1	0	1	0	1
Al 9	West Altay	1	0	1	0	1	1	0	1	0	0	0	0	1	1	1	1	0	1	1	0	0	0	0	0	0	0	0	0	1	1	0	1	1	1	0	1	0	1	1	1	0	1	0	1	0	0	0	1
Al 13	South Altay	0	1	0	1	1	1	0	1	0	0	0	1	1	1	1	1	0	0	1	0	0	0	0	0	0	0	0	1	0	0	1	1	1	0	0	0	0	0	1	0	0	1	0	1	1	1	0	1
Al 10	West Altay	1	1	0	1	1	1	0	1	0	0	0	0	1	1	1	1	0	1	1	0	0	0	0	0	1	0	0	0	1	0	0	1	0	1	0	1	1	0	1	0	0	1	1	1	0	0	0	1
Al 11	Kalbinskii Altay	0	0	0	0	1	1	0	1	0	0	0	0	0	1	1	1	1	1	1	0	0	0	0	0	1	0	0	0	1	0	0	1	0	0	0	0	0	0	1	1	0	1	0	1	1	1	0	1
Al 15	Kalbinskii Altay	1	0	1	1	1	1	0	1	0	1	1	0	1	1	1	0	1	1	1	0	0	1	0	1	1	0	0	0	1	0	0	1	1	1	0	0	0	0	1	1	0	1	1	0	1	1	0	1
Al 2	Kalbinskii Altay	1	1	1	1	1	1	0	1	0	0	0	0	1	1	1	1	0	1	1	1	0	1	1	0	1	0	0	0	0	0	0	1	0	0	1	1	1	1	1	1	0	1	1	1	0	0	0	1
Al 17	Kalbinskii Altay	0	0	0	0	1	1	1	1	0	0	0	0	1	1	1	0	1	0	1	0	0	1	0	0	0	1	0	0	1	0	1	1	0	0	1	0	0	1	1	0	0	1	1	0	0	0	1	1
Al 8	Kalbinskii Altay	0	1	0	0	1	1	1	1	0	0	0	0	1	0	1	0	0	0	1	1	0	1	0	0	0	0	0	0	0	0	1	1	0	1	1	0	0	1	1	1	0	1	1	1	1	0	0	1
Al 12	Leninogorsk	1	0	1	1	1	1	0	1	0	0	0	0	1	1	0	0	1	1	1	1	0	0	1	0	0	1	0	0	1	1	0	1	1	0	0	0	0	0	1	0	0	1	0	1	1	1	0	1
Al 14	Leninogorsk	1	0	1	0	1	1	0	1	0	0	1	0	1	0	1	0	1	0	1	0	0	1	0	0	0	0	0	0	1	0	1	1	1	0	0	1	0	0	1	1	0	1	0	1	0	1	0	1
Al 16	South Altay	1	0	0	1	1	1	0	1	0	0	0	0	1	0	0	0	1	0	1	0	0	1	0	0	1	1	0	0	1	0	1	1	1	1	0	1	0	0	1	0	0	1	1	1	1	1	0	1
[truncated: 119 more columns]

## Sheet: GD
1	12	3	4	4	4	1	12
Random binary data with XY coords	D (2)	Binary Distance	South Altay	Southwest Altay	West Altay
Al 1	Al 9	Al 13	Al 10	Al 11	Al 15	Al 2	Al 17	Al 8	Al 12	Al 14	Al 16
0												Al 1
50	0											Al 9
33	35	0										Al 13
39	29	28	0									Al 10
36	28	19	21	0								Al 11
49	35	34	26	23	0							Al 15
55	51	54	46	51	52	0						Al 2
62	66	61	61	62	69	73	0					Al 17
46	36	35	37	36	41	45	60	0				Al 8
47	41	36	34	29	32	52	73	51	0			Al 12
41	33	28	32	27	28	54	61	37	38	0		Al 14
40	36	31	27	26	21	51	68	38	27	27	0	Al 16

## Sheet: PCoA
Principal Coordinates Analysis (PCoA)		3	4	4	4
PCoA via Covariance matrix with data standardization			South Altay	Southwest Altay	West Altay
Data Sheet	GD
Data Title	Random binary data with XY coords
No. Samples	12	No. Pops.	3
Percentage of variation explained by the first 3 axes
Axis	1	2	3
%	21.349	15.1268	11.9301
Cum %	21.349	36.4759	48.406
Eigen Values by Axis and Sample Eigen Vectors
Axis No.	1	2	3	4	5	6	7	8	9	10	11
EigenValue	14.7514	10.4521	8.24327	7.78366	5.68852	4.79119	4.65362	4.43153	3.15903	2.9104	2.23162
Al 1	0.501066	-0.322449	2.32692	-0.116028	0.0139876	-0.319563	0.286125	0.80956	-0.250194	-0.252164	-0.0765467
Al 9	-0.333791	0.167824	-0.97434	-0.969444	1.29501	0.0820145	0.914696	0.719474	-0.359814	0.286646	-0.13758
Al 13	-0.256713	-0.633027	0.707343	-0.627619	0.30121	0.356092	-0.322398	-1.25728	-0.110355	0.698307	-0.615392
Al 10	-0.422999	-0.0604322	-0.182958	-0.0447914	0.737414	-0.813358	-0.886933	0.284122	1.19919	-0.185994	-0.162525
Al 11	-0.649442	-0.530051	0.0639411	-0.182607	0.568463	-0.093642	-0.488362	-0.574121	-0.499397	-0.318587	1.11623
Al 15	-0.984426	-0.253478	-0.801909	0.473594	-0.656146	-0.795276	-0.446335	0.114365	-0.901981	-0.451085	-0.592101
Al 2	0.63832	2.76754	0.189952	0.585459	0.0706857	-0.38066	0.16825	-0.503884	-0.0939139	0.153214	0.0743273
Al 17	3.19997	-0.998446	-0.709628	0.687885	0.0521753	0.00276577	-0.0712128	-0.0219312	-0.0536207	0.0823252	0.0272245
Al 8	0.511588	0.736508	-0.290318	-1.5553	-0.92838	0.990543	-0.651319	0.366391	0.104288	-0.360409	0.0211695
Al 12	-0.957842	-0.0676394	0.0383118	1.57344	0.350809	1.39923	0.202323	0.0724445	0.221984	-0.443683	-0.165706
Al 14	-0.348232	-0.548197	-0.236274	-0.387064	-0.880344	-0.41051	1.37886	-0.66048	0.60135	-0.400295	0.113193
Al 16	-0.897501	-0.258156	-0.131045	0.562476	-0.924883	-0.0176361	-0.08369	0.651333	0.142464	1.19173	0.397707

## Sheet: PhiPT
Results of Analysis of Molecular Variance
Input as Binary Distance Matrix for Calculation of PhiPT
Data Sheet	D (2)
Data Title	Random binary data with XY coords
No. Samples	12
No. Pops	4
No. Regions	1
No. Permutations	999
N0	2.83333
SSTOT	229.167
Pop	South Altay	Leninogorsk	Kalbinskii Altay	West Altay
n	3	2	5	2
SSWP	39.3333	10.5	109.6	13.5
Summary AMOVA Table
Source	df	SS	MS	Est. Var.	%
Among Pops	3	56.2333	18.7444	0	0
Within Pops	8	172.933	21.6167	21.6167	1
Total	11	229.167		21.6167	1
Stat	Value	P(rand >= data)
PhiPT	-0.049203	0.817
PhiPT max	0.740004
Phi'PT	-0.0664902
Probability, P(rand >= data), for PhiPT is based on standard permutation across the full data set.
PhiPT = AP / (WP + AP) = AP / TOT
Key: AP = Est. Var. Among Pops, WP = Est. Var. Within Pops
Warning! Negative Among Pops. Est. Var. of -1,014 converted to zero for pie chart presentation!

## Sheet: BAFP (2)
Band Frequencies, Estimated Allele Frequencies and Estimated Heterozygosity by Pop for Binary (Diploid) Data
Data Sheet	D (2)
Data Title	Random binary data with XY coords
No. Loci	165
No. Samples	12
No. Pops.	4
Band Frequency, Estimated Allele Frequency (p & q), Samples Size, No. Alleles, No. Effective Alleles, Information Index, Expected and Unbiased Expected Heterozygosity
Pop	Locus	Band Freq.	p	q	N	Na	Ne	I	He	uHe
South Altay	Locus1	0.33333	0.183503	0.816497	3	2	1.42788	0.476665	0.29966	0.359592
	Locus2	0.33333	0.183503	0.816497	3	2	1.42788	0.476665	0.29966	0.359592
	Locus3	0.66667	0.42265	0.57735	3	2	1.95325	0.681133	0.488034	0.585641
	Locus4	0.66667	0.42265	0.57735	3	2	1.95325	0.681133	0.488034	0.585641
	Locus5	1	1	0	3	1	1	0	0	0
	Locus6	1	1	0	3	1	1	0	0	0
	Locus7	0	0	1	3	0	1	0	0	0
	Locus8	0.66667	0.42265	0.57735	3	2	1.95325	0.681133	0.488034	0.585641
	Locus9	0	0	1	3	0	1	0	0	0
	Locus10	0.33333	0.183503	0.816497	3	2	1.42788	0.476665	0.29966	0.359592
	Locus11	0	0	1	3	0	1	0	0	0
	Locus12	0.33333	0.183503	0.816497	3	2	1.42788	0.476665	0.29966	0.359592
	Locus13	0.66667	0.42265	0.57735	3	2	1.95325	0.681133	0.488034	0.585641
	Locus14	0.66667	0.42265	0.57735	3	2	1.95325	0.681133	0.488034	0.585641
	Locus15	0.66667	0.42265	0.57735	3	2	1.95325	0.681133	0.488034	0.585641
	Locus16	0.66667	0.42265	0.57735	3	2	1.95325	0.681133	0.488034	0.585641
	Locus17	0	0	1	3	0	1	0	0	0
	Locus18	0.33333	0.183503	0.816497	3	2	1.42788	0.476665	0.29966	0.359592
	Locus19	1	1	0	3	1	1	0	0	0
	Locus20	0	0	1	3	0	1	0	0	0
	Locus21	0	0	1	3	0	1	0	0	0
	Locus22	0	0	1	3	0	1	0	0	0
	Locus23	0	0	1	3	0	1	0	0	0
	Locus24	0	0	1	3	0	1	0	0	0
	Locus25	0	0	1	3	0	1	0	0	0
	Locus26	0	0	1	3	0	1	0	0	0
	Locus27	0	0	1	3	0	1	0	0	0
	Locus28	0.33333	0.183503	0.816497	3	2	1.42788	0.476665	0.29966	0.359592
	Locus29	0.33333	0.183503	0.816497	3	2	1.42788	0.476665	0.29966	0.359592
	Locus30	0.33333	0.183503	0.816497	3	2	1.42788	0.476665	0.29966	0.359592
	Locus31	0.66667	0.42265	0.57735	3	2	1.95325	0.681133	0.488034	0.585641
	Locus32	1	1	0	3	1	1	0	0	0
	Locus33	0.66667	0.42265	0.57735	3	2	1.95325	0.681133	0.488034	0.585641
	Locus34	0.33333	0.183503	0.816497	3	2	1.42788	0.476665	0.29966	0.359592
	Locus35	0	0	1	3	0	1	0	0	0
	Locus36	0.66667	0.42265	0.57735	3	2	1.95325	0.681133	0.488034	0.585641
	Locus37	0.33333	0.183503	0.816497	3	2	1.42788	0.476665	0.29966	0.359592
	Locus38	0.33333	0.183503	0.816497	3	2	1.42788	0.476665	0.29966	0.359592
	Locus39	1	1	0	3	1	1	0	0	0
	Locus40	0.33333	0.183503	0.816497	3	2	1.42788	0.476665	0.29966	0.359592
	Locus41	0	0	1	3	0	1	0	0	0
	Locus42	1	1	0	3	1	1	0	0	0
	Locus43	0.33333	0.183503	0.816497	3	2	1.42788	0.476665	0.29966	0.359592
	Locus44	1	1	0	3	1	1	0	0	0
	Locus45	0.33333	0.183503	0.816497	3	2	1.42788	0.476665	0.29966	0.359592
	Locus46	0.66667	0.42265	0.57735	3	2	1.95325	0.681133	0.488034	0.585641
	Locus47	0	0	1	3	0	1	0	0	0
	Locus48	1	1	0	3	1	1	0	0	0
	Locus49	0	0	1	3	0	1	0	0	0
	Locus50	1	1	0	3	1	1	0	0	0
	Locus51	0	0	1	3	0	1	0	0	0
	Locus52	0	0	1	3	0	1	0	0	0
	Locus53	0.33333	0.183503	0.816497	3	2	1.42788	0.476665	0.29966	0.359592
	Locus54	0	0	1	3	0	1	0	0	0
	Locus55	1	1	0	3	1	1	0	0	0
	Locus56	1	1	0	3	1	1	0	0	0
	Locus57	0.66667	0.42265	0.57735	3	2	1.95325	0.681133	0.488034	0.585641
	Locus58	1	1	0	3	1	1	0	0	0
	Locus59	0.66667	0.42265	0.57735	3	2	1.95325	0.681133	0.488034	0.585641
	Locus60	0.66667	0.42265	0.57735	3	2	1.95325	0.681133	0.488034	0.585641
	Locus61	0	0	1	3	0	1	0	0	0
	Locus62	1	1	0	3	1	1	0	0	0
	Locus63	0	0	1	3	0	1	0	0	0
	Locus64	0	0	1	3	0	1	0	0	0
	Locus65	0	0	1	3	0	1	0	0	0
	Locus66	1	1	0	3	1	1	0	0	0
	Locus67	0	0	1	3	0	1	0	0	0
	Locus68	0.66667	0.42265	0.57735	3	2	1.95325	0.681133	0.488034	0.585641
	Locus69	0	0	1	3	0	1	0	0	0
	Locus70	1	1	0	3	1	1	0	0	0
	Locus71	0	0	1	3	0	1	0	0	0
	Locus72	1	1	0	3	1	1	0	0	0
	Locus73	1	1	0	3	1	1	0	0	0
	Locus74	0	0	1	3	0	1	0	0	0
	Locus75	0	0	1	3	0	1	0	0	0
	Locus76	0	0	1	3	0	1	0	0	0
	Locus77	0	0	1	3	0	1	0	0	0
	Locus78	0	0	1	3	0	1	0	0	0
	Locus79	1	1	0	3	1	1	0	0	0
	Locus80	0	0	1	3	0	1	0	0	0
	Locus81	0.33333	0.183503	0.816497	3	2	1.42788	0.476665	0.29966	0.359592
	Locus82	0.66667	0.42265	0.57735	3	2	1.95325	0.681133	0.488034	0.585641
	Locus83	0.33333	0.183503	0.816497	3	2	1.42788	0.476665	0.29966	0.359592
	Locus84	0.33333	0.183503	0.816497	3	2	1.42788	0.476665	0.29966	0.359592
	Locus85	0.33333	0.183503	0.816497	3	2	1.42788	0.476665	0.29966	0.359592
	Locus86	0	0	1	3	0	1	0	0	0
	Locus87	0	0	1	3	0	1	0	0	0
	Locus88	0.33333	0.183503	0.816497	3	2	1.42788	0.476665	0.29966	0.359592
	Locus89	0.66667	0.42265	0.57735	3	2	1.95325	0.681133	0.488034	0.585641
	Locus90	0	0	1	3	0	1	0	0	0
	Locus91	1	1	0	3	1	1	0	0	0
	Locus92	0.66667	0.42265	0.57735	3	2	1.95325	0.681133	0.488034	0.585641
	Locus93	0	0	1	3	0	1	0	0	0
	Locus94	0	0	1	3	0	1	0	0	0
	Locus95	0.66667	0.42265	0.57735	3	2	1.95325	0.681133	0.488034	0.585641
	Locus96	0	0	1	3	0	1	0	0	0
	Locus97	0	0	1	3	0	1	0	0	0
	Locus98	0.66667	0.42265	0.57735	3	2	1.95325	0.681133	0.488034	0.585641
	Locus99	0.33333	0.183503	0.816497	3	2	1.42788	0.476665	0.29966	0.359592
	Locus100	0.66667	0.42265	0.57735	3	2	1.95325	0.681133	0.488034	0.585641
	Locus101	0	0	1	3	0	1	0	0	0
	Locus102	0	0	1	3	0	1	0	0	0
	Locus103	0	0	1	3	0	1	0	0	0
	Locus104	0.33333	0.183503	0.816497	3	2	1.42788	0.476665	0.29966	0.359592
	Locus105	0	0	1	3	0	1	0	0	0
	Locus106	0	0	1	3	0	1	0	0	0
	Locus107	0	0	1	3	0	1	0	0	0
	Locus108	0	0	1	3	0	1	0	0	0
	Locus109	0.66667	0.42265	0.57735	3	2	1.95325	0.681133	0.488034	0.585641
	Locus110	0.33333	0.183503	0.816497	3	2	1.42788	0.476665	0.29966	0.359592
	Locus111	0	0	1	3	0	1	0	0	0
	Locus112	0	0	1	3	0	1	0	0	0
	Locus113	0	0	1	3	0	1	0	0	0
	Locus114	0	0	1	3	0	1	0	0	0
	Locus115	0.33333	0.183503	0.816497	3	2	1.42788	0.476665	0.29966	0.359592
	Locus116	1	1	0	3	1	1	0	0	0
	Locus117	0	0	1	3	0	1	0	0	0
	Locus118	0	0	1	3	0	1	0	0	0
	Locus119	0	0	1	3	0	1	0	0	0
	Locus120	0	0	1	3	0	1	0	0	0
	Locus121	0	0	1	3	0	1	0	0	0
	Locus122	1	1	0	3	1	1	0	0	0
	Locus123	0	0	1	3	0	1	0	0	0
	Locus124	0.66667	0.42265	0.57735	3	2	1.95325	0.681133	0.488034	0.585641
	Locus125	1	1	0	3	1	1	0	0	0
	Locus126	1	1	0	3	1	1	0	0	0
	Locus127	0	0	1	3	0	1	0	0	0
	Locus128	0.33333	0.183503	0.816497	3	2	1.42788	0.476665	0.29966	0.359592
	Locus129	1	1	0	3	1	1	0	0	0
	Locus130	0.33333	0.183503	0.816497	3	2	1.42788	0.476665	0.29966	0.359592
	Locus131	1	1	0	3	1	1	0	0	0
	Locus132	1	1	0	3	1	1	0	0	0
	Locus133	0.33333	0.183503	0.816497	3	2	1.42788	0.476665	0.29966	0.359592
	Locus134	0	0	1	3	0	1	0	0	0
	Locus135	0	0	1	3	0	1	0	0	0
	Locus136	0	0	1	3	0	1	0	0	0
	Locus137	1	1	0	3	1	1	0	0	0
	Locus138	1	1	0	3	1	1	0	0	0
	Locus139	0.66667	0.42265	0.57735	3	2	1.95325	0.681133	0.488034	0.585641
	Locus140	0.66667	0.42265	0.57735	3	2	1.95325	0.681133	0.488034	0.585641
	Locus141	1	1	0	3	1	1	0	0	0
	Locus142	0	0	1	3	0	1	0	0	0
	Locus143	0	0	1	3	0	1	0	0	0
	Locus144	1	1	0	3	1	1	0	0	0
	Locus145	0.66667	0.42265	0.57735	3	2	1.95325	0.681133	0.488034	0.585641
	Locus146	0	0	1	3	0	1	0	0	0
	Locus147	0.33333	0.183503	0.816497	3	2	1.42788	0.476665	0.29966	0.359592
	Locus148	1	1	0	3	1	1	0	0	0
	Locus149	1	1	0	3	1	1	0	0	0
	Locus150	0.66667	0.42265	0.57735	3	2	1.95325	0.681133	0.488034	0.585641
	Locus151	0.33333	0.183503	0.816497	3	2	1.42788	0.476665	0.29966	0.359592
	Locus152	1	1	0	3	1	1	0	0	0
	Locus153	0	0	1	3	0	1	0	0	0
	Locus154	0	0	1	3	0	1	0	0	0
	Locus155	0	0	1	3	0	1	0	0	0
	Locus156	0.33333	0.183503	0.816497	3	2	1.42788	0.476665	0.29966	0.359592
	Locus157	0.33333	0.183503	0.816497	3	2	1.42788	0.476665	0.29966	0.359592
	Locus158	0	0	1	3	0	1	0	0	0
	Locus159	0	0	1	3	0	1	0	0	0
	Locus160	0.33333	0.183503	0.816497	3	2	1.42788	0.476665	0.29966	0.359592
	Locus161	0	0	1	3	0	1	0	0	0
	Locus162	0	0	1	3	0	1	0	0	0
	Locus163	0	0	1	3	0	1	0	0	0
	Locus164	1	1	0	3	1	1	0	0	0
	Locus165	0	0	1	3	0	1	0	0	0
Leninogorsk	Locus1	0.5	0.292893	0.707107	2	2	1.70711	0.604722	0.414214	0.552285
	Locus2	0.5	0.292893	0.707107	2	2	1.70711	0.604722	0.414214	0.552285
	Locus3	0	0	1	2	0	1	0	0	0
	Locus4	0.5	0.292893	0.707107	2	2	1.70711	0.604722	0.414214	0.552285
	Locus5	1	1	0	2	1	1	0	0	0
	Locus6	1	1	0	2	1	1	0	0	0
	Locus7	0	0	1	2	0	1	0	0	0
	Locus8	1	1	0	2	1	1	0	0	0
	Locus9	0	0	1	2	0	1	0	0	0
	Locus10	0	0	1	2	0	1	0	0	0
	Locus11	0	0	1	2	0	1	0	0	0
	Locus12	0	0	1	2	0	1	0	0	0
	Locus13	0.5	0.292893	0.707107	2	2	1.70711	0.604722	0.414214	0.552285
	Locus14	1	1	0	2	1	1	0	0	0
	Locus15	1	1	0	2	1	1	0	0	0
	Locus16	1	1	0	2	1	1	0	0	0
	Locus17	0.5	0.292893	0.707107	2	2	1.70711	0.604722	0.414214	0.552285
	Locus18	1	1	0	2	1	1	0	0	0
	Locus19	1	1	0	2	1	1	0	0	0
	Locus20	0	0	1	2	0	1	0	0	0
	Locus21	0	0	1	2	0	1	0	0	0
	Locus22	0	0	1	2	0	1	0	0	0
	Locus23	0	0	1	2	0	1	0	0	0
	Locus24	0	0	1	2	0	1	0	0	0
	Locus25	1	1	0	2	1	1	0	0	0
	Locus26	0	0	1	2	0	1	0	0	0
	Locus27	0	0	1	2	0	1	0	0	0
	Locus28	0	0	1	2	0	1	0	0	0
	Locus29	1	1	0	2	1	1	0	0	0
	Locus30	0	0	1	2	0	1	0	0	0
	Locus31	0	0	1	2	0	1	0	0	0
	Locus32	1	1	0	2	1	1	0	0	0
	Locus33	0	0	1	2	0	1	0	0	0
	Locus34	0.5	0.292893	0.707107	2	2	1.70711	0.604722	0.414214	0.552285
	Locus35	0	0	1	2	0	1	0	0	0
	Locus36	0.5	0.292893	0.707107	2	2	1.70711	0.604722	0.414214	0.552285
	Locus37	0.5	0.292893	0.707107	2	2	1.70711	0.604722	0.414214	0.552285
	Locus38	0	0	1	2	0	1	0	0	0
	Locus39	1	1	0	2	1	1	0	0	0
	Locus40	0.5	0.292893	0.707107	2	2	1.70711	0.604722	0.414214	0.552285
	Locus41	0	0	1	2	0	1	0	0	0
	Locus42	1	1	0	2	1	1	0	0	0
	Locus43	0.5	0.292893	0.707107	2	2	1.70711	0.604722	0.414214	0.552285
	Locus44	1	1	0	2	1	1	0	0	0
	Locus45	0.5	0.292893	0.707107	2	2	1.70711	0.604722	0.414214	0.552285
	Locus46	0.5	0.292893	0.707107	2	2	1.70711	0.604722	0.414214	0.552285
	Locus47	0	0	1	2	0	1	0	0	0
	Locus48	1	1	0	2	1	1	0	0	0
	Locus49	0	0	1	2	0	1	0	0	0
	Locus50	1	1	0	2	1	1	0	0	0
	Locus51	0	0	1	2	0	1	0	0	0
	Locus52	0	0	1	2	0	1	0	0	0
	Locus53	0	0	1	2	0	1	0	0	0
	Locus54	0	0	1	2	0	1	0	0	0
	Locus55	1	1	0	2	1	1	0	0	0
	Locus56	1	1	0	2	1	1	0	0	0
	Locus57	1	1	0	2	1	1	0	0	0
	Locus58	1	1	0	2	1	1	0	0	0
	Locus59	1	1	0	2	1	1	0	0	0
	Locus60	0	0	1	2	0	1	0	0	0
	Locus61	0	0	1	2	0	1	0	0	0
	Locus62	1	1	0	2	1	1	0	0	0
	Locus63	0	0	1	2	0	1	0	0	0
	Locus64	0	0	1	2	0	1	0	0	0
	Locus65	0	0	1	2	0	1	0	0	0
	Locus66	1	1	0	2	1	1	0	0	0
	Locus67	0	0	1	2	0	1	0	0	0
	Locus68	1	1	0	2	1	1	0	0	0
	Locus69	0	0	1	2	0	1	0	0	0
	Locus70	1	1	0	2	1	1	0	0	0
	Locus71	0	0	1	2	0	1	0	0	0
	Locus72	1	1	0	2	1	1	0	0	0
	Locus73	1	1	0	2	1	1	0	0	0
	Locus74	0	0	1	2	0	1	0	0	0
	Locus75	0	0	1	2	0	1	0	0	0
	Locus76	0	0	1	2	0	1	0	0	0
	Locus77	0	0	1	2	0	1	0	0	0
	Locus78	0	0	1	2	0	1	0	0	0
	Locus79	1	1	0	2	1	1	0	0	0
	Locus80	0	0	1	2	0	1	0	0	0
	Locus81	1	1	0	2	1	1	0	0	0
	Locus82	1	1	0	2	1	1	0	0	0
	Locus83	0.5	0.292893	0.707107	2	2	1.70711	0.604722	0.414214	0.552285
	Locus84	0	0	1	2	0	1	0	0	0
	Locus85	0	0	1	2	0	1	0	0	0
	Locus86	0	0	1	2	0	1	0	0	0
	Locus87	0.5	0.292893	0.707107	2	2	1.70711	0.604722	0.414214	0.552285
	Locus88	0	0	1	2	0	1	0	0	0
	Locus89	1	1	0	2	1	1	0	0	0
	Locus90	0	0	1	2	0	1	0	0	0
	Locus91	1	1	0	2	1	1	0	0	0
	Locus92	1	1	0	2	1	1	0	0	0
	Locus93	0	0	1	2	0	1	0	0	0
	Locus94	0	0	1	2	0	1	0	0	0
	Locus95	1	1	0	2	1	1	0	0	0
	Locus96	0	0	1	2	0	1	0	0	0
	Locus97	0	0	1	2	0	1	0	0	0
	Locus98	0.5	0.292893	0.707107	2	2	1.70711	0.604722	0.414214	0.552285
	Locus99	0	0	1	2	0	1	0	0	0
	Locus100	0	0	1	2	0	1	0	0	0
	Locus101	0	0	1	2	0	1	0	0	0
	Locus102	0	0	1	2	0	1	0	0	0
	Locus103	0	0	1	2	0	1	0	0	0
	Locus104	0	0	1	2	0	1	0	0	0
	Locus105	0	0	1	2	0	1	0	0	0
	Locus106	0	0	1	2	0	1	0	0	0
	Locus107	0	0	1	2	0	1	0	0	0
	Locus108	0	0	1	2	0	1	0	0	0
	Locus109	1	1	0	2	1	1	0	0	0
	Locus110	0	0	1	2	0	1	0	0	0
	Locus111	0	0	1	2	0	1	0	0	0
	Locus112	0	0	1	2	0	1	0	0	0
	Locus113	0	0	1	2	0	1	0	0	0
	Locus114	0	0	1	2	0	1	0	0	0
	Locus115	0	0	1	2	0	1	0	0	0
	Locus116	1	1	0	2	1	1	0	0	0
	Locus117	0	0	1	2	0	1	0	0	0
	Locus118	0	0	1	2	0	1	0	0	0
	Locus119	0	0	1	2	0	1	0	0	0
	Locus120	0	0	1	2	0	1	0	0	0
	Locus121	0	0	1	2	0	1	0	0	0
	Locus122	1	1	0	2	1	1	0	0	0
	Locus123	0	0	1	2	0	1	0	0	0
	Locus124	0.5	0.292893	0.707107	2	2	1.70711	0.604722	0.414214	0.552285
	Locus125	1	1	0	2	1	1	0	0	0
	Locus126	1	1	0	2	1	1	0	0	0
	Locus127	0	0	1	2	0	1	0	0	0
	Locus128	1	1	0	2	1	1	0	0	0
	Locus129	1	1	0	2	1	1	0	0	0
	Locus130	1	1	0	2	1	1	0	0	0
	Locus131	1	1	0	2	1	1	0	0	0
	Locus132	1	1	0	2	1	1	0	0	0
	Locus133	0.5	0.292893	0.707107	2	2	1.70711	0.604722	0.414214	0.552285
	Locus134	0.5	0.292893	0.707107	2	2	1.70711	0.604722	0.414214	0.552285
	Locus135	0	0	1	2	0	1	0	0	0
	Locus136	0	0	1	2	0	1	0	0	0
	Locus137	0.5	0.292893	0.707107	2	2	1.70711	0.604722	0.414214	0.552285
	Locus138	1	1	0	2	1	1	0	0	0
	Locus139	1	1	0	2	1	1	0	0	0
	Locus140	1	1	0	2	1	1	0	0	0
	Locus141	1	1	0	2	1	1	0	0	0
	Locus142	0	0	1	2	0	1	0	0	0
	Locus143	0	0	1	2	0	1	0	0	0
	Locus144	0.5	0.292893	0.707107	2	2	1.70711	0.604722	0.414214	0.552285
	Locus145	0	0	1	2	0	1	0	0	0
	Locus146	0	0	1	2	0	1	0	0	0
	Locus147	0	0	1	2	0	1	0	0	0
	Locus148	1	1	0	2	1	1	0	0	0
	Locus149	1	1	0	2	1	1	0	0	0
	Locus150	0	0	1	2	0	1	0	0	0
	Locus151	0	0	1	2	0	1	0	0	0
	Locus152	1	1	0	2	1	1	0	0	0
	Locus153	0	0	1	2	0	1	0	0	0
	Locus154	0	0	1	2	0	1	0	0	0
	Locus155	0	0	1	2	0	1	0	0	0
	Locus156	0	0	1	2	0	1	0	0	0
	Locus157	0	0	1	2	0	1	0	0	0
	Locus158	0	0	1	2	0	1	0	0	0
	Locus159	0	0	1	2	0	1	0	0	0
	Locus160	0.5	0.292893	0.707107	2	2	1.70711	0.604722	0.414214	0.552285
	Locus161	0	0	1	2	0	1	0	0	0
	Locus162	0	0	1	2	0	1	0	0	0
	Locus163	0	0	1	2	0	1	0	0	0
	Locus164	1	1	0	2	1	1	0	0	0
	Locus165	0	0	1	2	0	1	0	0	0
Kalbinskii Altay	Locus1	0.6	0.367544	0.632456	5	2	1.86885	0.657636	0.464911	0.516568
	Locus2	0.4	0.225403	0.774597	5	2	1.53655	0.533662	0.349193	0.387993
	Locus3	0.6	0.367544	0.632456	5	2	1.86885	0.657636	0.464911	0.516568
	Locus4	0.6	0.367544	0.632456	5	2	1.86885	0.657636	0.464911	0.516568
	Locus5	1	1	0	5	1	1	0	0	0
	Locus6	1	1	0	5	1	1	0	0	0
	Locus7	0.4	0.225403	0.774597	5	2	1.53655	0.533662	0.349193	0.387993
	Locus8	1	1	0	5	1	1	0	0	0
	Locus9	0	0	1	5	0	1	0	0	0
	Locus10	0.2	0.105573	0.894427	5	2	1.23282	0.337158	0.188854	0.209838
	Locus11	0.2	0.105573	0.894427	5	2	1.23282	0.337158	0.188854	0.209838
	Locus12	0	0	1	5	0	1	0	0	0
	Locus13	1	1	0	5	1	1	0	0	0
	Locus14	0.8	0.552786	0.447214	5	2	1.97795	0.687564	0.494427	0.549364
	Locus15	0.8	0.552786	0.447214	5	2	1.97795	0.687564	0.494427	0.549364
	Locus16	0.2	0.105573	0.894427	5	2	1.23282	0.337158	0.188854	0.209838
	Locus17	0.6	0.367544	0.632456	5	2	1.86885	0.657636	0.464911	0.516568
	Locus18	0.6	0.367544	0.632456	5	2	1.86885	0.657636	0.464911	0.516568
	Locus19	1	1	0	5	1	1	0	0	0
	Locus20	0.6	0.367544	0.632456	5	2	1.86885	0.657636	0.464911	0.516568
	Locus21	0	0	1	5	0	1	0	0	0
	Locus22	0.8	0.552786	0.447214	5	2	1.97795	0.687564	0.494427	0.549364
	Locus23	0.4	0.225403	0.774597	5	2	1.53655	0.533662	0.349193	0.387993
	Locus24	0.2	0.105573	0.894427	5	2	1.23282	0.337158	0.188854	0.209838
	Locus25	0.4	0.225403	0.774597	5	2	1.53655	0.533662	0.349193	0.387993
	Locus26	0.4	0.225403	0.774597	5	2	1.53655	0.533662	0.349193	0.387993
	Locus27	0	0	1	5	0	1	0	0	0
	Locus28	0	0	1	5	0	1	0	0	0
	Locus29	0.6	0.367544	0.632456	5	2	1.86885	0.657636	0.464911	0.516568
	Locus30	0.2	0.105573	0.894427	5	2	1.23282	0.337158	0.188854	0.209838
	Locus31	0.4	0.225403	0.774597	5	2	1.53655	0.533662	0.349193	0.387993
	Locus32	1	1	0	5	1	1	0	0	0
	Locus33	0.4	0.225403	0.774597	5	2	1.53655	0.533662	0.349193	0.387993
	Locus34	0.4	0.225403	0.774597	5	2	1.53655	0.533662	0.349193	0.387993
	Locus35	0.6	0.367544	0.632456	5	2	1.86885	0.657636	0.464911	0.516568
	Locus36	0.2	0.105573	0.894427	5	2	1.23282	0.337158	0.188854	0.209838
	Locus37	0.2	0.105573	0.894427	5	2	1.23282	0.337158	0.188854	0.209838
	Locus38	0.6	0.367544	0.632456	5	2	1.86885	0.657636	0.464911	0.516568
	Locus39	1	1	0	5	1	1	0	0	0
	Locus40	0.6	0.367544	0.632456	5	2	1.86885	0.657636	0.464911	0.516568
	Locus41	0	0	1	5	0	1	0	0	0
	Locus42	1	1	0	5	1	1	0	0	0
	Locus43	0.8	0.552786	0.447214	5	2	1.97795	0.687564	0.494427	0.549364
	Locus44	0.6	0.367544	0.632456	5	2	1.86885	0.657636	0.464911	0.516568
	Locus45	0.6	0.367544	0.632456	5	2	1.86885	0.657636	0.464911	0.516568
	Locus46	0.4	0.225403	0.774597	5	2	1.53655	0.533662	0.349193	0.387993
	Locus47	0.2	0.105573	0.894427	5	2	1.23282	0.337158	0.188854	0.209838
	Locus48	1	1	0	5	1	1	0	0	0
	Locus49	0.6	0.367544	0.632456	5	2	1.86885	0.657636	0.464911	0.516568
	Locus50	0.2	0.105573	0.894427	5	2	1.23282	0.337158	0.188854	0.209838
	Locus51	0.2	0.105573	0.894427	5	2	1.23282	0.337158	0.188854	0.209838
	Locus52	0	0	1	5	0	1	0	0	0
	Locus53	0	0	1	5	0	1	0	0	0
	Locus54	0.2	0.105573	0.894427	5	2	1.23282	0.337158	0.188854	0.209838
	Locus55	1	1	0	5	1	1	0	0	0
	Locus56	1	1	0	5	1	1	0	0	0
	Locus57	0.4	0.225403	0.774597	5	2	1.53655	0.533662	0.349193	0.387993
	Locus58	1	1	0	5	1	1	0	0	0
	Locus59	0.8	0.552786	0.447214	5	2	1.97795	0.687564	0.494427	0.549364
	Locus60	0.4	0.225403	0.774597	5	2	1.53655	0.533662	0.349193	0.387993
	Locus61	0	0	1	5	0	1	0	0	0
	Locus62	1	1	0	5	1	1	0	0	0
	Locus63	0.2	0.105573	0.894427	5	2	1.23282	0.337158	0.188854	0.209838
	Locus64	0	0	1	5	0	1	0	0	0
	Locus65	0.4	0.225403	0.774597	5	2	1.53655	0.533662	0.349193	0.387993
	Locus66	1	1	0	5	1	1	0	0	0
	Locus67	0.2	0.105573	0.894427	5	2	1.23282	0.337158	0.188854	0.209838
	Locus68	0.8	0.552786	0.447214	5	2	1.97795	0.687564	0.494427	0.549364
	Locus69	0.2	0.105573	0.894427	5	2	1.23282	0.337158	0.188854	0.209838
	Locus70	0.8	0.552786	0.447214	5	2	1.97795	0.687564	0.494427	0.549364
	Locus71	0	0	1	5	0	1	0	0	0
	Locus72	0.8	0.552786	0.447214	5	2	1.97795	0.687564	0.494427	0.549364
	Locus73	0.8	0.552786	0.447214	5	2	1.97795	0.687564	0.494427	0.549364
	Locus74	0.4	0.225403	0.774597	5	2	1.53655	0.533662	0.349193	0.387993
	Locus75	0.2	0.105573	0.894427	5	2	1.23282	0.337158	0.188854	0.209838
	Locus76	0	0	1	5	0	1	0	0	0
	Locus77	0	0	1	5	0	1	0	0	0
	Locus78	0.2	0.105573	0.894427	5	2	1.23282	0.337158	0.188854	0.209838
	Locus79	0.8	0.552786	0.447214	5	2	1.97795	0.687564	0.494427	0.549364
	Locus80	0	0	1	5	0	1	0	0	0
	Locus81	0.8	0.552786	0.447214	5	2	1.97795	0.687564	0.494427	0.549364
	Locus82	0.8	0.552786	0.447214	5	2	1.97795	0.687564	0.494427	0.549364
	Locus83	0.6	0.367544	0.632456	5	2	1.86885	0.657636	0.464911	0.516568
	Locus84	0.4	0.225403	0.774597	5	2	1.53655	0.533662	0.349193	0.387993
	Locus85	0.4	0.225403	0.774597	5	2	1.53655	0.533662	0.349193	0.387993
	Locus86	0	0	1	5	0	1	0	0	0
	Locus87	0.2	0.105573	0.894427	5	2	1.23282	0.337158	0.188854	0.209838
	Locus88	0.2	0.105573	0.894427	5	2	1.23282	0.337158	0.188854	0.209838
	Locus89	0.8	0.552786	0.447214	5	2	1.97795	0.687564	0.494427	0.549364
	Locus90	0.4	0.225403	0.774597	5	2	1.53655	0.533662	0.349193	0.387993
	Locus91	1	1	0	5	1	1	0	0	0
	Locus92	0.6	0.367544	0.632456	5	2	1.86885	0.657636	0.464911	0.516568
	Locus93	0.4	0.225403	0.774597	5	2	1.53655	0.533662	0.349193	0.387993
	Locus94	0.2	0.105573	0.894427	5	2	1.23282	0.337158	0.188854	0.209838
	Locus95	0.6	0.367544	0.632456	5	2	1.86885	0.657636	0.464911	0.516568
	Locus96	0.2	0.105573	0.894427	5	2	1.23282	0.337158	0.188854	0.209838
	Locus97	0.2	0.105573	0.894427	5	2	1.23282	0.337158	0.188854	0.209838
	Locus98	0.2	0.105573	0.894427	5	2	1.23282	0.337158	0.188854	0.209838
	Locus99	0	0	1	5	0	1	0	0	0
	Locus100	0.2	0.105573	0.894427	5	2	1.23282	0.337158	0.188854	0.209838
	Locus101	0.4	0.225403	0.774597	5	2	1.53655	0.533662	0.349193	0.387993
	Locus102	0.2	0.105573	0.894427	5	2	1.23282	0.337158	0.188854	0.209838
	Locus103	0	0	1	5	0	1	0	0	0
	Locus104	0.2	0.105573	0.894427	5	2	1.23282	0.337158	0.188854	0.209838
	Locus105	0	0	1	5	0	1	0	0	0
	Locus106	0.2	0.105573	0.894427	5	2	1.23282	0.337158	0.188854	0.209838
	Locus107	0.2	0.105573	0.894427	5	2	1.23282	0.337158	0.188854	0.209838
	Locus108	0.2	0.105573	0.894427	5	2	1.23282	0.337158	0.188854	0.209838
	Locus109	0.6	0.367544	0.632456	5	2	1.86885	0.657636	0.464911	0.516568
	Locus110	0.2	0.105573	0.894427	5	2	1.23282	0.337158	0.188854	0.209838
	Locus111	0.2	0.105573	0.894427	5	2	1.23282	0.337158	0.188854	0.209838
	Locus112	0	0	1	5	0	1	0	0	0
	Locus113	0	0	1	5	0	1	0	0	0
	Locus114	0	0	1	5	0	1	0	0	0
	Locus115	0	0	1	5	0	1	0	0	0
	Locus116	0.6	0.367544	0.632456	5	2	1.86885	0.657636	0.464911	0.516568
	Locus117	0.2	0.105573	0.894427	5	2	1.23282	0.337158	0.188854	0.209838
	Locus118	0	0	1	5	0	1	0	0	0
	Locus119	0.2	0.105573	0.894427	5	2	1.23282	0.337158	0.188854	0.209838
	Locus120	0	0	1	5	0	1	0	0	0
	Locus121	0.2	0.105573	0.894427	5	2	1.23282	0.337158	0.188854	0.209838
	Locus122	0.8	0.552786	0.447214	5	2	1.97795	0.687564	0.494427	0.549364
	Locus123	0.4	0.225403	0.774597	5	2	1.53655	0.533662	0.349193	0.387993
	Locus124	0.8	0.552786	0.447214	5	2	1.97795	0.687564	0.494427	0.549364
	Locus125	1	1	0	5	1	1	0	0	0
	Locus126	0.8	0.552786	0.447214	5	2	1.97795	0.687564	0.494427	0.549364
	Locus127	0	0	1	5	0	1	0	0	0
	Locus128	0.4	0.225403	0.774597	5	2	1.53655	0.533662	0.349193	0.387993
	Locus129	1	1	0	5	1	1	0	0	0
	Locus130	0.2	0.105573	0.894427	5	2	1.23282	0.337158	0.188854	0.209838
	Locus131	0.8	0.552786	0.447214	5	2	1.97795	0.687564	0.494427	0.549364
	Locus132	1	1	0	5	1	1	0	0	0
	Locus133	0.2	0.105573	0.894427	5	2	1.23282	0.337158	0.188854	0.209838
	Locus134	0.2	0.105573	0.894427	5	2	1.23282	0.337158	0.188854	0.209838
	Locus135	0.2	0.105573	0.894427	5	2	1.23282	0.337158	0.188854	0.209838
	Locus136	0.2	0.105573	0.894427	5	2	1.23282	0.337158	0.188854	0.209838
	Locus137	0	0	1	5	0	1	0	0	0
	Locus138	0.8	0.552786	0.447214	5	2	1.97795	0.687564	0.494427	0.549364
	Locus139	0.6	0.367544	0.632456	5	2	1.86885	0.657636	0.464911	0.516568
	Locus140	0.8	0.552786	0.447214	5	2	1.97795	0.687564	0.494427	0.549364
	Locus141	0.6	0.367544	0.632456	5	2	1.86885	0.657636	0.464911	0.516568
	Locus142	0.2	0.105573	0.894427	5	2	1.23282	0.337158	0.188854	0.209838
	Locus143	0.4	0.225403	0.774597	5	2	1.53655	0.533662	0.349193	0.387993
	Locus144	0.4	0.225403	0.774597	5	2	1.53655	0.533662	0.349193	0.387993
	Locus145	0	0	1	5	0	1	0	0	0
	Locus146	0.2	0.105573	0.894427	5	2	1.23282	0.337158	0.188854	0.209838
	Locus147	0.2	0.105573	0.894427	5	2	1.23282	0.337158	0.188854	0.209838
	Locus148	1	1	0	5	1	1	0	0	0
	Locus149	1	1	0	5	1	1	0	0	0
	Locus150	0.4	0.225403	0.774597	5	2	1.53655	0.533662	0.349193	0.387993
	Locus151	0.2	0.105573	0.894427	5	2	1.23282	0.337158	0.188854	0.209838
	Locus152	0.8	0.552786	0.447214	5	2	1.97795	0.687564	0.494427	0.549364
	Locus153	0.2	0.105573	0.894427	5	2	1.23282	0.337158	0.188854	0.209838
	Locus154	0.4	0.225403	0.774597	5	2	1.53655	0.533662	0.349193	0.387993
	Locus155	0.2	0.105573	0.894427	5	2	1.23282	0.337158	0.188854	0.209838
	Locus156	0.4	0.225403	0.774597	5	2	1.53655	0.533662	0.349193	0.387993
	Locus157	0	0	1	5	0	1	0	0	0
	Locus158	0	0	1	5	0	1	0	0	0
	Locus159	0	0	1	5	0	1	0	0	0
	Locus160	0.6	0.367544	0.632456	5	2	1.86885	0.657636	0.464911	0.516568
	Locus161	0.2	0.105573	0.894427	5	2	1.23282	0.337158	0.188854	0.209838
	Locus162	0.2	0.105573	0.894427	5	2	1.23282	0.337158	0.188854	0.209838
	Locus163	0.2	0.105573	0.894427	5	2	1.23282	0.337158	0.188854	0.209838
	Locus164	1	1	0	5	1	1	0	0	0
	Locus165	0.2	0.105573	0.894427	5	2	1.23282	0.337158	0.188854	0.209838
West Altay	Locus1	1	1	0	2	1	1	0	0	0
	Locus2	0	0	1	2	0	1	0	0	0
	Locus3	0.5	0.292893	0.707107	2	2	1.70711	0.604722	0.414214	0.552285
	Locus4	0.5	0.292893	0.707107	2	2	1.70711	0.604722	0.414214	0.552285
	Locus5	1	1	0	2	1	1	0	0	0
	Locus6	1	1	0	2	1	1	0	0	0
	Locus7	0	0	1	2	0	1	0	0	0
	Locus8	1	1	0	2	1	1	0	0	0
	Locus9	0	0	1	2	0	1	0	0	0
	Locus10	0	0	1	2	0	1	0	0	0
	Locus11	0.5	0.292893	0.707107	2	2	1.70711	0.604722	0.414214	0.552285
	Locus12	0	0	1	2	0	1	0	0	0
	Locus13	1	1	0	2	1	1	0	0	0
	Locus14	0	0	1	2	0	1	0	0	0
	Locus15	0.5	0.292893	0.707107	2	2	1.70711	0.604722	0.414214	0.552285
	Locus16	0	0	1	2	0	1	0	0	0
	Locus17	1	1	0	2	1	1	0	0	0
	Locus18	0	0	1	2	0	1	0	0	0
	Locus19	1	1	0	2	1	1	0	0	0
	Locus20	0	0	1	2	0	1	0	0	0
	Locus21	0	0	1	2	0	1	0	0	0
	Locus22	1	1	0	2	1	1	0	0	0
	Locus23	0	0	1	2	0	1	0	0	0
	Locus24	0	0	1	2	0	1	0	0	0
	Locus25	0.5	0.292893	0.707107	2	2	1.70711	0.604722	0.414214	0.552285
	Locus26	0.5	0.292893	0.707107	2	2	1.70711	0.604722	0.414214	0.552285
	Locus27	0	0	1	2	0	1	0	0	0
	Locus28	0	0	1	2	0	1	0	0	0
	Locus29	1	1	0	2	1	1	0	0	0
	Locus30	0	0	1	2	0	1	0	0	0
	Locus31	1	1	0	2	1	1	0	0	0
	Locus32	1	1	0	2	1	1	0	0	0
	Locus33	1	1	0	2	1	1	0	0	0
	Locus34	0.5	0.292893	0.707107	2	2	1.70711	0.604722	0.414214	0.552285
	Locus35	0	0	1	2	0	1	0	0	0
	Locus36	1	1	0	2	1	1	0	0	0
	Locus37	0	0	1	2	0	1	0	0	0
	Locus38	0	0	1	2	0	1	0	0	0
	Locus39	1	1	0	2	1	1	0	0	0
	Locus40	0.5	0.292893	0.707107	2	2	1.70711	0.604722	0.414214	0.552285
	Locus41	0	0	1	2	0	1	0	0	0
	Locus42	1	1	0	2	1	1	0	0	0
	Locus43	0.5	0.292893	0.707107	2	2	1.70711	0.604722	0.414214	0.552285
	Locus44	1	1	0	2	1	1	0	0	0
	Locus45	0.5	0.292893	0.707107	2	2	1.70711	0.604722	0.414214	0.552285
	Locus46	1	1	0	2	1	1	0	0	0
	Locus47	0	0	1	2	0	1	0	0	0
	Locus48	1	1	0	2	1	1	0	0	0
	Locus49	0	0	1	2	0	1	0	0	0
	Locus50	1	1	0	2	1	1	0	0	0
	Locus51	0	0	1	2	0	1	0	0	0
	Locus52	0	0	1	2	0	1	0	0	0
	Locus53	0	0	1	2	0	1	0	0	0
	Locus54	0	0	1	2	0	1	0	0	0
	Locus55	1	1	0	2	1	1	0	0	0
	Locus56	1	1	0	2	1	1	0	0	0
	Locus57	1	1	0	2	1	1	0	0	0
	Locus58	1	1	0	2	1	1	0	0	0
	Locus59	1	1	0	2	1	1	0	0	0
	Locus60	0.5	0.292893	0.707107	2	2	1.70711	0.604722	0.414214	0.552285
	Locus61	0.5	0.292893	0.707107	2	2	1.70711	0.604722	0.414214	0.552285
	Locus62	1	1	0	2	1	1	0	0	0
	Locus63	0	0	1	2	0	1	0	0	0
	Locus64	0	0	1	2	0	1	0	0	0
	Locus65	0	0	1	2	0	1	0	0	0
	Locus66	1	1	0	2	1	1	0	0	0
	Locus67	0	0	1	2	0	1	0	0	0
	Locus68	1	1	0	2	1	1	0	0	0
	Locus69	0	0	1	2	0	1	0	0	0
	Locus70	1	1	0	2	1	1	0	0	0
	Locus71	0	0	1	2	0	1	0	0	0
	Locus72	1	1	0	2	1	1	0	0	0
	Locus73	1	1	0	2	1	1	0	0	0
	Locus74	0	0	1	2	0	1	0	0	0
	Locus75	0	0	1	2	0	1	0	0	0
	Locus76	0	0	1	2	0	1	0	0	0
	Locus77	0	0	1	2	0	1	0	0	0
	Locus78	0	0	1	2	0	1	0	0	0
	Locus79	1	1	0	2	1	1	0	0	0
	Locus80	0	0	1	2	0	1	0	0	0
	Locus81	0.5	0.292893	0.707107	2	2	1.70711	0.604722	0.414214	0.552285
	Locus82	1	1	0	2	1	1	0	0	0
	Locus83	0.5	0.292893	0.707107	2	2	1.70711	0.604722	0.414214	0.552285
	Locus84	0	0	1	2	0	1	0	0	0
	Locus85	1	1	0	2	1	1	0	0	0
	Locus86	0	0	1	2	0	1	0	0	0
	Locus87	0.5	0.292893	0.707107	2	2	1.70711	0.604722	0.414214	0.552285
	Locus88	0	0	1	2	0	1	0	0	0
	Locus89	1	1	0	2	1	1	0	0	0
	Locus90	0	0	1	2	0	1	0	0	0
	Locus91	1	1	0	2	1	1	0	0	0
	Locus92	1	1	0	2	1	1	0	0	0
	Locus93	0	0	1	2	0	1	0	0	0
	Locus94	0	0	1	2	0	1	0	0	0
	Locus95	1	1	0	2	1	1	0	0	0
	Locus96	0	0	1	2	0	1	0	0	0
	Locus97	0	0	1	2	0	1	0	0	0
	Locus98	1	1	0	2	1	1	0	0	0
	Locus99	0.5	0.292893	0.707107	2	2	1.70711	0.604722	0.414214	0.552285
	Locus100	0	0	1	2	0	1	0	0	0
	Locus101	0.5	0.292893	0.707107	2	2	1.70711	0.604722	0.414214	0.552285
	Locus102	0	0	1	2	0	1	0	0	0
	Locus103	0	0	1	2	0	1	0	0	0
	Locus104	0	0	1	2	0	1	0	0	0
	Locus105	0	0	1	2	0	1	0	0	0
	Locus106	0	0	1	2	0	1	0	0	0
	Locus107	0.5	0.292893	0.707107	2	2	1.70711	0.604722	0.414214	0.552285
	Locus108	0	0	1	2	0	1	0	0	0
	Locus109	1	1	0	2	1	1	0	0	0
	Locus110	0	0	1	2	0	1	0	0	0
	Locus111	0	0	1	2	0	1	0	0	0
	Locus112	0	0	1	2	0	1	0	0	0
	Locus113	0	0	1	2	0	1	0	0	0
	Locus114	0	0	1	2	0	1	0	0	0
	Locus115	0	0	1	2	0	1	0	0	0
	Locus116	1	1	0	2	1	1	0	0	0
	Locus117	0	0	1	2	0	1	0	0	0
	Locus118	0	0	1	2	0	1	0	0	0
	Locus119	0	0	1	2	0	1	0	0	0
	Locus120	0	0	1	2	0	1	0	0	0
	Locus121	0	0	1	2	0	1	0	0	0
	Locus122	1	1	0	2	1	1	0	0	0
	Locus123	0.5	0.292893	0.707107	2	2	1.70711	0.604722	0.414214	0.552285
	Locus124	1	1	0	2	1	1	0	0	0
	Locus125	1	1	0	2	1	1	0	0	0
	Locus126	0.5	0.292893	0.707107	2	2	1.70711	0.604722	0.414214	0.552285
	Locus127	0	0	1	2	0	1	0	0	0
	Locus128	0.5	0.292893	0.707107	2	2	1.70711	0.604722	0.414214	0.552285
	Locus129	1	1	0	2	1	1	0	0	0
	Locus130	0	0	1	2	0	1	0	0	0
	Locus131	1	1	0	2	1	1	0	0	0
	Locus132	1	1	0	2	1	1	0	0	0
	Locus133	0	0	1	2	0	1	0	0	0
	Locus134	0.5	0.292893	0.707107	2	2	1.70711	0.604722	0.414214	0.552285
	Locus135	0	0	1	2	0	1	0	0	0
	Locus136	0	0	1	2	0	1	0	0	0
	Locus137	0	0	1	2	0	1	0	0	0
	Locus138	1	1	0	2	1	1	0	0	0
	Locus139	1	1	0	2	1	1	0	0	0
	Locus140	1	1	0	2	1	1	0	0	0
	Locus141	1	1	0	2	1	1	0	0	0
	Locus142	0	0	1	2	0	1	0	0	0
	Locus143	0	0	1	2	0	1	0	0	0
	Locus144	0	0	1	2	0	1	0	0	0
	Locus145	0	0	1	2	0	1	0	0	0
	Locus146	0	0	1	2	0	1	0	0	0
	Locus147	0	0	1	2	0	1	0	0	0
	Locus148	1	1	0	2	1	1	0	0	0
	Locus149	1	1	0	2	1	1	0	0	0
	Locus150	0.5	0.292893	0.707107	2	2	1.70711	0.604722	0.414214	0.552285
	Locus151	0	0	1	2	0	1	0	0	0
	Locus152	1	1	0	2	1	1	0	0	0
	Locus153	0.5	0.292893	0.707107	2	2	1.70711	0.604722	0.414214	0.552285
	Locus154	0.5	0.292893	0.707107	2	2	1.70711	0.604722	0.414214	0.552285
	Locus155	0	0	1	2	0	1	0	0	0
	Locus156	0.5	0.292893	0.707107	2	2	1.70711	0.604722	0.414214	0.552285
	Locus157	0	0	1	2	0	1	0	0	0
	Locus158	0.5	0.292893	0.707107	2	2	1.70711	0.604722	0.414214	0.552285
	Locus159	0	0	1	2	0	1	0	0	0
	Locus160	0	0	1	2	0	1	0	0	0
	Locus161	0	0	1	2	0	1	0	0	0
	Locus162	0	0	1	2	0	1	0	0	0
	Locus163	0	0	1	2	0	1	0	0	0
	Locus164	1	1	0	2	1	1	0	0	0
	Locus165	0	0	1	2	0	1	0	0	0
Mean and SE over Loci for each Pop
Pop					N	Na	Ne	I	He	uHe
South Altay	Mean				3	0.921212	1.23897	0.203902	0.137976	0.165571
	SE				0	0.0693054	0.0278383	0.0218652	0.0150916	0.0181099
Leninogorsk	Mean				2	0.569697	1.09	0.0769646	0.0527181	0.0702908
	SE				0	0.0551985	0.0184022	0.0157377	0.0107798	0.014373
Kalbinskii Altay	Mean				5	1.50909	1.37815	0.34598	0.226949	0.252165
	SE				0	0.0611652	0.0279806	0.0204914	0.0145009	0.0161121
West Altay	Mean				2	0.654545	1.11571	0.0989545	0.0677804	0.0903739
	SE				0	0.0580889	0.0204268	0.0174691	0.0119657	0.0159543
Grand Mean and SE over Loci and Pops
					N	Na	Ne	I	He	uHe
Total	Mean				3	0.913636	1.20571	0.18145	0.121356	0.1446
	SE				0.0477093	0.0337041	0.0127987	0.0103657	0.00711342	0.00854468
Percentage of Polymorphic Loci
Population	%P
South Altay	0.357576
Leninogorsk	0.127273
Kalbinskii Altay	0.690909
West Altay	0.163636
Mean	0.334848
SE	0.129002
Na = No. of Different Alleles
Ne = No. of Effective Alleles = 1 / (p^2 + q^2)
I = Shannon's Information Index = -1* (p * Ln (p) + q * Ln(q))
He = Expected Heterozygosity = 2 * p * q
uHe = Unbiased Expected Heterozygosity = (2N / (2N-1)) * He
Where for Diploid Binary data and assuming Hardy-Weinberg Equilibrium, q = (1 - Band Freq.)^0.5 and p = 1 - q.
Warning! Results should be treated with caution given the following:
The sample size in the population South Altay is less than 5!
The sample size in the population Leninogorsk is less than 5!
The sample size in the population West Altay is less than 5!

## Sheet: BAFL
Band Frequencies, Estimated Allele Frequencies and Estimated Heterozygosity by Pop for Binary (Diploid) Data
Data Sheet	D (2)
Data Title	Random binary data with XY coords
No. Loci	165
No. Samples	12
No. Pops.	4
Band Frequency, Estimated Allele Frequency (p & q), Samples Size, No. Alleles, No. Effective Alleles, Information Index, Expected and Unbiased Expected Heterozygosity
Pop		Locus1	Locus2	Locus3	Locus4	Locus5	Locus6	Locus7	Locus8	Locus9	Locus10	Locus11	Locus12	Locus13	Locus14	Locus15	Locus16	Locus17	Locus18	Locus19	Locus20	Locus21	Locus22	Locus23	Locus24	Locus25	Locus26	Locus27	Locus28	Locus29	Locus30	Locus31	Locus32	Locus33	Locus34	Locus35	Locus36	Locus37	Locus38	Locus39	Locus40	Locus41	Locus42	Locus43	Locus44	Locus45	Locus46	Locus47	Locus48
South Altay	Band Freq.	0.33333	0.33333	0.66667	0.66667	1	1	0	0.66667	0	0.33333	0	0.33333	0.66667	0.66667	0.66667	0.66667	0	0.33333	1	0	0	0	0	0	0	0	0	0.33333	0.33333	0.33333	0.66667	1	0.66667	0.33333	0	0.66667	0.33333	0.33333	1	0.33333	0	1	0.33333	1	0.33333	0.66667	0	1
	p	0.183503	0.183503	0.42265	0.42265	1	1	0	0.42265	0	0.183503	0	0.183503	0.42265	0.42265	0.42265	0.42265	0	0.183503	1	0	0	0	0	0	0	0	0	0.183503	0.183503	0.183503	0.42265	1	0.42265	0.183503	0	0.42265	0.183503	0.183503	1	0.183503	0	1	0.183503	1	0.183503	0.42265	0	1
	q	0.816497	0.816497	0.57735	0.57735	0	0	1	0.57735	1	0.816497	1	0.816497	0.57735	0.57735	0.57735	0.57735	1	0.816497	0	1	1	1	1	1	1	1	1	0.816497	0.816497	0.816497	0.57735	0	0.57735	0.816497	1	0.57735	0.816497	0.816497	0	0.816497	1	0	0.816497	0	0.816497	0.57735	1	0
	N	3	3	3	3	3	3	3	3	3	3	3	3	3	3	3	3	3	3	3	3	3	3	3	3	3	3	3	3	3	3	3	3	3	3	3	3	3	3	3	3	3	3	3	3	3	3	3	3
	Na	2	2	2	2	1	1	0	2	0	2	0	2	2	2	2	2	0	2	1	0	0	0	0	0	0	0	0	2	2	2	2	1	2	2	0	2	2	2	1	2	0	1	2	1	2	2	0	1
	Ne	1.42788	1.42788	1.95325	1.95325	1	1	1	1.95325	1	1.42788	1	1.42788	1.95325	1.95325	1.95325	1.95325	1	1.42788	1	1	1	1	1	1	1	1	1	1.42788	1.42788	1.42788	1.95325	1	1.95325	1.42788	1	1.95325	1.42788	1.42788	1	1.42788	1	1	1.42788	1	1.42788	1.95325	1	1
	I	0.476665	0.476665	0.681133	0.681133	0	0	0	0.681133	0	0.476665	0	0.476665	0.681133	0.681133	0.681133	0.681133	0	0.476665	0	0	0	0	0	0	0	0	0	0.476665	0.476665	0.476665	0.681133	0	0.681133	0.476665	0	0.681133	0.476665	0.476665	0	0.476665	0	0	0.476665	0	0.476665	0.681133	0	0
	He	0.29966	0.29966	0.488034	0.488034	0	0	0	0.488034	0	0.29966	0	0.29966	0.488034	0.488034	0.488034	0.488034	0	0.29966	0	0	0	0	0	0	0	0	0	0.29966	0.29966	0.29966	0.488034	0	0.488034	0.29966	0	0.488034	0.29966	0.29966	0	0.29966	0	0	0.29966	0	0.29966	0.488034	0	0
	uHe	0.359592	0.359592	0.585641	0.585641	0	0	0	0.585641	0	0.359592	0	0.359592	0.585641	0.585641	0.585641	0.585641	0	0.359592	0	0	0	0	0	0	0	0	0	0.359592	0.359592	0.359592	0.585641	0	0.585641	0.359592	0	0.585641	0.359592	0.359592	0	0.359592	0	0	0.359592	0	0.359592	0.585641	0	0
Leninogorsk	Band Freq.	0.5	0.5	0	0.5	1	1	0	1	0	0	0	0	0.5	1	1	1	0.5	1	1	0	0	0	0	0	1	0	0	0	1	0	0	1	0	0.5	0	0.5	0.5	0	1	0.5	0	1	0.5	1	0.5	0.5	0	1
	p	0.292893	0.292893	0	0.292893	1	1	0	1	0	0	0	0	0.292893	1	1	1	0.292893	1	1	0	0	0	0	0	1	0	0	0	1	0	0	1	0	0.292893	0	0.292893	0.292893	0	1	0.292893	0	1	0.292893	1	0.292893	0.292893	0	1
	q	0.707107	0.707107	1	0.707107	0	0	1	0	1	1	1	1	0.707107	0	0	0	0.707107	0	0	1	1	1	1	1	0	1	1	1	0	1	1	0	1	0.707107	1	0.707107	0.707107	1	0	0.707107	1	0	0.707107	0	0.707107	0.707107	1	0
	N	2	2	2	2	2	2	2	2	2	2	2	2	2	2	2	2	2	2	2	2	2	2	2	2	2	2	2	2	2	2	2	2	2	2	2	2	2	2	2	2	2	2	2	2	2	2	2	2
	Na	2	2	0	2	1	1	0	1	0	0	0	0	2	1	1	1	2	1	1	0	0	0	0	0	1	0	0	0	1	0	0	1	0	2	0	2	2	0	1	2	0	1	2	1	2	2	0	1
	Ne	1.70711	1.70711	1	1.70711	1	1	1	1	1	1	1	1	1.70711	1	1	1	1.70711	1	1	1	1	1	1	1	1	1	1	1	1	1	1	1	1	1.70711	1	1.70711	1.70711	1	1	1.70711	1	1	1.70711	1	1.70711	1.70711	1	1
	I	0.604722	0.604722	0	0.604722	0	0	0	0	0	0	0	0	0.604722	0	0	0	0.604722	0	0	0	0	0	0	0	0	0	0	0	0	0	0	0	0	0.604722	0	0.604722	0.604722	0	0	0.604722	0	0	0.604722	0	0.604722	0.604722	0	0
	He	0.414214	0.414214	0	0.414214	0	0	0	0	0	0	0	0	0.414214	0	0	0	0.414214	0	0	0	0	0	0	0	0	0	0	0	0	0	0	0	0	0.414214	0	0.414214	0.414214	0	0	0.414214	0	0	0.414214	0	0.414214	0.414214	0	0
	uHe	0.552285	0.552285	0	0.552285	0	0	0	0	0	0	0	0	0.552285	0	0	0	0.552285	0	0	0	0	0	0	0	0	0	0	0	0	0	0	0	0	0.552285	0	0.552285	0.552285	0	0	0.552285	0	0	0.552285	0	0.552285	0.552285	0	0
Kalbinskii Altay	Band Freq.	0.6	0.4	0.6	0.6	1	1	0.4	1	0	0.2	0.2	0	1	0.8	0.8	0.2	0.6	0.6	1	0.6	0	0.8	0.4	0.2	0.4	0.4	0	0	0.6	0.2	0.4	1	0.4	0.4	0.6	0.2	0.2	0.6	1	0.6	0	1	0.8	0.6	0.6	0.4	0.2	1
	p	0.367544	0.225403	0.367544	0.367544	1	1	0.225403	1	0	0.105573	0.105573	0	1	0.552786	0.552786	0.105573	0.367544	0.367544	1	0.367544	0	0.552786	0.225403	0.105573	0.225403	0.225403	0	0	0.367544	0.105573	0.225403	1	0.225403	0.225403	0.367544	0.105573	0.105573	0.367544	1	0.367544	0	1	0.552786	0.367544	0.367544	0.225403	0.105573	1
	q	0.632456	0.774597	0.632456	0.632456	0	0	0.774597	0	1	0.894427	0.894427	1	0	0.447214	0.447214	0.894427	0.632456	0.632456	0	0.632456	1	0.447214	0.774597	0.894427	0.774597	0.774597	1	1	0.632456	0.894427	0.774597	0	0.774597	0.774597	0.632456	0.894427	0.894427	0.632456	0	0.632456	1	0	0.447214	0.632456	0.632456	0.774597	0.894427	0
	N	5	5	5	5	5	5	5	5	5	5	5	5	5	5	5	5	5	5	5	5	5	5	5	5	5	5	5	5	5	5	5	5	5	5	5	5	5	5	5	5	5	5	5	5	5	5	5	5
	Na	2	2	2	2	1	1	2	1	0	2	2	0	1	2	2	2	2	2	1	2	0	2	2	2	2	2	0	0	2	2	2	1	2	2	2	2	2	2	1	2	0	1	2	2	2	2	2	1
	Ne	1.86885	1.53655	1.86885	1.86885	1	1	1.53655	1	1	1.23282	1.23282	1	1	1.97795	1.97795	1.23282	1.86885	1.86885	1	1.86885	1	1.97795	1.53655	1.23282	1.53655	1.53655	1	1	1.86885	1.23282	1.53655	1	1.53655	1.53655	1.86885	1.23282	1.23282	1.86885	1	1.86885	1	1	1.97795	1.86885	1.86885	1.53655	1.23282	1
	I	0.657636	0.533662	0.657636	0.657636	0	0	0.533662	0	0	0.337158	0.337158	0	0	0.687564	0.687564	0.337158	0.657636	0.657636	0	0.657636	0	0.687564	0.533662	0.337158	0.533662	0.533662	0	0	0.657636	0.337158	0.533662	0	0.533662	0.533662	0.657636	0.337158	0.337158	0.657636	0	0.657636	0	0	0.687564	0.657636	0.657636	0.533662	0.337158	0
	He	0.464911	0.349193	0.464911	0.464911	0	0	0.349193	0	0	0.188854	0.188854	0	0	0.494427	0.494427	0.188854	0.464911	0.464911	0	0.464911	0	0.494427	0.349193	0.188854	0.349193	0.349193	0	0	0.464911	0.188854	0.349193	0	0.349193	0.349193	0.464911	0.188854	0.188854	0.464911	0	0.464911	0	0	0.494427	0.464911	0.464911	0.349193	0.188854	0
	uHe	0.516568	0.387993	0.516568	0.516568	0	0	0.387993	0	0	0.209838	0.209838	0	0	0.549364	0.549364	0.209838	0.516568	0.516568	0	0.516568	0	0.549364	0.387993	0.209838	0.387993	0.387993	0	0	0.516568	0.209838	0.387993	0	0.387993	0.387993	0.516568	0.209838	0.209838	0.516568	0	0.516568	0	0	0.549364	0.516568	0.516568	0.387993	0.209838	0
West Altay	Band Freq.	1	0	0.5	0.5	1	1	0	1	0	0	0.5	0	1	0	0.5	0	1	0	1	0	0	1	0	0	0.5	0.5	0	0	1	0	1	1	1	0.5	0	1	0	0	1	0.5	0	1	0.5	1	0.5	1	0	1
	p	1	0	0.292893	0.292893	1	1	0	1	0	0	0.292893	0	1	0	0.292893	0	1	0	1	0	0	1	0	0	0.292893	0.292893	0	0	1	0	1	1	1	0.292893	0	1	0	0	1	0.292893	0	1	0.292893	1	0.292893	1	0	1
	q	0	1	0.707107	0.707107	0	0	1	0	1	1	0.707107	1	0	1	0.707107	1	0	1	0	1	1	0	1	1	0.707107	0.707107	1	1	0	1	0	0	0	0.707107	1	0	1	1	0	0.707107	1	0	0.707107	0	0.707107	0	1	0
	N	2	2	2	2	2	2	2	2	2	2	2	2	2	2	2	2	2	2	2	2	2	2	2	2	2	2	2	2	2	2	2	2	2	2	2	2	2	2	2	2	2	2	2	2	2	2	2	2
	Na	1	0	2	2	1	1	0	1	0	0	2	0	1	0	2	0	1	0	1	0	0	1	0	0	2	2	0	0	1	0	1	1	1	2	0	1	0	0	1	2	0	1	2	1	2	1	0	1
	Ne	1	1	1.70711	1.70711	1	1	1	1	1	1	1.70711	1	1	1	1.70711	1	1	1	1	1	1	1	1	1	1.70711	1.70711	1	1	1	1	1	1	1	1.70711	1	1	1	1	1	1.70711	1	1	1.70711	1	1.70711	1	1	1
	I	0	0	0.604722	0.604722	0	0	0	0	0	0	0.604722	0	0	0	0.604722	0	0	0	0	0	0	0	0	0	0.604722	0.604722	0	0	0	0	0	0	0	0.604722	0	0	0	0	0	0.604722	0	0	0.604722	0	0.604722	0	0	0
	He	0	0	0.414214	0.414214	0	0	0	0	0	0	0.414214	0	0	0	0.414214	0	0	0	0	0	0	0	0	0	0.414214	0.414214	0	0	0	0	0	0	0	0.414214	0	0	0	0	0	0.414214	0	0	0.414214	0	0.414214	0	0	0
	uHe	0	0	0.552285	0.552285	0	0	0	0	0	0	0.552285	0	0	0	0.552285	0	0	0	0	0	0	0	0	0	0.552285	0.552285	0	0	0	0	0	0	0	0.552285	0	0	0	0	0	0.552285	0	0	0.552285	0	0.552285	0	0	0
Mean and SE over Pops for each Locus
		Locus1	Locus2	Locus3	Locus4	Locus5	Locus6	Locus7	Locus8	Locus9	Locus10	Locus11	Locus12	Locus13	Locus14	Locus15	Locus16	Locus17	Locus18	Locus19	Locus20	Locus21	Locus22	Locus23	Locus24	Locus25	Locus26	Locus27	Locus28	Locus29	Locus30	Locus31	Locus32	Locus33	Locus34	Locus35	Locus36	Locus37	Locus38	Locus39	Locus40	Locus41	Locus42	Locus43	Locus44	Locus45	Locus46	Locus47	Locus48
N	Mean	3	3	3	3	3	3	3	3	3	3	3	3	3	3	3	3	3	3	3	3	3	3	3	3	3	3	3	3	3	3	3	3	3	3	3	3	3	3	3	3	3	3	3	3	3	3	3	3
	SE	0.110096	0.110096	0.110096	0.110096	0.110096	0.110096	0.110096	0.110096	0.110096	0.110096	0.110096	0.110096	0.110096	0.110096	0.110096	0.110096	0.110096	0.110096	0.110096	0.110096	0.110096	0.110096	0.110096	0.110096	0.110096	0.110096	0.110096	0.110096	0.110096	0.110096	0.110096	0.110096	0.110096	0.110096	0.110096	0.110096	0.110096	0.110096	0.110096	0.110096	0.110096	0.110096	0.110096	0.110096	0.110096	0.110096	0.110096	0.110096
Na	Mean	1.75	1.5	1.5	2	1	1	0.5	1.25	0	1	1	0.5	1.5	1.25	1.75	1.25	1.25	1.25	1	0.5	0	0.75	0.5	0.5	1.25	1	0	0.5	1.5	1	1.25	1	1.25	2	0.5	1.75	1.5	1	1	2	0	1	2	1.25	2	1.75	0.5	1
	SE	0.0389249	0.0778499	0.0778499	0	0	0	0.0778499	0.0389249	0	0.0898933	0.0898933	0.0778499	0.0449467	0.0745356	0.0389249	0.0745356	0.0745356	0.0745356	0	0.0778499	0	0.0745356	0.0778499	0.0778499	0.0745356	0.0898933	0	0.0778499	0.0449467	0.0898933	0.0745356	0	0.0745356	0	0.0778499	0.0389249	0.0778499	0.0898933	0	0	0	0	0	0.0389249	0	0.0389249	0.0778499	0
Ne	Mean	1.50096	1.41788	1.6323	1.80908	1	1	1.13414	1.23831	1	1.16518	1.23498	1.10697	1.41509	1.4828	1.65958	1.29652	1.39399	1.32418	1	1.21721	1	1.24449	1.13414	1.05821	1.31092	1.31092	1	1.10697	1.32418	1.16518	1.37245	1	1.37245	1.59466	1.21721	1.4733	1.34195	1.32418	1	1.67773	1	1	1.70501	1.21721	1.67773	1.54923	1.05821	1
	SE	0.029615	0.0234611	0.0337659	0.00955109	0	0	0.0208854	0.0371054	0	0.0160903	0.0259502	0.0166551	0.0381251	0.0434078	0.0355309	0.0351391	0.0357881	0.0323367	0	0.0338199	0	0.0380668	0.0208854	0.00906267	0.02847	0.02847	0	0.0166551	0.0323367	0.0160903	0.0360051	0	0.0360051	0.0106819	0.0338199	0.0338405	0.023336	0.0323367	0	0.0142615	0	0	0.0174836	0.0338199	0.0142615	0.0314619	0.00906267	0
I	Mean	0.434756	0.403762	0.485873	0.637053	0	0	0.133416	0.170283	0	0.203456	0.23547	0.119166	0.321464	0.342174	0.493355	0.254573	0.315589	0.283575	0	0.164409	0	0.171891	0.133416	0.0842895	0.284596	0.284596	0	0.119166	0.283575	0.203456	0.303699	0	0.303699	0.554943	0.164409	0.405753	0.354636	0.283575	0	0.585936	0	0	0.593418	0.164409	0.585936	0.454879	0.0842895	0
	SE	0.0233261	0.0213484	0.0253392	0.00300077	0	0	0.0207728	0.0265131	0	0.0188191	0.0228115	0.0185541	0.0289993	0.0307599	0.0257721	0.0253616	0.0284192	0.0261323	0	0.0255984	0	0.0267634	0.0207728	0.0131239	0.0256828	0.0256828	0	0.0185541	0.0261323	0.0188191	0.0276999	0	0.0276999	0.00482759	0.0255984	0.023985	0.0202762	0.0261323	0	0.00599443	0	0	0.00677941	0.0255984	0.00599443	0.0240692	0.0131239	0
He	Mean	0.294696	0.265767	0.34179	0.445343	0	0	0.0872983	0.122008	0	0.122129	0.150767	0.074915	0.225562	0.245615	0.349169	0.169222	0.219781	0.191143	0	0.116228	0	0.123607	0.0872983	0.0472136	0.190852	0.190852	0	0.074915	0.191143	0.122129	0.209307	0	0.209307	0.36932	0.116228	0.272775	0.225682	0.191143	0	0.39825	0	0	0.405629	0.116228	0.39825	0.31286	0.0472136	0
	SE	0.0162137	0.0142685	0.0179005	0.00289322	0	0	0.0135923	0.0189967	0	0.0115295	0.0153291	0.0116642	0.0204118	0.0220801	0.018342	0.0179392	0.0198225	0.0179672	0	0.0180966	0	0.0192456	0.0135923	0.00735115	0.0172803	0.0172803	0	0.0116642	0.0179672	0.0115295	0.0193258	0	0.0193258	0.00433181	0.0180966	0.0172791	0.0137294	0.0179672	0	0.00544456	0	0	0.00623803	0.0180966	0.00544456	0.0168271	0.00735115	0
uHe	Mean	0.357111	0.324967	0.413623	0.551694	0	0	0.0969981	0.14641	0	0.142357	0.190531	0.0898979	0.284481	0.283751	0.421822	0.19887	0.267213	0.21904	0	0.129142	0	0.137341	0.0969981	0.0524596	0.235069	0.235069	0	0.0898979	0.21904	0.142357	0.243408	0	0.243408	0.463038	0.129142	0.336941	0.280429	0.21904	0	0.495182	0	0	0.503381	0.129142	0.495182	0.381479	0.0524596	0
	SE	0.019646	0.0181157	0.021579	0.00219592	0	0	0.0151026	0.022796	0	0.0136534	0.0202929	0.0139971	0.0255949	0.0255334	0.02193	0.0214998	0.0240475	0.0203124	0	0.0201074	0	0.0213839	0.0151026	0.00816794	0.0217667	0.0217667	0	0.0139971	0.0203124	0.0136534	0.0227646	0	0.0227646	0.00807326	0.0201074	0.0219231	0.0181907	0.0203124	0	0.00715817	0	0	0.00746343	0.0201074	0.00715817	0.0209099	0.00816794	0
Grand Mean and SE over Pops and Loci
		Total
N	Mean	3
	SE	0.0477093
Na	Mean	0.913636
	SE	0.0337041
Ne	Mean	1.20571
	SE	0.0127987
I	Mean	0.18145
	SE	0.0103657
He	Mean	0.121356
	SE	0.00711342
uHe	Mean	0.1446
	SE	0.00854468
Percentage of Polymorphic Loci
Population	%P
South Altay	0.357576
Leninogorsk	0.127273
Kalbinskii Altay	0.690909
West Altay	0.163636
Mean	0.334848
SE	0.129002
Na = No. of Different Alleles
Ne = No. of Effective Alleles = 1 / (p^2 + q^2)
I = Shannon's Information Index = -1* (p * Ln (p) + q * Ln(q))
He = Expected Heterozygosity = 2 * p * q
uHe = Unbiased Expected Heterozygosity = (2N / (2N-1)) * He
Where for Diploid Binary data and assuming Hardy-Weinberg Equilibrium, q = (1 - Band Freq.)^0.5 and p = 1 - q.
Warning! Results should be treated with caution given the following:
The sample size in the population South Altay is less than 5!
The sample size in the population Leninogorsk is less than 5!
The sample size in the population West Altay is less than 5!
[truncated: 117 more columns]

## Sheet: BAPT
Band Patterns for Binary (Diploid) Data
Data Sheet	D (2)
Data Title	Random binary data with XY coords
No. Loci	165
No. Samples	12
No. Pops.	4
Total Band Patterns for Binary (Diploid) Data by Populations
Population	South Altay	Leninogorsk	Kalbinskii Altay	West Altay
No. Bands	93	73	135	81
No. Bands Freq. >= 5%	93	73	135	81
No. Private Bands	6	0	38	2
No. LComm Bands (<=25%)	0	0	0	0
No. LComm Bands (<=50%)	12	1	18	9
Mean He	0.137976	0.0527181	0.226949	0.0677804
SE of Mean He	0.0150916	0.0107798	0.0145009	0.0119657
Mean uHe	0.165571	0.0702908	0.252165	0.0903739
SE of Mean uHe	0.0181099	0.014373	0.0161121	0.0159543
No. Bands = No. of Different Bands
No. Bands Freq. >= 5% = No. of Different Bands with a Frequency >= 5%
No. Private Bands = No. of Bands Unique to a Single Population
No. LComm Bands (<=25%) = No. of Locally Common Bands (Freq. >= 5%) Found in 25% or Fewer Populations
No. LComm Bands (<=50%) = No. of Locally Common Bands (Freq. >= 5%) Found in 50% or Fewer Populations
He = Expected Heterozygosity = 2 * p * q
uHe = Unbiased Expected Heterozygosity = (2N / (2N-1)) * He
Where for Diploid Binary data and assuming Hardy-Weinberg Equilibrium, q = (1 - Band Freq.)^0.5 and p = 1 - q.
Warning! Results should be treated with caution given the following:
The sample size in the population South Altay is less than 5!
The sample size in the population Leninogorsk is less than 5!
The sample size in the population West Altay is less than 5!

## Sheet: NeiP
1	4
Random binary data with XY coords	D (2)	Pairwise Population Matrix of Nei Genetic Distance
South Altay	Leninogorsk	Kalbinskii Altay	West Altay
0				South Altay
0.0848914	0			Leninogorsk
0.0729427	0.102762	0		Kalbinskii Altay
0.1069	0.106833	0.110332	0	West Altay
Random binary data with XY coords	D (2)	Pairwise Population Matrix of Nei Genetic Identity
South Altay	Leninogorsk	Kalbinskii Altay	West Altay
1				South Altay
0.918612	1			Leninogorsk
0.929654	0.902342	1		Kalbinskii Altay
0.898615	0.898676	0.895537	1	West Altay
Warning! Results should be treated with caution given the following:
The sample size in the population South Altay is less than 5!
The sample size in the population Leninogorsk is less than 5!
The sample size in the population West Altay is less than 5!

## Sheet: NeiL
Results of Pairwise Population Nei Genetic Distance Analysis
Data Sheet	D (2)
Data Title	Random binary data with XY coords
No. Loci	165
No. Samples	12
No. Pops.	4
Pairwise Population Matrix of Nei Genetic Distance
	South Altay	Leninogorsk	Kalbinskii Altay	West Altay
South Altay	0				South Altay
Leninogorsk	0.0848914	0			Leninogorsk
Kalbinskii Altay	0.0729427	0.102762	0		Kalbinskii Altay
West Altay	0.1069	0.106833	0.110332	0	West Altay
	South Altay	Leninogorsk	Kalbinskii Altay	West Altay
Pairwise Population Matrix of Nei Genetic Identity
	South Altay	Leninogorsk	Kalbinskii Altay	West Altay
South Altay	1				South Altay
Leninogorsk	0.918612	1			Leninogorsk
Kalbinskii Altay	0.929654	0.902342	1		Kalbinskii Altay
West Altay	0.898615	0.898676	0.895537	1	West Altay
	South Altay	Leninogorsk	Kalbinskii Altay	West Altay
Nei Genetic Distance = -1 * Ln(Nei Identity). Nei Unbiased Genetic Distance = -1 * Ln(Nei Unbiased Identity).
Tip: Choose the Step by Step option to show full calculation steps and additional formulas.
Warning! Results should be treated with caution given the following:
The sample size in the population South Altay is less than 5!
The sample size in the population Leninogorsk is less than 5!
The sample size in the population West Altay is less than 5!

## Sheet: NeiT
Pairwise Population Nei Genetic Distance and Nei Genetic Identity Values as Table
Data Sheet	D (2)
Data Title	Random binary data with XY coords
No. Samples	12
No. Pops	4
Pairwise Matrix as Table
Pop1	Pop2	Nei D	Nei I		#Pop1	#Pop2
South Altay	Leninogorsk	0.0848914	0.918612		3	2
South Altay	Kalbinskii Altay	0.0729427	0.929654		3	5
Leninogorsk	Kalbinskii Altay	0.102762	0.902342		2	5
South Altay	West Altay	0.1069	0.898615		3	2
Leninogorsk	West Altay	0.106833	0.898676		2	2
Kalbinskii Altay	West Altay	0.110332	0.895537		5	2

[truncated: 4 more sheets: uNeiP, uNeiL, uNeiT, BAFP]
