# Supplementary material for: DNA profiling and assessment of genetic diversity of relict species Allium altaicum Pall. on the territory of Altai
Source: PeerJ. 2021 Jan 8;9:e10674. doi: 10.7717/peerj.10674 (PMC7798630; doi:10.7717/peerj.10674)
Supplement: Supplemental Information 2 [file peerj-09-10674-s002.xlsx]

## Sheet: data
165	12	3	6	4	2	1	12	3	12
Random binary data with XY coords			1000 m	1000-2000 m	above 2000 m				Region1
Sample	Pop	Locus1	Locus2	Locus3	Locus4	Locus5	Locus6	Locus7	Locus8	Locus9	Locus10	Locus11	Locus12	Locus13	Locus14	Locus15	Locus16	Locus17	Locus18	Locus19	Locus20	Locus21	Locus22	Locus23	Locus24	Locus25	Locus26	Locus27	Locus28	Locus29	Locus30	Locus31	Locus32	Locus33	Locus34	Locus35	Locus36	Locus37	Locus38	Locus39	Locus40	Locus41	Locus42	Locus43	Locus44	Locus45	Locus46	Locus47	Locus48
Al 1	high mountain	0	0	1	1	1	1	0	0	0	1	0	0	0	0	0	0	0	0	1	0	0	0	0	0	0	0	0	0	0	0	1	1	0	0	0	1	1	0	1	0	0	1	1	1	0	1	0	1
Al 9	mid-mountain	1	0	1	0	1	1	0	1	0	0	0	0	1	1	1	1	0	1	1	0	0	0	0	0	0	0	0	0	1	1	0	1	1	1	0	1	0	1	1	1	0	1	0	1	0	0	0	1
Al 13	high mountain	0	1	0	1	1	1	0	1	0	0	0	1	1	1	1	1	0	0	1	0	0	0	0	0	0	0	0	1	0	0	1	1	1	0	0	0	0	0	1	0	0	1	0	1	1	1	0	1
Al 10	low moutain	1	1	0	1	1	1	0	1	0	0	0	0	1	1	1	1	0	1	1	0	0	0	0	0	1	0	0	0	1	0	0	1	0	1	0	1	1	0	1	0	0	1	1	1	0	0	0	1
Al 11	mid-mountain	0	0	0	0	1	1	0	1	0	0	0	0	0	1	1	1	1	1	1	0	0	0	0	0	1	0	0	0	1	0	0	1	0	0	0	0	0	0	1	1	0	1	0	1	1	1	0	1
Al 15	low moutain	1	0	1	1	1	1	0	1	0	1	1	0	1	1	1	0	1	1	1	0	0	1	0	1	1	0	0	0	1	0	0	1	1	1	0	0	0	0	1	1	0	1	1	0	1	1	0	1
Al 2	low moutain	1	1	1	1	1	1	0	1	0	0	0	0	1	1	1	1	0	1	1	1	0	1	1	0	1	0	0	0	0	0	0	1	0	0	1	1	1	1	1	1	0	1	1	1	0	0	0	1
Al 17	low moutain	0	0	0	0	1	1	1	1	0	0	0	0	1	1	1	0	1	0	1	0	0	1	0	0	0	1	0	0	1	0	1	1	0	0	1	0	0	1	1	0	0	1	1	0	0	0	1	1
Al 8	low moutain	0	1	0	0	1	1	1	1	0	0	0	0	1	0	1	0	0	0	1	1	0	1	0	0	0	0	0	0	0	0	1	1	0	1	1	0	0	1	1	1	0	1	1	1	1	0	0	1
Al 12	low moutain	1	0	1	1	1	1	0	1	0	0	0	0	1	1	0	0	1	1	1	1	0	0	1	0	0	1	0	0	1	1	0	1	1	0	0	0	0	0	1	0	0	1	0	1	1	1	0	1
Al 14	mid-mountain	1	0	1	0	1	1	0	1	0	0	1	0	1	0	1	0	1	0	1	0	0	1	0	0	0	0	0	0	1	0	1	1	1	0	0	1	0	0	1	1	0	1	0	1	0	1	0	1
Al 16	mid-mountain	1	0	0	1	1	1	0	1	0	0	0	0	1	0	0	0	1	0	1	0	0	1	0	0	1	1	0	0	1	0	1	1	1	1	0	1	0	0	1	0	0	1	1	1	1	1	0	1
[truncated: 117 more columns]

## Sheet: GD
1	12	3	6	4	2	1	12
Random binary data with XY coords	Лист1	Binary Distance	1000 m	1000-2000 m	above 2000 m
Al 1	Al 9	Al 13	Al 10	Al 11	Al 15	Al 2	Al 17	Al 8	Al 12	Al 14	Al 16
0	50	33	39	36	49	55	62	46	47	41	40	Al 1
50	0	35	29	28	35	51	66	36	41	33	36	Al 9
33	35	0	28	19	34	54	61	35	36	28	31	Al 13
39	29	28	0	21	26	46	61	37	34	32	27	Al 10
36	28	19	21	0	23	51	62	36	29	27	26	Al 11
49	35	34	26	23	0	52	69	41	32	28	21	Al 15
55	51	54	46	51	52	0	73	45	52	54	51	Al 2
62	66	61	61	62	69	73	0	60	73	61	68	Al 17
46	36	35	37	36	41	45	60	0	51	37	38	Al 8
47	41	36	34	29	32	52	73	51	0	38	27	Al 12
41	33	28	32	27	28	54	61	37	38	0	27	Al 14
40	36	31	27	26	21	51	68	38	27	27	0	Al 16

## Sheet: PCoA
Principal Coordinates Analysis (PCoA)		3	6	4	2
PCoA via Distance matrix with data standardization			1000 m	1000-2000 m	above 2000 m
Data Sheet	GD
Data Title	Random binary data with XY coords
No. Samples	12	No. Pops.	3
Percentage of variation explained by the first 3 axes
Axis	1	2	3
%	39.5057	18.9411	11.8932
Cum %	39.5057	58.4468	70.34
Eigen Values by Axis and Sample Eigen Vectors
Axis No.	1	2	3	4	5	6	7	8	9	10	11
EigenValue	430.256	206.288	129.529	116.797	62.2708	43.0704	39.5638	31.7777	16.8816	9.16699	3.49835
Al 1	0.167497	-1.94019	8.55419	-3.47922	-0.35268	-0.164296	1.65376	-1.45758	0.911809	0.194064	0.344196
Al 9	-3.58839	0.0335768	-5.01465	-1.68479	-4.57304	1.9627	1.76931	-1.83122	0.578119	-0.676808	0.131955
Al 13	-3.30038	-3.44681	1.5845	-2.85757	-1.0954	0.539997	-2.27592	2.90762	-0.862944	-1.65928	0.209
Al 10	-3.80029	-0.646146	-0.681573	-0.132945	-2.24917	-4.21568	0.727757	-0.212407	-2.37953	0.764465	0.200543
Al 11	-4.68671	-2.69104	-0.0459623	-0.55822	-1.79884	-1.08216	-0.985038	1.38702	1.74508	0.977012	-1.2173
Al 15	-5.79708	-1.11136	-2.64519	2.6312	2.52963	-2.52955	0.708528	0.741985	2.04464	-0.46595	0.810594
Al 2	0.991264	12.2985	1.25323	0.443762	-0.0102266	-0.0880317	0.76254	1.38707	-0.0374987	-0.317812	-0.266483
Al 17	16.0836	-3.84114	-1.55499	2.21235	0.0118002	-0.330765	-0.260395	-0.0289012	-0.0544566	-0.0933272	-0.107467
Al 8	-0.293758	2.10618	-3.21157	-6.31579	2.46834	0.302498	-2.96048	-1.26633	0.0150917	0.937162	0.283884
Al 12	-5.7487	0.00103894	2.14909	6.19754	-1.03913	2.49804	-2.4548	-0.5988	-0.407683	0.905131	0.41882
Al 14	-3.3618	-3.1052	-1.47452	-0.966831	2.7886	2.64638	3.32724	2.03279	-1.05368	0.886906	-0.0822426
Al 16	-5.68728	-1.28942	0.37211	1.45278	3.22354	-0.325141	-0.0796989	-2.70311	-0.895691	-1.25225	-0.891269

## Sheet: PhiPT
Results of Analysis of Molecular Variance
Input as Binary Distance Matrix for Calculation of PhiPT
Data Sheet	Лист1
Data Title	Random binary data with XY coords
No. Samples	12
No. Pops	3
No. Regions	1
No. Permutations	999	No. PW Pop Permutations	999
N0	3.66667
SSTOT	229.167
Pop	1000 m	1000-2000 m	above 2000 m
n	6	4	2
SSWP	80.8333	88.5	13.5
Summary AMOVA Table
Source	df	SS	MS	Est. Var.	%
Among Pops	2	46.3333	23.1667	0.777778	0.0368745
Within Pops	9	182.833	20.3148	20.3148	0.963126
Total	11	229.167		21.0926	1
Stat	Value	P(rand >= data)
PhiPT	0.0368745	0.192
PhiPT max	0.752812
Phi'PT	0.0489823
Probability, P(rand >= data), for PhiPT is based on standard permutation across the full data set.
PhiPT = AP / (WP + AP) = AP / TOT
Key: AP = Est. Var. Among Pops, WP = Est. Var. Within Pops

## Sheet: BAFP
Band Frequencies, Estimated Allele Frequencies and Estimated Heterozygosity by Pop for Binary (Diploid) Data
Data Sheet	Лист1
Data Title	Random binary data with XY coords
No. Loci	165
No. Samples	12
No. Pops.	3
Band Frequency, Estimated Allele Frequency (p & q), Samples Size, No. Alleles, No. Effective Alleles, Information Index, Expected and Unbiased Expected Heterozygosity
Pop	Locus	Band Freq.	p	q	N	Na	Ne	I	He	uHe
1000 m	Locus1	0.5	0.292893	0.707107	6	2	1.70711	0.604722	0.414214	0.451869
	Locus2	0.33333	0.183503	0.816497	6	2	1.42788	0.476665	0.29966	0.326902
	Locus3	0.5	0.292893	0.707107	6	2	1.70711	0.604722	0.414214	0.451869
	Locus4	0.66667	0.42265	0.57735	6	2	1.95325	0.681133	0.488034	0.532401
	Locus5	1	1	0	6	1	1	0	0	0
	Locus6	1	1	0	6	1	1	0	0	0
	Locus7	0	0	1	6	0	1	0	0	0
	Locus8	0.83333	0.591752	0.408248	6	2	1.93485	0.676215	0.483163	0.527087
	Locus9	0	0	1	6	0	1	0	0	0
	Locus10	0.33333	0.183503	0.816497	6	2	1.42788	0.476665	0.29966	0.326902
	Locus11	0.16667	0.0871291	0.912871	6	2	1.18917	0.295845	0.159075	0.173537
	Locus12	0.16667	0.0871291	0.912871	6	2	1.18917	0.295845	0.159075	0.173537
	Locus13	0.66667	0.42265	0.57735	6	2	1.95325	0.681133	0.488034	0.532401
	Locus14	0.83333	0.591752	0.408248	6	2	1.93485	0.676215	0.483163	0.527087
	Locus15	0.83333	0.591752	0.408248	6	2	1.93485	0.676215	0.483163	0.527087
	Locus16	0.66667	0.42265	0.57735	6	2	1.95325	0.681133	0.488034	0.532401
	Locus17	0.33333	0.183503	0.816497	6	2	1.42788	0.476665	0.29966	0.326902
	Locus18	0.66667	0.42265	0.57735	6	2	1.95325	0.681133	0.488034	0.532401
	Locus19	1	1	0	6	1	1	0	0	0
	Locus20	0	0	1	6	0	1	0	0	0
	Locus21	0	0	1	6	0	1	0	0	0
	Locus22	0.16667	0.0871291	0.912871	6	2	1.18917	0.295845	0.159075	0.173537
	Locus23	0	0	1	6	0	1	0	0	0
	Locus24	0.16667	0.0871291	0.912871	6	2	1.18917	0.295845	0.159075	0.173537
	Locus25	0.5	0.292893	0.707107	6	2	1.70711	0.604722	0.414214	0.451869
	Locus26	0	0	1	6	0	1	0	0	0
	Locus27	0	0	1	6	0	1	0	0	0
	Locus28	0.16667	0.0871291	0.912871	6	2	1.18917	0.295845	0.159075	0.173537
	Locus29	0.66667	0.42265	0.57735	6	2	1.95325	0.681133	0.488034	0.532401
	Locus30	0.16667	0.0871291	0.912871	6	2	1.18917	0.295845	0.159075	0.173537
	Locus31	0.33333	0.183503	0.816497	6	2	1.42788	0.476665	0.29966	0.326902
	Locus32	1	1	0	6	1	1	0	0	0
	Locus33	0.5	0.292893	0.707107	6	2	1.70711	0.604722	0.414214	0.451869
	Locus34	0.5	0.292893	0.707107	6	2	1.70711	0.604722	0.414214	0.451869
	Locus35	0	0	1	6	0	1	0	0	0
	Locus36	0.5	0.292893	0.707107	6	2	1.70711	0.604722	0.414214	0.451869
	Locus37	0.33333	0.183503	0.816497	6	2	1.42788	0.476665	0.29966	0.326902
	Locus38	0.16667	0.0871291	0.912871	6	2	1.18917	0.295845	0.159075	0.173537
	Locus39	1	1	0	6	1	1	0	0	0
	Locus40	0.5	0.292893	0.707107	6	2	1.70711	0.604722	0.414214	0.451869
	Locus41	0	0	1	6	0	1	0	0	0
	Locus42	1	1	0	6	1	1	0	0	0
	Locus43	0.5	0.292893	0.707107	6	2	1.70711	0.604722	0.414214	0.451869
	Locus44	0.83333	0.591752	0.408248	6	2	1.93485	0.676215	0.483163	0.527087
	Locus45	0.5	0.292893	0.707107	6	2	1.70711	0.604722	0.414214	0.451869
	Locus46	0.66667	0.42265	0.57735	6	2	1.95325	0.681133	0.488034	0.532401
	Locus47	0	0	1	6	0	1	0	0	0
	Locus48	1	1	0	6	1	1	0	0	0
	Locus49	0	0	1	6	0	1	0	0	0
	Locus50	0.83333	0.591752	0.408248	6	2	1.93485	0.676215	0.483163	0.527087
	Locus51	0.16667	0.0871291	0.912871	6	2	1.18917	0.295845	0.159075	0.173537
	Locus52	0	0	1	6	0	1	0	0	0
	Locus53	0.16667	0.0871291	0.912871	6	2	1.18917	0.295845	0.159075	0.173537
	Locus54	0	0	1	6	0	1	0	0	0
	Locus55	1	1	0	6	1	1	0	0	0
	Locus56	1	1	0	6	1	1	0	0	0
	Locus57	0.83333	0.591752	0.408248	6	2	1.93485	0.676215	0.483163	0.527087
	Locus58	1	1	0	6	1	1	0	0	0
	Locus59	0.83333	0.591752	0.408248	6	2	1.93485	0.676215	0.483163	0.527087
	Locus60	0.33333	0.183503	0.816497	6	2	1.42788	0.476665	0.29966	0.326902
	Locus61	0	0	1	6	0	1	0	0	0
	Locus62	1	1	0	6	1	1	0	0	0
	Locus63	0	0	1	6	0	1	0	0	0
	Locus64	0	0	1	6	0	1	0	0	0
	Locus65	0	0	1	6	0	1	0	0	0
	Locus66	1	1	0	6	1	1	0	0	0
	Locus67	0	0	1	6	0	1	0	0	0
	Locus68	0.83333	0.591752	0.408248	6	2	1.93485	0.676215	0.483163	0.527087
	Locus69	0	0	1	6	0	1	0	0	0
	Locus70	1	1	0	6	1	1	0	0	0
	Locus71	0	0	1	6	0	1	0	0	0
	Locus72	1	1	0	6	1	1	0	0	0
	Locus73	1	1	0	6	1	1	0	0	0
	Locus74	0	0	1	6	0	1	0	0	0
	Locus75	0	0	1	6	0	1	0	0	0
	Locus76	0	0	1	6	0	1	0	0	0
	Locus77	0	0	1	6	0	1	0	0	0
	Locus78	0	0	1	6	0	1	0	0	0
	Locus79	1	1	0	6	1	1	0	0	0
	Locus80	0	0	1	6	0	1	0	0	0
	Locus81	0.66667	0.42265	0.57735	6	2	1.95325	0.681133	0.488034	0.532401
	Locus82	0.83333	0.591752	0.408248	6	2	1.93485	0.676215	0.483163	0.527087
	Locus83	0.5	0.292893	0.707107	6	2	1.70711	0.604722	0.414214	0.451869
	Locus84	0.16667	0.0871291	0.912871	6	2	1.18917	0.295845	0.159075	0.173537
	Locus85	0.33333	0.183503	0.816497	6	2	1.42788	0.476665	0.29966	0.326902
	Locus86	0	0	1	6	0	1	0	0	0
	Locus87	0.33333	0.183503	0.816497	6	2	1.42788	0.476665	0.29966	0.326902
	Locus88	0.16667	0.0871291	0.912871	6	2	1.18917	0.295845	0.159075	0.173537
	Locus89	0.83333	0.591752	0.408248	6	2	1.93485	0.676215	0.483163	0.527087
	Locus90	0	0	1	6	0	1	0	0	0
	Locus91	1	1	0	6	1	1	0	0	0
	Locus92	0.83333	0.591752	0.408248	6	2	1.93485	0.676215	0.483163	0.527087
	Locus93	0	0	1	6	0	1	0	0	0
	Locus94	0	0	1	6	0	1	0	0	0
	Locus95	0.83333	0.591752	0.408248	6	2	1.93485	0.676215	0.483163	0.527087
	Locus96	0	0	1	6	0	1	0	0	0
	Locus97	0	0	1	6	0	1	0	0	0
	Locus98	0.66667	0.42265	0.57735	6	2	1.95325	0.681133	0.488034	0.532401
	Locus99	0.16667	0.0871291	0.912871	6	2	1.18917	0.295845	0.159075	0.173537
	Locus100	0.33333	0.183503	0.816497	6	2	1.42788	0.476665	0.29966	0.326902
	Locus101	0	0	1	6	0	1	0	0	0
	Locus102	0	0	1	6	0	1	0	0	0
	Locus103	0	0	1	6	0	1	0	0	0
	Locus104	0.16667	0.0871291	0.912871	6	2	1.18917	0.295845	0.159075	0.173537
	Locus105	0	0	1	6	0	1	0	0	0
	Locus106	0	0	1	6	0	1	0	0	0
	Locus107	0	0	1	6	0	1	0	0	0
	Locus108	0	0	1	6	0	1	0	0	0
	Locus109	0.83333	0.591752	0.408248	6	2	1.93485	0.676215	0.483163	0.527087
	Locus110	0.16667	0.0871291	0.912871	6	2	1.18917	0.295845	0.159075	0.173537
	Locus111	0	0	1	6	0	1	0	0	0
	Locus112	0	0	1	6	0	1	0	0	0
	Locus113	0	0	1	6	0	1	0	0	0
	Locus114	0	0	1	6	0	1	0	0	0
	Locus115	0.16667	0.0871291	0.912871	6	2	1.18917	0.295845	0.159075	0.173537
	Locus116	1	1	0	6	1	1	0	0	0
	Locus117	0	0	1	6	0	1	0	0	0
	Locus118	0	0	1	6	0	1	0	0	0
	Locus119	0	0	1	6	0	1	0	0	0
	Locus120	0	0	1	6	0	1	0	0	0
	Locus121	0	0	1	6	0	1	0	0	0
	Locus122	1	1	0	6	1	1	0	0	0
	Locus123	0	0	1	6	0	1	0	0	0
	Locus124	0.66667	0.42265	0.57735	6	2	1.95325	0.681133	0.488034	0.532401
	Locus125	1	1	0	6	1	1	0	0	0
	Locus126	1	1	0	6	1	1	0	0	0
	Locus127	0	0	1	6	0	1	0	0	0
	Locus128	0.66667	0.42265	0.57735	6	2	1.95325	0.681133	0.488034	0.532401
	Locus129	1	1	0	6	1	1	0	0	0
	Locus130	0.5	0.292893	0.707107	6	2	1.70711	0.604722	0.414214	0.451869
	Locus131	0.83333	0.591752	0.408248	6	2	1.93485	0.676215	0.483163	0.527087
	Locus132	1	1	0	6	1	1	0	0	0
	Locus133	0.33333	0.183503	0.816497	6	2	1.42788	0.476665	0.29966	0.326902
	Locus134	0.16667	0.0871291	0.912871	6	2	1.18917	0.295845	0.159075	0.173537
	Locus135	0	0	1	6	0	1	0	0	0
	Locus136	0	0	1	6	0	1	0	0	0
	Locus137	0.66667	0.42265	0.57735	6	2	1.95325	0.681133	0.488034	0.532401
	Locus138	1	1	0	6	1	1	0	0	0
	Locus139	0.83333	0.591752	0.408248	6	2	1.93485	0.676215	0.483163	0.527087
	Locus140	0.83333	0.591752	0.408248	6	2	1.93485	0.676215	0.483163	0.527087
	Locus141	1	1	0	6	1	1	0	0	0
	Locus142	0	0	1	6	0	1	0	0	0
	Locus143	0	0	1	6	0	1	0	0	0
	Locus144	0.66667	0.42265	0.57735	6	2	1.95325	0.681133	0.488034	0.532401
	Locus145	0.33333	0.183503	0.816497	6	2	1.42788	0.476665	0.29966	0.326902
	Locus146	0	0	1	6	0	1	0	0	0
	Locus147	0.16667	0.0871291	0.912871	6	2	1.18917	0.295845	0.159075	0.173537
	Locus148	1	1	0	6	1	1	0	0	0
	Locus149	1	1	0	6	1	1	0	0	0
	Locus150	0.33333	0.183503	0.816497	6	2	1.42788	0.476665	0.29966	0.326902
	Locus151	0.16667	0.0871291	0.912871	6	2	1.18917	0.295845	0.159075	0.173537
	Locus152	1	1	0	6	1	1	0	0	0
	Locus153	0	0	1	6	0	1	0	0	0
	Locus154	0.16667	0.0871291	0.912871	6	2	1.18917	0.295845	0.159075	0.173537
	Locus155	0	0	1	6	0	1	0	0	0
	Locus156	0.16667	0.0871291	0.912871	6	2	1.18917	0.295845	0.159075	0.173537
	Locus157	0.16667	0.0871291	0.912871	6	2	1.18917	0.295845	0.159075	0.173537
	Locus158	0	0	1	6	0	1	0	0	0
	Locus159	0	0	1	6	0	1	0	0	0
	Locus160	0.5	0.292893	0.707107	6	2	1.70711	0.604722	0.414214	0.451869
	Locus161	0	0	1	6	0	1	0	0	0
	Locus162	0	0	1	6	0	1	0	0	0
	Locus163	0	0	1	6	0	1	0	0	0
	Locus164	1	1	0	6	1	1	0	0	0
	Locus165	0	0	1	6	0	1	0	0	0
1000-2000 m	Locus1	0.5	0.292893	0.707107	4	2	1.70711	0.604722	0.414214	0.473387
	Locus2	0.5	0.292893	0.707107	4	2	1.70711	0.604722	0.414214	0.473387
	Locus3	0.5	0.292893	0.707107	4	2	1.70711	0.604722	0.414214	0.473387
	Locus4	0.5	0.292893	0.707107	4	2	1.70711	0.604722	0.414214	0.473387
	Locus5	1	1	0	4	1	1	0	0	0
	Locus6	1	1	0	4	1	1	0	0	0
	Locus7	0.5	0.292893	0.707107	4	2	1.70711	0.604722	0.414214	0.473387
	Locus8	1	1	0	4	1	1	0	0	0
	Locus9	0	0	1	4	0	1	0	0	0
	Locus10	0	0	1	4	0	1	0	0	0
	Locus11	0	0	1	4	0	1	0	0	0
	Locus12	0	0	1	4	0	1	0	0	0
	Locus13	1	1	0	4	1	1	0	0	0
	Locus14	0.75	0.5	0.5	4	2	2	0.693147	0.5	0.571429
	Locus15	0.75	0.5	0.5	4	2	2	0.693147	0.5	0.571429
	Locus16	0.25	0.133975	0.866025	4	2	1.30217	0.393873	0.232051	0.265201
	Locus17	0.5	0.292893	0.707107	4	2	1.70711	0.604722	0.414214	0.473387
	Locus18	0.5	0.292893	0.707107	4	2	1.70711	0.604722	0.414214	0.473387
	Locus19	1	1	0	4	1	1	0	0	0
	Locus20	0.75	0.5	0.5	4	2	2	0.693147	0.5	0.571429
	Locus21	0	0	1	4	0	1	0	0	0
	Locus22	0.75	0.5	0.5	4	2	2	0.693147	0.5	0.571429
	Locus23	0.5	0.292893	0.707107	4	2	1.70711	0.604722	0.414214	0.473387
	Locus24	0	0	1	4	0	1	0	0	0
	Locus25	0.25	0.133975	0.866025	4	2	1.30217	0.393873	0.232051	0.265201
	Locus26	0.5	0.292893	0.707107	4	2	1.70711	0.604722	0.414214	0.473387
	Locus27	0	0	1	4	0	1	0	0	0
	Locus28	0	0	1	4	0	1	0	0	0
	Locus29	0.5	0.292893	0.707107	4	2	1.70711	0.604722	0.414214	0.473387
	Locus30	0.25	0.133975	0.866025	4	2	1.30217	0.393873	0.232051	0.265201
	Locus31	0.5	0.292893	0.707107	4	2	1.70711	0.604722	0.414214	0.473387
	Locus32	1	1	0	4	1	1	0	0	0
	Locus33	0.25	0.133975	0.866025	4	2	1.30217	0.393873	0.232051	0.265201
	Locus34	0.25	0.133975	0.866025	4	2	1.30217	0.393873	0.232051	0.265201
	Locus35	0.75	0.5	0.5	4	2	2	0.693147	0.5	0.571429
	Locus36	0.25	0.133975	0.866025	4	2	1.30217	0.393873	0.232051	0.265201
	Locus37	0.25	0.133975	0.866025	4	2	1.30217	0.393873	0.232051	0.265201
	Locus38	0.75	0.5	0.5	4	2	2	0.693147	0.5	0.571429
	Locus39	1	1	0	4	1	1	0	0	0
	Locus40	0.5	0.292893	0.707107	4	2	1.70711	0.604722	0.414214	0.473387
	Locus41	0	0	1	4	0	1	0	0	0
	Locus42	1	1	0	4	1	1	0	0	0
	Locus43	0.75	0.5	0.5	4	2	2	0.693147	0.5	0.571429
	Locus44	0.75	0.5	0.5	4	2	2	0.693147	0.5	0.571429
	Locus45	0.5	0.292893	0.707107	4	2	1.70711	0.604722	0.414214	0.473387
	Locus46	0.25	0.133975	0.866025	4	2	1.30217	0.393873	0.232051	0.265201
	Locus47	0.25	0.133975	0.866025	4	2	1.30217	0.393873	0.232051	0.265201
	Locus48	1	1	0	4	1	1	0	0	0
	Locus49	0.75	0.5	0.5	4	2	2	0.693147	0.5	0.571429
	Locus50	0.25	0.133975	0.866025	4	2	1.30217	0.393873	0.232051	0.265201
	Locus51	0	0	1	4	0	1	0	0	0
	Locus52	0	0	1	4	0	1	0	0	0
	Locus53	0	0	1	4	0	1	0	0	0
	Locus54	0.25	0.133975	0.866025	4	2	1.30217	0.393873	0.232051	0.265201
	Locus55	1	1	0	4	1	1	0	0	0
	Locus56	1	1	0	4	1	1	0	0	0
	Locus57	0.25	0.133975	0.866025	4	2	1.30217	0.393873	0.232051	0.265201
	Locus58	1	1	0	4	1	1	0	0	0
	Locus59	0.75	0.5	0.5	4	2	2	0.693147	0.5	0.571429
	Locus60	0.5	0.292893	0.707107	4	2	1.70711	0.604722	0.414214	0.473387
	Locus61	0	0	1	4	0	1	0	0	0
	Locus62	1	1	0	4	1	1	0	0	0
	Locus63	0.25	0.133975	0.866025	4	2	1.30217	0.393873	0.232051	0.265201
	Locus64	0	0	1	4	0	1	0	0	0
	Locus65	0.5	0.292893	0.707107	4	2	1.70711	0.604722	0.414214	0.473387
	Locus66	1	1	0	4	1	1	0	0	0
	Locus67	0.25	0.133975	0.866025	4	2	1.30217	0.393873	0.232051	0.265201
	Locus68	0.75	0.5	0.5	4	2	2	0.693147	0.5	0.571429
	Locus69	0.25	0.133975	0.866025	4	2	1.30217	0.393873	0.232051	0.265201
	Locus70	0.75	0.5	0.5	4	2	2	0.693147	0.5	0.571429
	Locus71	0	0	1	4	0	1	0	0	0
	Locus72	0.75	0.5	0.5	4	2	2	0.693147	0.5	0.571429
	Locus73	0.75	0.5	0.5	4	2	2	0.693147	0.5	0.571429
	Locus74	0.5	0.292893	0.707107	4	2	1.70711	0.604722	0.414214	0.473387
	Locus75	0.25	0.133975	0.866025	4	2	1.30217	0.393873	0.232051	0.265201
	Locus76	0	0	1	4	0	1	0	0	0
	Locus77	0	0	1	4	0	1	0	0	0
	Locus78	0.25	0.133975	0.866025	4	2	1.30217	0.393873	0.232051	0.265201
	Locus79	0.75	0.5	0.5	4	2	2	0.693147	0.5	0.571429
	Locus80	0	0	1	4	0	1	0	0	0
	Locus81	0.75	0.5	0.5	4	2	2	0.693147	0.5	0.571429
	Locus82	0.75	0.5	0.5	4	2	2	0.693147	0.5	0.571429
	Locus83	0.5	0.292893	0.707107	4	2	1.70711	0.604722	0.414214	0.473387
	Locus84	0.5	0.292893	0.707107	4	2	1.70711	0.604722	0.414214	0.473387
	Locus85	0.25	0.133975	0.866025	4	2	1.30217	0.393873	0.232051	0.265201
	Locus86	0	0	1	4	0	1	0	0	0
	Locus87	0	0	1	4	0	1	0	0	0
	Locus88	0.25	0.133975	0.866025	4	2	1.30217	0.393873	0.232051	0.265201
	Locus89	0.75	0.5	0.5	4	2	2	0.693147	0.5	0.571429
	Locus90	0.5	0.292893	0.707107	4	2	1.70711	0.604722	0.414214	0.473387
	Locus91	1	1	0	4	1	1	0	0	0
	Locus92	0.5	0.292893	0.707107	4	2	1.70711	0.604722	0.414214	0.473387
	Locus93	0.5	0.292893	0.707107	4	2	1.70711	0.604722	0.414214	0.473387
	Locus94	0.25	0.133975	0.866025	4	2	1.30217	0.393873	0.232051	0.265201
	Locus95	0.5	0.292893	0.707107	4	2	1.70711	0.604722	0.414214	0.473387
	Locus96	0.25	0.133975	0.866025	4	2	1.30217	0.393873	0.232051	0.265201
	Locus97	0.25	0.133975	0.866025	4	2	1.30217	0.393873	0.232051	0.265201
	Locus98	0	0	1	4	0	1	0	0	0
	Locus99	0	0	1	4	0	1	0	0	0
	Locus100	0.25	0.133975	0.866025	4	2	1.30217	0.393873	0.232051	0.265201
	Locus101	0.5	0.292893	0.707107	4	2	1.70711	0.604722	0.414214	0.473387
	Locus102	0.25	0.133975	0.866025	4	2	1.30217	0.393873	0.232051	0.265201
	Locus103	0	0	1	4	0	1	0	0	0
	Locus104	0.25	0.133975	0.866025	4	2	1.30217	0.393873	0.232051	0.265201
	Locus105	0	0	1	4	0	1	0	0	0
	Locus106	0.25	0.133975	0.866025	4	2	1.30217	0.393873	0.232051	0.265201
	Locus107	0.25	0.133975	0.866025	4	2	1.30217	0.393873	0.232051	0.265201
	Locus108	0.25	0.133975	0.866025	4	2	1.30217	0.393873	0.232051	0.265201
	Locus109	0.5	0.292893	0.707107	4	2	1.70711	0.604722	0.414214	0.473387
	Locus110	0.25	0.133975	0.866025	4	2	1.30217	0.393873	0.232051	0.265201
	Locus111	0.25	0.133975	0.866025	4	2	1.30217	0.393873	0.232051	0.265201
	Locus112	0	0	1	4	0	1	0	0	0
	Locus113	0	0	1	4	0	1	0	0	0
	Locus114	0	0	1	4	0	1	0	0	0
	Locus115	0	0	1	4	0	1	0	0	0
	Locus116	0.5	0.292893	0.707107	4	2	1.70711	0.604722	0.414214	0.473387
	Locus117	0.25	0.133975	0.866025	4	2	1.30217	0.393873	0.232051	0.265201
	Locus118	0	0	1	4	0	1	0	0	0
	Locus119	0.25	0.133975	0.866025	4	2	1.30217	0.393873	0.232051	0.265201
	Locus120	0	0	1	4	0	1	0	0	0
	Locus121	0.25	0.133975	0.866025	4	2	1.30217	0.393873	0.232051	0.265201
	Locus122	0.75	0.5	0.5	4	2	2	0.693147	0.5	0.571429
	Locus123	0.5	0.292893	0.707107	4	2	1.70711	0.604722	0.414214	0.473387
	Locus124	0.75	0.5	0.5	4	2	2	0.693147	0.5	0.571429
	Locus125	1	1	0	4	1	1	0	0	0
	Locus126	0.75	0.5	0.5	4	2	2	0.693147	0.5	0.571429
	Locus127	0	0	1	4	0	1	0	0	0
	Locus128	0.25	0.133975	0.866025	4	2	1.30217	0.393873	0.232051	0.265201
	Locus129	1	1	0	4	1	1	0	0	0
	Locus130	0.25	0.133975	0.866025	4	2	1.30217	0.393873	0.232051	0.265201
	Locus131	1	1	0	4	1	1	0	0	0
	Locus132	1	1	0	4	1	1	0	0	0
	Locus133	0.25	0.133975	0.866025	4	2	1.30217	0.393873	0.232051	0.265201
	Locus134	0.25	0.133975	0.866025	4	2	1.30217	0.393873	0.232051	0.265201
	Locus135	0.25	0.133975	0.866025	4	2	1.30217	0.393873	0.232051	0.265201
	Locus136	0.25	0.133975	0.866025	4	2	1.30217	0.393873	0.232051	0.265201
	Locus137	0	0	1	4	0	1	0	0	0
	Locus138	0.75	0.5	0.5	4	2	2	0.693147	0.5	0.571429
	Locus139	0.5	0.292893	0.707107	4	2	1.70711	0.604722	0.414214	0.473387
	Locus140	0.75	0.5	0.5	4	2	2	0.693147	0.5	0.571429
	Locus141	0.5	0.292893	0.707107	4	2	1.70711	0.604722	0.414214	0.473387
	Locus142	0.25	0.133975	0.866025	4	2	1.30217	0.393873	0.232051	0.265201
	Locus143	0.5	0.292893	0.707107	4	2	1.70711	0.604722	0.414214	0.473387
	Locus144	0.5	0.292893	0.707107	4	2	1.70711	0.604722	0.414214	0.473387
	Locus145	0	0	1	4	0	1	0	0	0
	Locus146	0.25	0.133975	0.866025	4	2	1.30217	0.393873	0.232051	0.265201
	Locus147	0.25	0.133975	0.866025	4	2	1.30217	0.393873	0.232051	0.265201
	Locus148	1	1	0	4	1	1	0	0	0
	Locus149	1	1	0	4	1	1	0	0	0
	Locus150	0.5	0.292893	0.707107	4	2	1.70711	0.604722	0.414214	0.473387
	Locus151	0.25	0.133975	0.866025	4	2	1.30217	0.393873	0.232051	0.265201
	Locus152	0.75	0.5	0.5	4	2	2	0.693147	0.5	0.571429
	Locus153	0.25	0.133975	0.866025	4	2	1.30217	0.393873	0.232051	0.265201
	Locus154	0.25	0.133975	0.866025	4	2	1.30217	0.393873	0.232051	0.265201
	Locus155	0.25	0.133975	0.866025	4	2	1.30217	0.393873	0.232051	0.265201
	Locus156	0.5	0.292893	0.707107	4	2	1.70711	0.604722	0.414214	0.473387
	Locus157	0	0	1	4	0	1	0	0	0
	Locus158	0	0	1	4	0	1	0	0	0
	Locus159	0	0	1	4	0	1	0	0	0
	Locus160	0.5	0.292893	0.707107	4	2	1.70711	0.604722	0.414214	0.473387
	Locus161	0.25	0.133975	0.866025	4	2	1.30217	0.393873	0.232051	0.265201
	Locus162	0.25	0.133975	0.866025	4	2	1.30217	0.393873	0.232051	0.265201
	Locus163	0.25	0.133975	0.866025	4	2	1.30217	0.393873	0.232051	0.265201
	Locus164	1	1	0	4	1	1	0	0	0
	Locus165	0.25	0.133975	0.866025	4	2	1.30217	0.393873	0.232051	0.265201
above 2000 m	Locus1	1	1	0	2	1	1	0	0	0
	Locus2	0	0	1	2	0	1	0	0	0
	Locus3	0.5	0.292893	0.707107	2	2	1.70711	0.604722	0.414214	0.552285
	Locus4	0.5	0.292893	0.707107	2	2	1.70711	0.604722	0.414214	0.552285
	Locus5	1	1	0	2	1	1	0	0	0
	Locus6	1	1	0	2	1	1	0	0	0
	Locus7	0	0	1	2	0	1	0	0	0
	Locus8	1	1	0	2	1	1	0	0	0
	Locus9	0	0	1	2	0	1	0	0	0
	Locus10	0	0	1	2	0	1	0	0	0
	Locus11	0.5	0.292893	0.707107	2	2	1.70711	0.604722	0.414214	0.552285
	Locus12	0	0	1	2	0	1	0	0	0
	Locus13	1	1	0	2	1	1	0	0	0
	Locus14	0	0	1	2	0	1	0	0	0
	Locus15	0.5	0.292893	0.707107	2	2	1.70711	0.604722	0.414214	0.552285
	Locus16	0	0	1	2	0	1	0	0	0
	Locus17	1	1	0	2	1	1	0	0	0
	Locus18	0	0	1	2	0	1	0	0	0
	Locus19	1	1	0	2	1	1	0	0	0
	Locus20	0	0	1	2	0	1	0	0	0
	Locus21	0	0	1	2	0	1	0	0	0
	Locus22	1	1	0	2	1	1	0	0	0
	Locus23	0	0	1	2	0	1	0	0	0
	Locus24	0	0	1	2	0	1	0	0	0
	Locus25	0.5	0.292893	0.707107	2	2	1.70711	0.604722	0.414214	0.552285
	Locus26	0.5	0.292893	0.707107	2	2	1.70711	0.604722	0.414214	0.552285
	Locus27	0	0	1	2	0	1	0	0	0
	Locus28	0	0	1	2	0	1	0	0	0
	Locus29	1	1	0	2	1	1	0	0	0
	Locus30	0	0	1	2	0	1	0	0	0
	Locus31	1	1	0	2	1	1	0	0	0
	Locus32	1	1	0	2	1	1	0	0	0
	Locus33	1	1	0	2	1	1	0	0	0
	Locus34	0.5	0.292893	0.707107	2	2	1.70711	0.604722	0.414214	0.552285
	Locus35	0	0	1	2	0	1	0	0	0
	Locus36	1	1	0	2	1	1	0	0	0
	Locus37	0	0	1	2	0	1	0	0	0
	Locus38	0	0	1	2	0	1	0	0	0
	Locus39	1	1	0	2	1	1	0	0	0
	Locus40	0.5	0.292893	0.707107	2	2	1.70711	0.604722	0.414214	0.552285
	Locus41	0	0	1	2	0	1	0	0	0
	Locus42	1	1	0	2	1	1	0	0	0
	Locus43	0.5	0.292893	0.707107	2	2	1.70711	0.604722	0.414214	0.552285
	Locus44	1	1	0	2	1	1	0	0	0
	Locus45	0.5	0.292893	0.707107	2	2	1.70711	0.604722	0.414214	0.552285
	Locus46	1	1	0	2	1	1	0	0	0
	Locus47	0	0	1	2	0	1	0	0	0
	Locus48	1	1	0	2	1	1	0	0	0
	Locus49	0	0	1	2	0	1	0	0	0
	Locus50	1	1	0	2	1	1	0	0	0
	Locus51	0	0	1	2	0	1	0	0	0
	Locus52	0	0	1	2	0	1	0	0	0
	Locus53	0	0	1	2	0	1	0	0	0
	Locus54	0	0	1	2	0	1	0	0	0
	Locus55	1	1	0	2	1	1	0	0	0
	Locus56	1	1	0	2	1	1	0	0	0
	Locus57	1	1	0	2	1	1	0	0	0
	Locus58	1	1	0	2	1	1	0	0	0
	Locus59	1	1	0	2	1	1	0	0	0
	Locus60	0.5	0.292893	0.707107	2	2	1.70711	0.604722	0.414214	0.552285
	Locus61	0.5	0.292893	0.707107	2	2	1.70711	0.604722	0.414214	0.552285
	Locus62	1	1	0	2	1	1	0	0	0
	Locus63	0	0	1	2	0	1	0	0	0
	Locus64	0	0	1	2	0	1	0	0	0
	Locus65	0	0	1	2	0	1	0	0	0
	Locus66	1	1	0	2	1	1	0	0	0
	Locus67	0	0	1	2	0	1	0	0	0
	Locus68	1	1	0	2	1	1	0	0	0
	Locus69	0	0	1	2	0	1	0	0	0
	Locus70	1	1	0	2	1	1	0	0	0
	Locus71	0	0	1	2	0	1	0	0	0
	Locus72	1	1	0	2	1	1	0	0	0
	Locus73	1	1	0	2	1	1	0	0	0
	Locus74	0	0	1	2	0	1	0	0	0
	Locus75	0	0	1	2	0	1	0	0	0
	Locus76	0	0	1	2	0	1	0	0	0
	Locus77	0	0	1	2	0	1	0	0	0
	Locus78	0	0	1	2	0	1	0	0	0
	Locus79	1	1	0	2	1	1	0	0	0
	Locus80	0	0	1	2	0	1	0	0	0
	Locus81	0.5	0.292893	0.707107	2	2	1.70711	0.604722	0.414214	0.552285
	Locus82	1	1	0	2	1	1	0	0	0
	Locus83	0.5	0.292893	0.707107	2	2	1.70711	0.604722	0.414214	0.552285
	Locus84	0	0	1	2	0	1	0	0	0
	Locus85	1	1	0	2	1	1	0	0	0
	Locus86	0	0	1	2	0	1	0	0	0
	Locus87	0.5	0.292893	0.707107	2	2	1.70711	0.604722	0.414214	0.552285
	Locus88	0	0	1	2	0	1	0	0	0
	Locus89	1	1	0	2	1	1	0	0	0
	Locus90	0	0	1	2	0	1	0	0	0
	Locus91	1	1	0	2	1	1	0	0	0
	Locus92	1	1	0	2	1	1	0	0	0
	Locus93	0	0	1	2	0	1	0	0	0
	Locus94	0	0	1	2	0	1	0	0	0
	Locus95	1	1	0	2	1	1	0	0	0
	Locus96	0	0	1	2	0	1	0	0	0
	Locus97	0	0	1	2	0	1	0	0	0
	Locus98	1	1	0	2	1	1	0	0	0
	Locus99	0.5	0.292893	0.707107	2	2	1.70711	0.604722	0.414214	0.552285
	Locus100	0	0	1	2	0	1	0	0	0
	Locus101	0.5	0.292893	0.707107	2	2	1.70711	0.604722	0.414214	0.552285
	Locus102	0	0	1	2	0	1	0	0	0
	Locus103	0	0	1	2	0	1	0	0	0
	Locus104	0	0	1	2	0	1	0	0	0
	Locus105	0	0	1	2	0	1	0	0	0
	Locus106	0	0	1	2	0	1	0	0	0
	Locus107	0.5	0.292893	0.707107	2	2	1.70711	0.604722	0.414214	0.552285
	Locus108	0	0	1	2	0	1	0	0	0
	Locus109	1	1	0	2	1	1	0	0	0
	Locus110	0	0	1	2	0	1	0	0	0
	Locus111	0	0	1	2	0	1	0	0	0
	Locus112	0	0	1	2	0	1	0	0	0
	Locus113	0	0	1	2	0	1	0	0	0
	Locus114	0	0	1	2	0	1	0	0	0
	Locus115	0	0	1	2	0	1	0	0	0
	Locus116	1	1	0	2	1	1	0	0	0
	Locus117	0	0	1	2	0	1	0	0	0
	Locus118	0	0	1	2	0	1	0	0	0
	Locus119	0	0	1	2	0	1	0	0	0
	Locus120	0	0	1	2	0	1	0	0	0
	Locus121	0	0	1	2	0	1	0	0	0
	Locus122	1	1	0	2	1	1	0	0	0
	Locus123	0.5	0.292893	0.707107	2	2	1.70711	0.604722	0.414214	0.552285
	Locus124	1	1	0	2	1	1	0	0	0
	Locus125	1	1	0	2	1	1	0	0	0
	Locus126	0.5	0.292893	0.707107	2	2	1.70711	0.604722	0.414214	0.552285
	Locus127	0	0	1	2	0	1	0	0	0
	Locus128	0.5	0.292893	0.707107	2	2	1.70711	0.604722	0.414214	0.552285
	Locus129	1	1	0	2	1	1	0	0	0
	Locus130	0	0	1	2	0	1	0	0	0
	Locus131	1	1	0	2	1	1	0	0	0
	Locus132	1	1	0	2	1	1	0	0	0
	Locus133	0	0	1	2	0	1	0	0	0
	Locus134	0.5	0.292893	0.707107	2	2	1.70711	0.604722	0.414214	0.552285
	Locus135	0	0	1	2	0	1	0	0	0
	Locus136	0	0	1	2	0	1	0	0	0
	Locus137	0	0	1	2	0	1	0	0	0
	Locus138	1	1	0	2	1	1	0	0	0
	Locus139	1	1	0	2	1	1	0	0	0
	Locus140	1	1	0	2	1	1	0	0	0
	Locus141	1	1	0	2	1	1	0	0	0
	Locus142	0	0	1	2	0	1	0	0	0
	Locus143	0	0	1	2	0	1	0	0	0
	Locus144	0	0	1	2	0	1	0	0	0
	Locus145	0	0	1	2	0	1	0	0	0
	Locus146	0	0	1	2	0	1	0	0	0
	Locus147	0	0	1	2	0	1	0	0	0
	Locus148	1	1	0	2	1	1	0	0	0
	Locus149	1	1	0	2	1	1	0	0	0
	Locus150	0.5	0.292893	0.707107	2	2	1.70711	0.604722	0.414214	0.552285
	Locus151	0	0	1	2	0	1	0	0	0
	Locus152	1	1	0	2	1	1	0	0	0
	Locus153	0.5	0.292893	0.707107	2	2	1.70711	0.604722	0.414214	0.552285
	Locus154	0.5	0.292893	0.707107	2	2	1.70711	0.604722	0.414214	0.552285
	Locus155	0	0	1	2	0	1	0	0	0
	Locus156	0.5	0.292893	0.707107	2	2	1.70711	0.604722	0.414214	0.552285
	Locus157	0	0	1	2	0	1	0	0	0
	Locus158	0.5	0.292893	0.707107	2	2	1.70711	0.604722	0.414214	0.552285
	Locus159	0	0	1	2	0	1	0	0	0
	Locus160	0	0	1	2	0	1	0	0	0
	Locus161	0	0	1	2	0	1	0	0	0
	Locus162	0	0	1	2	0	1	0	0	0
	Locus163	0	0	1	2	0	1	0	0	0
	Locus164	1	1	0	2	1	1	0	0	0
	Locus165	0	0	1	2	0	1	0	0	0
Mean and SE over Loci for each Pop
Pop					N	Na	Ne	I	He	uHe
1000 m	Mean				6	1.06061	1.2666	0.231409	0.15451	0.168556
	SE				0	0.0707352	0.0285834	0.0219189	0.015285	0.0166745
1000-2000 m	Mean				4	1.4303	1.37844	0.341121	0.225888	0.258158
	SE				0	0.0644634	0.0281443	0.0211944	0.0148098	0.0169255
above 2000 m	Mean				2	0.654545	1.11571	0.0989545	0.0677804	0.0903739
	SE				0	0.0580889	0.0204268	0.0174691	0.0119657	0.0159543
Grand Mean and SE over Loci and Pops
					N	Na	Ne	I	He	uHe
Total	Mean				4	1.04848	1.25358	0.223828	0.149393	0.172363
	SE				0.0734718	0.0398765	0.0157385	0.0125096	0.00862728	0.0100075
Percentage of Polymorphic Loci
Population	%P
1000 m	0.442424
1000-2000 m	0.648485
above 2000 m	0.163636
Mean	0.418182
SE	0.140488
Na = No. of Different Alleles
Ne = No. of Effective Alleles = 1 / (p^2 + q^2)
I = Shannon's Information Index = -1* (p * Ln (p) + q * Ln(q))
He = Expected Heterozygosity = 2 * p * q
uHe = Unbiased Expected Heterozygosity = (2N / (2N-1)) * He
Where for Diploid Binary data and assuming Hardy-Weinberg Equilibrium, q = (1 - Band Freq.)^0.5 and p = 1 - q.
Warning! Results should be treated with caution given the following:
The sample size in the population 1000-2000 m is less than 5!
The sample size in the population above 2000 m is less than 5!

## Sheet: BAPT
Band Patterns for Binary (Diploid) Data
Data Sheet	Лист1
Data Title	Random binary data with XY coords
No. Loci	165
No. Samples	12
No. Pops.	3
Total Band Patterns for Binary (Diploid) Data by Populations
Population	1000 m	1000-2000 m	above 2000 m
No. Bands	102	129	81
No. Bands Freq. >= 5%	102	129	81
No. Private Bands	10	36	2
No. LComm Bands (<=25%)	0	0	0
No. LComm Bands (<=50%)	0	0	0
Mean He	0.15451	0.225888	0.0677804
SE of Mean He	0.015285	0.0148098	0.0119657
Mean uHe	0.168556	0.258158	0.0903739
SE of Mean uHe	0.0166745	0.0169255	0.0159543
No. Bands = No. of Different Bands
No. Bands Freq. >= 5% = No. of Different Bands with a Frequency >= 5%
No. Private Bands = No. of Bands Unique to a Single Population
No. LComm Bands (<=25%) = No. of Locally Common Bands (Freq. >= 5%) Found in 25% or Fewer Populations
No. LComm Bands (<=50%) = No. of Locally Common Bands (Freq. >= 5%) Found in 50% or Fewer Populations
He = Expected Heterozygosity = 2 * p * q
uHe = Unbiased Expected Heterozygosity = (2N / (2N-1)) * He
Where for Diploid Binary data and assuming Hardy-Weinberg Equilibrium, q = (1 - Band Freq.)^0.5 and p = 1 - q.
Warning! Results should be treated with caution given the following:
The sample size in the population 1000-2000 m is less than 5!
The sample size in the population above 2000 m is less than 5!

## Sheet: SbySN
Summary of Pairwise Population Nei Genetic Distance and Identity
*With Step by Step option
Data Sheet	Лист1
Data Title	Random binary data with XY coords
No. Loci	165
No. Samples	12
No. Pops.	3
Pairwise Pops: 1000 m versus 1000-2000 m
		1000 m	1000-2000 m
Locus	Allele	x	y	x^2	y^2	xy	2Nx	xUb	2Ny	yUb
Locus1	p	0.292893	0.292893	0.0857864	0.0857864	0.0857864
	q	0.707107	0.707107	0.5	0.5	0.5
Sum over Locus1				0.585786	0.585786	0.585786	12	0.548131	8	0.526613
Locus2	p	0.183503	0.292893	0.0336735	0.0857864	0.0537469
	q	0.816497	0.707107	0.666667	0.5	0.57735
Sum over Locus2				0.70034	0.585786	0.631097	12	0.673098	8	0.526613
Locus3	p	0.292893	0.292893	0.0857864	0.0857864	0.0857864
	q	0.707107	0.707107	0.5	0.5	0.5
Sum over Locus3				0.585786	0.585786	0.585786	12	0.548131	8	0.526613
Locus4	p	0.42265	0.292893	0.178633	0.0857864	0.123791
	q	0.57735	0.707107	0.333333	0.5	0.408248
Sum over Locus4				0.511966	0.585786	0.53204	12	0.467599	8	0.526613
Locus5	p	1	1	1	1	1
	q	0	0	0	0	0
Sum over Locus5				1	1	1	12	1	8	1
Locus6	p	1	1	1	1	1
	q	0	0	0	0	0
Sum over Locus6				1	1	1	12	1	8	1
Locus7	p	0	0.292893	0	0.0857864	0
	q	1	0.707107	1	0.5	0.707107
Sum over Locus7				1	0.585786	0.707107	12	1	8	0.526613
Locus8	p	0.591752	1	0.35017	1	0.591752
	q	0.408248	0	0.166667	0	0
Sum over Locus8				0.516837	1	0.591752	12	0.472913	8	1
Locus9	p	0	0	0	0	0
	q	1	1	1	1	1
Sum over Locus9				1	1	1	12	1	8	1
Locus10	p	0.183503	0	0.0336735	0	0
	q	0.816497	1	0.666667	1	0.816497
Sum over Locus10				0.70034	1	0.816497	12	0.673098	8	1
Locus11	p	0.0871291	0	0.00759147	0	0
	q	0.912871	1	0.833333	1	0.912871
Sum over Locus11				0.840925	1	0.912871	12	0.826463	8	1
Locus12	p	0.0871291	0	0.00759147	0	0
	q	0.912871	1	0.833333	1	0.912871
Sum over Locus12				0.840925	1	0.912871	12	0.826463	8	1
Locus13	p	0.42265	1	0.178633	1	0.42265
	q	0.57735	0	0.333333	0	0
Sum over Locus13				0.511966	1	0.42265	12	0.467599	8	1
Locus14	p	0.591752	0.5	0.35017	0.25	0.295876
	q	0.408248	0.5	0.166667	0.25	0.204124
Sum over Locus14				0.516837	0.5	0.5	12	0.472913	8	0.428571
Locus15	p	0.591752	0.5	0.35017	0.25	0.295876
	q	0.408248	0.5	0.166667	0.25	0.204124
Sum over Locus15				0.516837	0.5	0.5	12	0.472913	8	0.428571
Locus16	p	0.42265	0.133975	0.178633	0.0179492	0.0566243
	q	0.57735	0.866025	0.333333	0.75	0.5
Sum over Locus16				0.511966	0.767949	0.556624	12	0.467599	8	0.734799
Locus17	p	0.183503	0.292893	0.0336735	0.0857864	0.0537469
	q	0.816497	0.707107	0.666667	0.5	0.57735
Sum over Locus17				0.70034	0.585786	0.631097	12	0.673098	8	0.526613
Locus18	p	0.42265	0.292893	0.178633	0.0857864	0.123791
	q	0.57735	0.707107	0.333333	0.5	0.408248
Sum over Locus18				0.511966	0.585786	0.53204	12	0.467599	8	0.526613
Locus19	p	1	1	1	1	1
	q	0	0	0	0	0
Sum over Locus19				1	1	1	12	1	8	1
Locus20	p	0	0.5	0	0.25	0
	q	1	0.5	1	0.25	0.5
Sum over Locus20				1	0.5	0.5	12	1	8	0.428571
Locus21	p	0	0	0	0	0
	q	1	1	1	1	1
Sum over Locus21				1	1	1	12	1	8	1
Locus22	p	0.0871291	0.5	0.00759147	0.25	0.0435645
	q	0.912871	0.5	0.833333	0.25	0.456435
Sum over Locus22				0.840925	0.5	0.5	12	0.826463	8	0.428571
Locus23	p	0	0.292893	0	0.0857864	0
	q	1	0.707107	1	0.5	0.707107
Sum over Locus23				1	0.585786	0.707107	12	1	8	0.526613
Locus24	p	0.0871291	0	0.00759147	0	0
	q	0.912871	1	0.833333	1	0.912871
Sum over Locus24				0.840925	1	0.912871	12	0.826463	8	1
Locus25	p	0.292893	0.133975	0.0857864	0.0179492	0.0392403
	q	0.707107	0.866025	0.5	0.75	0.612372
Sum over Locus25				0.585786	0.767949	0.651613	12	0.548131	8	0.734799
Locus26	p	0	0.292893	0	0.0857864	0
	q	1	0.707107	1	0.5	0.707107
Sum over Locus26				1	0.585786	0.707107	12	1	8	0.526613
Locus27	p	0	0	0	0	0
	q	1	1	1	1	1
Sum over Locus27				1	1	1	12	1	8	1
Locus28	p	0.0871291	0	0.00759147	0	0
	q	0.912871	1	0.833333	1	0.912871
Sum over Locus28				0.840925	1	0.912871	12	0.826463	8	1
Locus29	p	0.42265	0.292893	0.178633	0.0857864	0.123791
	q	0.57735	0.707107	0.333333	0.5	0.408248
Sum over Locus29				0.511966	0.585786	0.53204	12	0.467599	8	0.526613
Locus30	p	0.0871291	0.133975	0.00759147	0.0179492	0.0116731
	q	0.912871	0.866025	0.833333	0.75	0.790569
Sum over Locus30				0.840925	0.767949	0.802242	12	0.826463	8	0.734799
Locus31	p	0.183503	0.292893	0.0336735	0.0857864	0.0537469
	q	0.816497	0.707107	0.666667	0.5	0.57735
Sum over Locus31				0.70034	0.585786	0.631097	12	0.673098	8	0.526613
Locus32	p	1	1	1	1	1
	q	0	0	0	0	0
Sum over Locus32				1	1	1	12	1	8	1
Locus33	p	0.292893	0.133975	0.0857864	0.0179492	0.0392403
	q	0.707107	0.866025	0.5	0.75	0.612372
Sum over Locus33				0.585786	0.767949	0.651613	12	0.548131	8	0.734799
Locus34	p	0.292893	0.133975	0.0857864	0.0179492	0.0392403
	q	0.707107	0.866025	0.5	0.75	0.612372
Sum over Locus34				0.585786	0.767949	0.651613	12	0.548131	8	0.734799
Locus35	p	0	0.5	0	0.25	0
	q	1	0.5	1	0.25	0.5
Sum over Locus35				1	0.5	0.5	12	1	8	0.428571
Locus36	p	0.292893	0.133975	0.0857864	0.0179492	0.0392403
	q	0.707107	0.866025	0.5	0.75	0.612372
Sum over Locus36				0.585786	0.767949	0.651613	12	0.548131	8	0.734799
Locus37	p	0.183503	0.133975	0.0336735	0.0179492	0.0245848
	q	0.816497	0.866025	0.666667	0.75	0.707107
Sum over Locus37				0.70034	0.767949	0.731692	12	0.673098	8	0.734799
Locus38	p	0.0871291	0.5	0.00759147	0.25	0.0435645
	q	0.912871	0.5	0.833333	0.25	0.456435
Sum over Locus38				0.840925	0.5	0.5	12	0.826463	8	0.428571
Locus39	p	1	1	1	1	1
	q	0	0	0	0	0
Sum over Locus39				1	1	1	12	1	8	1
Locus40	p	0.292893	0.292893	0.0857864	0.0857864	0.0857864
	q	0.707107	0.707107	0.5	0.5	0.5
Sum over Locus40				0.585786	0.585786	0.585786	12	0.548131	8	0.526613
Locus41	p	0	0	0	0	0
	q	1	1	1	1	1
Sum over Locus41				1	1	1	12	1	8	1
Locus42	p	1	1	1	1	1
	q	0	0	0	0	0
Sum over Locus42				1	1	1	12	1	8	1
Locus43	p	0.292893	0.5	0.0857864	0.25	0.146447
	q	0.707107	0.5	0.5	0.25	0.353553
Sum over Locus43				0.585786	0.5	0.5	12	0.548131	8	0.428571
Locus44	p	0.591752	0.5	0.35017	0.25	0.295876
	q	0.408248	0.5	0.166667	0.25	0.204124
Sum over Locus44				0.516837	0.5	0.5	12	0.472913	8	0.428571
Locus45	p	0.292893	0.292893	0.0857864	0.0857864	0.0857864
	q	0.707107	0.707107	0.5	0.5	0.5
Sum over Locus45				0.585786	0.585786	0.585786	12	0.548131	8	0.526613
Locus46	p	0.42265	0.133975	0.178633	0.0179492	0.0566243
	q	0.57735	0.866025	0.333333	0.75	0.5
Sum over Locus46				0.511966	0.767949	0.556624	12	0.467599	8	0.734799
Locus47	p	0	0.133975	0	0.0179492	0
	q	1	0.866025	1	0.75	0.866025
Sum over Locus47				1	0.767949	0.866025	12	1	8	0.734799
Locus48	p	1	1	1	1	1
	q	0	0	0	0	0
Sum over Locus48				1	1	1	12	1	8	1
Locus49	p	0	0.5	0	0.25	0
	q	1	0.5	1	0.25	0.5
Sum over Locus49				1	0.5	0.5	12	1	8	0.428571
Locus50	p	0.591752	0.133975	0.35017	0.0179492	0.0792797
	q	0.408248	0.866025	0.166667	0.75	0.353553
Sum over Locus50				0.516837	0.767949	0.432833	12	0.472913	8	0.734799
Locus51	p	0.0871291	0	0.00759147	0	0
	q	0.912871	1	0.833333	1	0.912871
Sum over Locus51				0.840925	1	0.912871	12	0.826463	8	1
Locus52	p	0	0	0	0	0
	q	1	1	1	1	1
Sum over Locus52				1	1	1	12	1	8	1
Locus53	p	0.0871291	0	0.00759147	0	0
	q	0.912871	1	0.833333	1	0.912871
Sum over Locus53				0.840925	1	0.912871	12	0.826463	8	1
Locus54	p	0	0.133975	0	0.0179492	0
	q	1	0.866025	1	0.75	0.866025
Sum over Locus54				1	0.767949	0.866025	12	1	8	0.734799
Locus55	p	1	1	1	1	1
	q	0	0	0	0	0
Sum over Locus55				1	1	1	12	1	8	1
Locus56	p	1	1	1	1	1
	q	0	0	0	0	0
Sum over Locus56				1	1	1	12	1	8	1
Locus57	p	0.591752	0.133975	0.35017	0.0179492	0.0792797
	q	0.408248	0.866025	0.166667	0.75	0.353553
Sum over Locus57				0.516837	0.767949	0.432833	12	0.472913	8	0.734799
Locus58	p	1	1	1	1	1
	q	0	0	0	0	0
Sum over Locus58				1	1	1	12	1	8	1
Locus59	p	0.591752	0.5	0.35017	0.25	0.295876
	q	0.408248	0.5	0.166667	0.25	0.204124
Sum over Locus59				0.516837	0.5	0.5	12	0.472913	8	0.428571
Locus60	p	0.183503	0.292893	0.0336735	0.0857864	0.0537469
	q	0.816497	0.707107	0.666667	0.5	0.57735
Sum over Locus60				0.70034	0.585786	0.631097	12	0.673098	8	0.526613
Locus61	p	0	0	0	0	0
	q	1	1	1	1	1
Sum over Locus61				1	1	1	12	1	8	1
Locus62	p	1	1	1	1	1
	q	0	0	0	0	0
Sum over Locus62				1	1	1	12	1	8	1
Locus63	p	0	0.133975	0	0.0179492	0
	q	1	0.866025	1	0.75	0.866025
Sum over Locus63				1	0.767949	0.866025	12	1	8	0.734799
Locus64	p	0	0	0	0	0
	q	1	1	1	1	1
Sum over Locus64				1	1	1	12	1	8	1
Locus65	p	0	0.292893	0	0.0857864	0
	q	1	0.707107	1	0.5	0.707107
Sum over Locus65				1	0.585786	0.707107	12	1	8	0.526613
Locus66	p	1	1	1	1	1
	q	0	0	0	0	0
Sum over Locus66				1	1	1	12	1	8	1
Locus67	p	0	0.133975	0	0.0179492	0
	q	1	0.866025	1	0.75	0.866025
Sum over Locus67				1	0.767949	0.866025	12	1	8	0.734799
Locus68	p	0.591752	0.5	0.35017	0.25	0.295876
	q	0.408248	0.5	0.166667	0.25	0.204124
Sum over Locus68				0.516837	0.5	0.5	12	0.472913	8	0.428571
Locus69	p	0	0.133975	0	0.0179492	0
	q	1	0.866025	1	0.75	0.866025
Sum over Locus69				1	0.767949	0.866025	12	1	8	0.734799
Locus70	p	1	0.5	1	0.25	0.5
	q	0	0.5	0	0.25	0
Sum over Locus70				1	0.5	0.5	12	1	8	0.428571
Locus71	p	0	0	0	0	0
	q	1	1	1	1	1
Sum over Locus71				1	1	1	12	1	8	1
Locus72	p	1	0.5	1	0.25	0.5
	q	0	0.5	0	0.25	0
Sum over Locus72				1	0.5	0.5	12	1	8	0.428571
Locus73	p	1	0.5	1	0.25	0.5
	q	0	0.5	0	0.25	0
Sum over Locus73				1	0.5	0.5	12	1	8	0.428571
Locus74	p	0	0.292893	0	0.0857864	0
	q	1	0.707107	1	0.5	0.707107
Sum over Locus74				1	0.585786	0.707107	12	1	8	0.526613
Locus75	p	0	0.133975	0	0.0179492	0
	q	1	0.866025	1	0.75	0.866025
Sum over Locus75				1	0.767949	0.866025	12	1	8	0.734799
Locus76	p	0	0	0	0	0
	q	1	1	1	1	1
Sum over Locus76				1	1	1	12	1	8	1
Locus77	p	0	0	0	0	0
	q	1	1	1	1	1
Sum over Locus77				1	1	1	12	1	8	1
Locus78	p	0	0.133975	0	0.0179492	0
	q	1	0.866025	1	0.75	0.866025
Sum over Locus78				1	0.767949	0.866025	12	1	8	0.734799
Locus79	p	1	0.5	1	0.25	0.5
	q	0	0.5	0	0.25	0
Sum over Locus79				1	0.5	0.5	12	1	8	0.428571
Locus80	p	0	0	0	0	0
	q	1	1	1	1	1
Sum over Locus80				1	1	1	12	1	8	1
Locus81	p	0.42265	0.5	0.178633	0.25	0.211325
	q	0.57735	0.5	0.333333	0.25	0.288675
Sum over Locus81				0.511966	0.5	0.5	12	0.467599	8	0.428571
Locus82	p	0.591752	0.5	0.35017	0.25	0.295876
	q	0.408248	0.5	0.166667	0.25	0.204124
Sum over Locus82				0.516837	0.5	0.5	12	0.472913	8	0.428571
Locus83	p	0.292893	0.292893	0.0857864	0.0857864	0.0857864
	q	0.707107	0.707107	0.5	0.5	0.5
Sum over Locus83				0.585786	0.585786	0.585786	12	0.548131	8	0.526613
Locus84	p	0.0871291	0.292893	0.00759147	0.0857864	0.0255195
	q	0.912871	0.707107	0.833333	0.5	0.645497
Sum over Locus84				0.840925	0.585786	0.671017	12	0.826463	8	0.526613
Locus85	p	0.183503	0.133975	0.0336735	0.0179492	0.0245848
	q	0.816497	0.866025	0.666667	0.75	0.707107
Sum over Locus85				0.70034	0.767949	0.731692	12	0.673098	8	0.734799
Locus86	p	0	0	0	0	0
	q	1	1	1	1	1
Sum over Locus86				1	1	1	12	1	8	1
Locus87	p	0.183503	0	0.0336735	0	0
	q	0.816497	1	0.666667	1	0.816497
Sum over Locus87				0.70034	1	0.816497	12	0.673098	8	1
Locus88	p	0.0871291	0.133975	0.00759147	0.0179492	0.0116731
	q	0.912871	0.866025	0.833333	0.75	0.790569
Sum over Locus88				0.840925	0.767949	0.802242	12	0.826463	8	0.734799
Locus89	p	0.591752	0.5	0.35017	0.25	0.295876
	q	0.408248	0.5	0.166667	0.25	0.204124
Sum over Locus89				0.516837	0.5	0.5	12	0.472913	8	0.428571
Locus90	p	0	0.292893	0	0.0857864	0
	q	1	0.707107	1	0.5	0.707107
Sum over Locus90				1	0.585786	0.707107	12	1	8	0.526613
Locus91	p	1	1	1	1	1
	q	0	0	0	0	0
Sum over Locus91				1	1	1	12	1	8	1
Locus92	p	0.591752	0.292893	0.35017	0.0857864	0.17332
	q	0.408248	0.707107	0.166667	0.5	0.288675
Sum over Locus92				0.516837	0.585786	0.461995	12	0.472913	8	0.526613
Locus93	p	0	0.292893	0	0.0857864	0
	q	1	0.707107	1	0.5	0.707107
Sum over Locus93				1	0.585786	0.707107	12	1	8	0.526613
Locus94	p	0	0.133975	0	0.0179492	0
	q	1	0.866025	1	0.75	0.866025
Sum over Locus94				1	0.767949	0.866025	12	1	8	0.734799
Locus95	p	0.591752	0.292893	0.35017	0.0857864	0.17332
	q	0.408248	0.707107	0.166667	0.5	0.288675
Sum over Locus95				0.516837	0.585786	0.461995	12	0.472913	8	0.526613
Locus96	p	0	0.133975	0	0.0179492	0
	q	1	0.866025	1	0.75	0.866025
Sum over Locus96				1	0.767949	0.866025	12	1	8	0.734799
Locus97	p	0	0.133975	0	0.0179492	0
	q	1	0.866025	1	0.75	0.866025
Sum over Locus97				1	0.767949	0.866025	12	1	8	0.734799
Locus98	p	0.42265	0	0.178633	0	0
	q	0.57735	1	0.333333	1	0.57735
Sum over Locus98				0.511966	1	0.57735	12	0.467599	8	1
Locus99	p	0.0871291	0	0.00759147	0	0
	q	0.912871	1	0.833333	1	0.912871
Sum over Locus99				0.840925	1	0.912871	12	0.826463	8	1
Locus100	p	0.183503	0.133975	0.0336735	0.0179492	0.0245848
	q	0.816497	0.866025	0.666667	0.75	0.707107
Sum over Locus100				0.70034	0.767949	0.731692	12	0.673098	8	0.734799
Locus101	p	0	0.292893	0	0.0857864	0
	q	1	0.707107	1	0.5	0.707107
Sum over Locus101				1	0.585786	0.707107	12	1	8	0.526613
Locus102	p	0	0.133975	0	0.0179492	0
	q	1	0.866025	1	0.75	0.866025
Sum over Locus102				1	0.767949	0.866025	12	1	8	0.734799
Locus103	p	0	0	0	0	0
	q	1	1	1	1	1
Sum over Locus103				1	1	1	12	1	8	1
Locus104	p	0.0871291	0.133975	0.00759147	0.0179492	0.0116731
	q	0.912871	0.866025	0.833333	0.75	0.790569
Sum over Locus104				0.840925	0.767949	0.802242	12	0.826463	8	0.734799
Locus105	p	0	0	0	0	0
	q	1	1	1	1	1
Sum over Locus105				1	1	1	12	1	8	1
Locus106	p	0	0.133975	0	0.0179492	0
	q	1	0.866025	1	0.75	0.866025
Sum over Locus106				1	0.767949	0.866025	12	1	8	0.734799
Locus107	p	0	0.133975	0	0.0179492	0
	q	1	0.866025	1	0.75	0.866025
Sum over Locus107				1	0.767949	0.866025	12	1	8	0.734799
Locus108	p	0	0.133975	0	0.0179492	0
	q	1	0.866025	1	0.75	0.866025
Sum over Locus108				1	0.767949	0.866025	12	1	8	0.734799
Locus109	p	0.591752	0.292893	0.35017	0.0857864	0.17332
	q	0.408248	0.707107	0.166667	0.5	0.288675
Sum over Locus109				0.516837	0.585786	0.461995	12	0.472913	8	0.526613
Locus110	p	0.0871291	0.133975	0.00759147	0.0179492	0.0116731
	q	0.912871	0.866025	0.833333	0.75	0.790569
Sum over Locus110				0.840925	0.767949	0.802242	12	0.826463	8	0.734799
Locus111	p	0	0.133975	0	0.0179492	0
	q	1	0.866025	1	0.75	0.866025
Sum over Locus111				1	0.767949	0.866025	12	1	8	0.734799
Locus112	p	0	0	0	0	0
	q	1	1	1	1	1
Sum over Locus112				1	1	1	12	1	8	1
Locus113	p	0	0	0	0	0
	q	1	1	1	1	1
Sum over Locus113				1	1	1	12	1	8	1
Locus114	p	0	0	0	0	0
	q	1	1	1	1	1
Sum over Locus114				1	1	1	12	1	8	1
Locus115	p	0.0871291	0	0.00759147	0	0
	q	0.912871	1	0.833333	1	0.912871
Sum over Locus115				0.840925	1	0.912871	12	0.826463	8	1
Locus116	p	1	0.292893	1	0.0857864	0.292893
	q	0	0.707107	0	0.5	0
Sum over Locus116				1	0.585786	0.292893	12	1	8	0.526613
Locus117	p	0	0.133975	0	0.0179492	0
	q	1	0.866025	1	0.75	0.866025
Sum over Locus117				1	0.767949	0.866025	12	1	8	0.734799
Locus118	p	0	0	0	0	0
	q	1	1	1	1	1
Sum over Locus118				1	1	1	12	1	8	1
Locus119	p	0	0.133975	0	0.0179492	0
	q	1	0.866025	1	0.75	0.866025
Sum over Locus119				1	0.767949	0.866025	12	1	8	0.734799
Locus120	p	0	0	0	0	0
	q	1	1	1	1	1
Sum over Locus120				1	1	1	12	1	8	1
Locus121	p	0	0.133975	0	0.0179492	0
	q	1	0.866025	1	0.75	0.866025
Sum over Locus121				1	0.767949	0.866025	12	1	8	0.734799
Locus122	p	1	0.5	1	0.25	0.5
	q	0	0.5	0	0.25	0
Sum over Locus122				1	0.5	0.5	12	1	8	0.428571
Locus123	p	0	0.292893	0	0.0857864	0
	q	1	0.707107	1	0.5	0.707107
Sum over Locus123				1	0.585786	0.707107	12	1	8	0.526613
Locus124	p	0.42265	0.5	0.178633	0.25	0.211325
	q	0.57735	0.5	0.333333	0.25	0.288675
Sum over Locus124				0.511966	0.5	0.5	12	0.467599	8	0.428571
Locus125	p	1	1	1	1	1
	q	0	0	0	0	0
Sum over Locus125				1	1	1	12	1	8	1
Locus126	p	1	0.5	1	0.25	0.5
	q	0	0.5	0	0.25	0
Sum over Locus126				1	0.5	0.5	12	1	8	0.428571
Locus127	p	0	0	0	0	0
	q	1	1	1	1	1
Sum over Locus127				1	1	1	12	1	8	1
Locus128	p	0.42265	0.133975	0.178633	0.0179492	0.0566243
	q	0.57735	0.866025	0.333333	0.75	0.5
Sum over Locus128				0.511966	0.767949	0.556624	12	0.467599	8	0.734799
Locus129	p	1	1	1	1	1
	q	0	0	0	0	0
Sum over Locus129				1	1	1	12	1	8	1
Locus130	p	0.292893	0.133975	0.0857864	0.0179492	0.0392403
	q	0.707107	0.866025	0.5	0.75	0.612372
Sum over Locus130				0.585786	0.767949	0.651613	12	0.548131	8	0.734799
Locus131	p	0.591752	1	0.35017	1	0.591752
	q	0.408248	0	0.166667	0	0
Sum over Locus131				0.516837	1	0.591752	12	0.472913	8	1
Locus132	p	1	1	1	1	1
	q	0	0	0	0	0
Sum over Locus132				1	1	1	12	1	8	1
Locus133	p	0.183503	0.133975	0.0336735	0.0179492	0.0245848
	q	0.816497	0.866025	0.666667	0.75	0.707107
Sum over Locus133				0.70034	0.767949	0.731692	12	0.673098	8	0.734799
Locus134	p	0.0871291	0.133975	0.00759147	0.0179492	0.0116731
	q	0.912871	0.866025	0.833333	0.75	0.790569
Sum over Locus134				0.840925	0.767949	0.802242	12	0.826463	8	0.734799
Locus135	p	0	0.133975	0	0.0179492	0
	q	1	0.866025	1	0.75	0.866025
Sum over Locus135				1	0.767949	0.866025	12	1	8	0.734799
Locus136	p	0	0.133975	0	0.0179492	0
	q	1	0.866025	1	0.75	0.866025
Sum over Locus136				1	0.767949	0.866025	12	1	8	0.734799
Locus137	p	0.42265	0	0.178633	0	0
	q	0.57735	1	0.333333	1	0.57735
Sum over Locus137				0.511966	1	0.57735	12	0.467599	8	1
Locus138	p	1	0.5	1	0.25	0.5
	q	0	0.5	0	0.25	0
Sum over Locus138				1	0.5	0.5	12	1	8	0.428571
Locus139	p	0.591752	0.292893	0.35017	0.0857864	0.17332
	q	0.408248	0.707107	0.166667	0.5	0.288675
Sum over Locus139				0.516837	0.585786	0.461995	12	0.472913	8	0.526613
Locus140	p	0.591752	0.5	0.35017	0.25	0.295876
	q	0.408248	0.5	0.166667	0.25	0.204124
Sum over Locus140				0.516837	0.5	0.5	12	0.472913	8	0.428571
Locus141	p	1	0.292893	1	0.0857864	0.292893
	q	0	0.707107	0	0.5	0
Sum over Locus141				1	0.585786	0.292893	12	1	8	0.526613
Locus142	p	0	0.133975	0	0.0179492	0
	q	1	0.866025	1	0.75	0.866025
Sum over Locus142				1	0.767949	0.866025	12	1	8	0.734799
Locus143	p	0	0.292893	0	0.0857864	0
	q	1	0.707107	1	0.5	0.707107
Sum over Locus143				1	0.585786	0.707107	12	1	8	0.526613
Locus144	p	0.42265	0.292893	0.178633	0.0857864	0.123791
	q	0.57735	0.707107	0.333333	0.5	0.408248
Sum over Locus144				0.511966	0.585786	0.53204	12	0.467599	8	0.526613
Locus145	p	0.183503	0	0.0336735	0	0
	q	0.816497	1	0.666667	1	0.816497
Sum over Locus145				0.70034	1	0.816497	12	0.673098	8	1
Locus146	p	0	0.133975	0	0.0179492	0
	q	1	0.866025	1	0.75	0.866025
Sum over Locus146				1	0.767949	0.866025	12	1	8	0.734799
Locus147	p	0.0871291	0.133975	0.00759147	0.0179492	0.0116731
	q	0.912871	0.866025	0.833333	0.75	0.790569
Sum over Locus147				0.840925	0.767949	0.802242	12	0.826463	8	0.734799
Locus148	p	1	1	1	1	1
	q	0	0	0	0	0
Sum over Locus148				1	1	1	12	1	8	1
Locus149	p	1	1	1	1	1
	q	0	0	0	0	0
Sum over Locus149				1	1	1	12	1	8	1
Locus150	p	0.183503	0.292893	0.0336735	0.0857864	0.0537469
	q	0.816497	0.707107	0.666667	0.5	0.57735
Sum over Locus150				0.70034	0.585786	0.631097	12	0.673098	8	0.526613
Locus151	p	0.0871291	0.133975	0.00759147	0.0179492	0.0116731
	q	0.912871	0.866025	0.833333	0.75	0.790569
Sum over Locus151				0.840925	0.767949	0.802242	12	0.826463	8	0.734799
Locus152	p	1	0.5	1	0.25	0.5
	q	0	0.5	0	0.25	0
Sum over Locus152				1	0.5	0.5	12	1	8	0.428571
Locus153	p	0	0.133975	0	0.0179492	0
	q	1	0.866025	1	0.75	0.866025
Sum over Locus153				1	0.767949	0.866025	12	1	8	0.734799
Locus154	p	0.0871291	0.133975	0.00759147	0.0179492	0.0116731
	q	0.912871	0.866025	0.833333	0.75	0.790569
Sum over Locus154				0.840925	0.767949	0.802242	12	0.826463	8	0.734799
Locus155	p	0	0.133975	0	0.0179492	0
	q	1	0.866025	1	0.75	0.866025
Sum over Locus155				1	0.767949	0.866025	12	1	8	0.734799
Locus156	p	0.0871291	0.292893	0.00759147	0.0857864	0.0255195
	q	0.912871	0.707107	0.833333	0.5	0.645497
Sum over Locus156				0.840925	0.585786	0.671017	12	0.826463	8	0.526613
Locus157	p	0.0871291	0	0.00759147	0	0
	q	0.912871	1	0.833333	1	0.912871
Sum over Locus157				0.840925	1	0.912871	12	0.826463	8	1
Locus158	p	0	0	0	0	0
	q	1	1	1	1	1
Sum over Locus158				1	1	1	12	1	8	1
Locus159	p	0	0	0	0	0
	q	1	1	1	1	1
Sum over Locus159				1	1	1	12	1	8	1
Locus160	p	0.292893	0.292893	0.0857864	0.0857864	0.0857864
	q	0.707107	0.707107	0.5	0.5	0.5
Sum over Locus160				0.585786	0.585786	0.585786	12	0.548131	8	0.526613
Locus161	p	0	0.133975	0	0.0179492	0
	q	1	0.866025	1	0.75	0.866025
Sum over Locus161				1	0.767949	0.866025	12	1	8	0.734799
Locus162	p	0	0.133975	0	0.0179492	0
	q	1	0.866025	1	0.75	0.866025
Sum over Locus162				1	0.767949	0.866025	12	1	8	0.734799
Locus163	p	0	0.133975	0	0.0179492	0
	q	1	0.866025	1	0.75	0.866025
Sum over Locus163				1	0.767949	0.866025	12	1	8	0.734799
Locus164	p	1	1	1	1	1
	q	0	0	0	0	0
Sum over Locus164				1	1	1	12	1	8	1
Locus165	p	0	0.133975	0	0.0179492	0
	q	1	0.866025	1	0.75	0.866025
Sum over Locus165				1	0.767949	0.866025	12	1	8	0.734799
				Jx	Jy	JxJy		JxUb		JyUb
Sum over Loci				139.506	127.728	125.458		137.188		122.404
	JxJy	(Jx*Jy)^0.5)		JxJy / ((Jx *Jy)^0.5)			(JxUb*JyUb)^0.5)		JxJy / ((JxUb* JyUb)^0.5)
	125.458	133.487		0.939853			129.585		0.968152
Nei Genetic Identity	0.939853
Nei Unbiased Genetic Identity	0.968152
Nei Genetic Distance	0.0620321
Nei Unbiased Genetic Distance	0.0323658
Pairwise Pops: 1000 m versus above 2000 m
		1000 m	above 2000 m
Locus	Allele	x	y	x^2	y^2	xy	2Nx	xUb	2Ny	yUb
Locus1	p	0.292893	1	0.0857864	1	0.292893
	q	0.707107	0	0.5	0	0
Sum over Locus1				0.585786	1	0.292893	12	0.548131	4	1
Locus2	p	0.183503	0	0.0336735	0	0
	q	0.816497	1	0.666667	1	0.816497
Sum over Locus2				0.70034	1	0.816497	12	0.673098	4	1
Locus3	p	0.292893	0.292893	0.0857864	0.0857864	0.0857864
	q	0.707107	0.707107	0.5	0.5	0.5
Sum over Locus3				0.585786	0.585786	0.585786	12	0.548131	4	0.447715
Locus4	p	0.42265	0.292893	0.178633	0.0857864	0.123791
	q	0.57735	0.707107	0.333333	0.5	0.408248
Sum over Locus4				0.511966	0.585786	0.53204	12	0.467599	4	0.447715
Locus5	p	1	1	1	1	1
	q	0	0	0	0	0
Sum over Locus5				1	1	1	12	1	4	1
Locus6	p	1	1	1	1	1
	q	0	0	0	0	0
Sum over Locus6				1	1	1	12	1	4	1
Locus7	p	0	0	0	0	0
	q	1	1	1	1	1
Sum over Locus7				1	1	1	12	1	4	1
Locus8	p	0.591752	1	0.35017	1	0.591752
	q	0.408248	0	0.166667	0	0
Sum over Locus8				0.516837	1	0.591752	12	0.472913	4	1
Locus9	p	0	0	0	0	0
	q	1	1	1	1	1
Sum over Locus9				1	1	1	12	1	4	1
Locus10	p	0.183503	0	0.0336735	0	0
	q	0.816497	1	0.666667	1	0.816497
Sum over Locus10				0.70034	1	0.816497	12	0.673098	4	1
Locus11	p	0.0871291	0.292893	0.00759147	0.0857864	0.0255195
	q	0.912871	0.707107	0.833333	0.5	0.645497
Sum over Locus11				0.840925	0.585786	0.671017	12	0.826463	4	0.447715
Locus12	p	0.0871291	0	0.00759147	0	0
	q	0.912871	1	0.833333	1	0.912871
Sum over Locus12				0.840925	1	0.912871	12	0.826463	4	1
Locus13	p	0.42265	1	0.178633	1	0.42265
	q	0.57735	0	0.333333	0	0
Sum over Locus13				0.511966	1	0.42265	12	0.467599	4	1
Locus14	p	0.591752	0	0.35017	0	0
	q	0.408248	1	0.166667	1	0.408248
Sum over Locus14				0.516837	1	0.408248	12	0.472913	4	1
Locus15	p	0.591752	0.292893	0.35017	0.0857864	0.17332
	q	0.408248	0.707107	0.166667	0.5	0.288675
Sum over Locus15				0.516837	0.585786	0.461995	12	0.472913	4	0.447715
Locus16	p	0.42265	0	0.178633	0	0
	q	0.57735	1	0.333333	1	0.57735
Sum over Locus16				0.511966	1	0.57735	12	0.467599	4	1
Locus17	p	0.183503	1	0.0336735	1	0.183503
	q	0.816497	0	0.666667	0	0
Sum over Locus17				0.70034	1	0.183503	12	0.673098	4	1
Locus18	p	0.42265	0	0.178633	0	0
	q	0.57735	1	0.333333	1	0.57735
Sum over Locus18				0.511966	1	0.57735	12	0.467599	4	1
Locus19	p	1	1	1	1	1
	q	0	0	0	0	0
Sum over Locus19				1	1	1	12	1	4	1
Locus20	p	0	0	0	0	0
	q	1	1	1	1	1
Sum over Locus20				1	1	1	12	1	4	1
Locus21	p	0	0	0	0	0
	q	1	1	1	1	1
Sum over Locus21				1	1	1	12	1	4	1
Locus22	p	0.0871291	1	0.00759147	1	0.0871291
	q	0.912871	0	0.833333	0	0
Sum over Locus22				0.840925	1	0.0871291	12	0.826463	4	1
Locus23	p	0	0	0	0	0
	q	1	1	1	1	1
Sum over Locus23				1	1	1	12	1	4	1
Locus24	p	0.0871291	0	0.00759147	0	0
	q	0.912871	1	0.833333	1	0.912871
Sum over Locus24				0.840925	1	0.912871	12	0.826463	4	1
Locus25	p	0.292893	0.292893	0.0857864	0.0857864	0.0857864
	q	0.707107	0.707107	0.5	0.5	0.5
Sum over Locus25				0.585786	0.585786	0.585786	12	0.548131	4	0.447715
Locus26	p	0	0.292893	0	0.0857864	0
	q	1	0.707107	1	0.5	0.707107
Sum over Locus26				1	0.585786	0.707107	12	1	4	0.447715
Locus27	p	0	0	0	0	0
	q	1	1	1	1	1
Sum over Locus27				1	1	1	12	1	4	1
Locus28	p	0.0871291	0	0.00759147	0	0
	q	0.912871	1	0.833333	1	0.912871
Sum over Locus28				0.840925	1	0.912871	12	0.826463	4	1
Locus29	p	0.42265	1	0.178633	1	0.42265
	q	0.57735	0	0.333333	0	0
Sum over Locus29				0.511966	1	0.42265	12	0.467599	4	1
Locus30	p	0.0871291	0	0.00759147	0	0
	q	0.912871	1	0.833333	1	0.912871
Sum over Locus30				0.840925	1	0.912871	12	0.826463	4	1
Locus31	p	0.183503	1	0.0336735	1	0.183503
	q	0.816497	0	0.666667	0	0
Sum over Locus31				0.70034	1	0.183503	12	0.673098	4	1
Locus32	p	1	1	1	1	1
	q	0	0	0	0	0
Sum over Locus32				1	1	1	12	1	4	1
Locus33	p	0.292893	1	0.0857864	1	0.292893
	q	0.707107	0	0.5	0	0
Sum over Locus33				0.585786	1	0.292893	12	0.548131	4	1
Locus34	p	0.292893	0.292893	0.0857864	0.0857864	0.0857864
	q	0.707107	0.707107	0.5	0.5	0.5
Sum over Locus34				0.585786	0.585786	0.585786	12	0.548131	4	0.447715
Locus35	p	0	0	0	0	0
	q	1	1	1	1	1
Sum over Locus35				1	1	1	12	1	4	1
Locus36	p	0.292893	1	0.0857864	1	0.292893
	q	0.707107	0	0.5	0	0
Sum over Locus36				0.585786	1	0.292893	12	0.548131	4	1
Locus37	p	0.183503	0	0.0336735	0	0
	q	0.816497	1	0.666667	1	0.816497
Sum over Locus37				0.70034	1	0.816497	12	0.673098	4	1
Locus38	p	0.0871291	0	0.00759147	0	0
	q	0.912871	1	0.833333	1	0.912871
Sum over Locus38				0.840925	1	0.912871	12	0.826463	4	1
Locus39	p	1	1	1	1	1
	q	0	0	0	0	0
Sum over Locus39				1	1	1	12	1	4	1
Locus40	p	0.292893	0.292893	0.0857864	0.0857864	0.0857864
	q	0.707107	0.707107	0.5	0.5	0.5
Sum over Locus40				0.585786	0.585786	0.585786	12	0.548131	4	0.447715
Locus41	p	0	0	0	0	0
	q	1	1	1	1	1
Sum over Locus41				1	1	1	12	1	4	1
Locus42	p	1	1	1	1	1
	q	0	0	0	0	0
Sum over Locus42				1	1	1	12	1	4	1
Locus43	p	0.292893	0.292893	0.0857864	0.0857864	0.0857864
	q	0.707107	0.707107	0.5	0.5	0.5
Sum over Locus43				0.585786	0.585786	0.585786	12	0.548131	4	0.447715
Locus44	p	0.591752	1	0.35017	1	0.591752
	q	0.408248	0	0.166667	0	0
Sum over Locus44				0.516837	1	0.591752	12	0.472913	4	1
Locus45	p	0.292893	0.292893	0.0857864	0.0857864	0.0857864
	q	0.707107	0.707107	0.5	0.5	0.5
Sum over Locus45				0.585786	0.585786	0.585786	12	0.548131	4	0.447715
Locus46	p	0.42265	1	0.178633	1	0.42265
	q	0.57735	0	0.333333	0	0
Sum over Locus46				0.511966	1	0.42265	12	0.467599	4	1
Locus47	p	0	0	0	0	0
	q	1	1	1	1	1
Sum over Locus47				1	1	1	12	1	4	1
Locus48	p	1	1	1	1	1
	q	0	0	0	0	0
Sum over Locus48				1	1	1	12	1	4	1
Locus49	p	0	0	0	0	0
	q	1	1	1	1	1
Sum over Locus49				1	1	1	12	1	4	1
Locus50	p	0.591752	1	0.35017	1	0.591752
	q	0.408248	0	0.166667	0	0
Sum over Locus50				0.516837	1	0.591752	12	0.472913	4	1
Locus51	p	0.0871291	0	0.00759147	0	0
	q	0.912871	1	0.833333	1	0.912871
Sum over Locus51				0.840925	1	0.912871	12	0.826463	4	1
Locus52	p	0	0	0	0	0
	q	1	1	1	1	1
Sum over Locus52				1	1	1	12	1	4	1
Locus53	p	0.0871291	0	0.00759147	0	0
	q	0.912871	1	0.833333	1	0.912871
Sum over Locus53				0.840925	1	0.912871	12	0.826463	4	1
Locus54	p	0	0	0	0	0
	q	1	1	1	1	1
Sum over Locus54				1	1	1	12	1	4	1
Locus55	p	1	1	1	1	1
	q	0	0	0	0	0
Sum over Locus55				1	1	1	12	1	4	1
Locus56	p	1	1	1	1	1
	q	0	0	0	0	0
Sum over Locus56				1	1	1	12	1	4	1
Locus57	p	0.591752	1	0.35017	1	0.591752
	q	0.408248	0	0.166667	0	0
Sum over Locus57				0.516837	1	0.591752	12	0.472913	4	1
Locus58	p	1	1	1	1	1
	q	0	0	0	0	0
Sum over Locus58				1	1	1	12	1	4	1
Locus59	p	0.591752	1	0.35017	1	0.591752
	q	0.408248	0	0.166667	0	0
Sum over Locus59				0.516837	1	0.591752	12	0.472913	4	1
Locus60	p	0.183503	0.292893	0.0336735	0.0857864	0.0537469
	q	0.816497	0.707107	0.666667	0.5	0.57735
Sum over Locus60				0.70034	0.585786	0.631097	12	0.673098	4	0.447715
Locus61	p	0	0.292893	0	0.0857864	0
	q	1	0.707107	1	0.5	0.707107
Sum over Locus61				1	0.585786	0.707107	12	1	4	0.447715
Locus62	p	1	1	1	1	1
	q	0	0	0	0	0
Sum over Locus62				1	1	1	12	1	4	1
Locus63	p	0	0	0	0	0
	q	1	1	1	1	1
Sum over Locus63				1	1	1	12	1	4	1
Locus64	p	0	0	0	0	0
	q	1	1	1	1	1
Sum over Locus64				1	1	1	12	1	4	1
Locus65	p	0	0	0	0	0
	q	1	1	1	1	1
Sum over Locus65				1	1	1	12	1	4	1
Locus66	p	1	1	1	1	1
	q	0	0	0	0	0
Sum over Locus66				1	1	1	12	1	4	1
Locus67	p	0	0	0	0	0
	q	1	1	1	1	1
Sum over Locus67				1	1	1	12	1	4	1
Locus68	p	0.591752	1	0.35017	1	0.591752
	q	0.408248	0	0.166667	0	0
Sum over Locus68				0.516837	1	0.591752	12	0.472913	4	1
Locus69	p	0	0	0	0	0
	q	1	1	1	1	1
Sum over Locus69				1	1	1	12	1	4	1
Locus70	p	1	1	1	1	1
	q	0	0	0	0	0
Sum over Locus70				1	1	1	12	1	4	1
Locus71	p	0	0	0	0	0
	q	1	1	1	1	1
Sum over Locus71				1	1	1	12	1	4	1
Locus72	p	1	1	1	1	1
	q	0	0	0	0	0
Sum over Locus72				1	1	1	12	1	4	1
Locus73	p	1	1	1	1	1
	q	0	0	0	0	0
Sum over Locus73				1	1	1	12	1	4	1
Locus74	p	0	0	0	0	0
	q	1	1	1	1	1
Sum over Locus74				1	1	1	12	1	4	1
Locus75	p	0	0	0	0	0
	q	1	1	1	1	1
Sum over Locus75				1	1	1	12	1	4	1
Locus76	p	0	0	0	0	0
	q	1	1	1	1	1
Sum over Locus76				1	1	1	12	1	4	1
Locus77	p	0	0	0	0	0
	q	1	1	1	1	1
Sum over Locus77				1	1	1	12	1	4	1
Locus78	p	0	0	0	0	0
	q	1	1	1	1	1
Sum over Locus78				1	1	1	12	1	4	1
Locus79	p	1	1	1	1	1
	q	0	0	0	0	0
Sum over Locus79				1	1	1	12	1	4	1
Locus80	p	0	0	0	0	0
	q	1	1	1	1	1
Sum over Locus80				1	1	1	12	1	4	1
Locus81	p	0.42265	0.292893	0.178633	0.0857864	0.123791
	q	0.57735	0.707107	0.333333	0.5	0.408248
Sum over Locus81				0.511966	0.585786	0.53204	12	0.467599	4	0.447715
Locus82	p	0.591752	1	0.35017	1	0.591752
	q	0.408248	0	0.166667	0	0
Sum over Locus82				0.516837	1	0.591752	12	0.472913	4	1
Locus83	p	0.292893	0.292893	0.0857864	0.0857864	0.0857864
	q	0.707107	0.707107	0.5	0.5	0.5
Sum over Locus83				0.585786	0.585786	0.585786	12	0.548131	4	0.447715
Locus84	p	0.0871291	0	0.00759147	0	0
	q	0.912871	1	0.833333	1	0.912871
Sum over Locus84				0.840925	1	0.912871	12	0.826463	4	1
Locus85	p	0.183503	1	0.0336735	1	0.183503
	q	0.816497	0	0.666667	0	0
Sum over Locus85				0.70034	1	0.183503	12	0.673098	4	1
Locus86	p	0	0	0	0	0
	q	1	1	1	1	1
Sum over Locus86				1	1	1	12	1	4	1
Locus87	p	0.183503	0.292893	0.0336735	0.0857864	0.0537469
	q	0.816497	0.707107	0.666667	0.5	0.57735
Sum over Locus87				0.70034	0.585786	0.631097	12	0.673098	4	0.447715
Locus88	p	0.0871291	0	0.00759147	0	0
	q	0.912871	1	0.833333	1	0.912871
Sum over Locus88				0.840925	1	0.912871	12	0.826463	4	1
Locus89	p	0.591752	1	0.35017	1	0.591752
	q	0.408248	0	0.166667	0	0
Sum over Locus89				0.516837	1	0.591752	12	0.472913	4	1
Locus90	p	0	0	0	0	0
	q	1	1	1	1	1
Sum over Locus90				1	1	1	12	1	4	1
Locus91	p	1	1	1	1	1
	q	0	0	0	0	0
Sum over Locus91				1	1	1	12	1	4	1
Locus92	p	0.591752	1	0.35017	1	0.591752
	q	0.408248	0	0.166667	0	0
Sum over Locus92				0.516837	1	0.591752	12	0.472913	4	1
Locus93	p	0	0	0	0	0
	q	1	1	1	1	1
Sum over Locus93				1	1	1	12	1	4	1
Locus94	p	0	0	0	0	0
	q	1	1	1	1	1
Sum over Locus94				1	1	1	12	1	4	1
Locus95	p	0.591752	1	0.35017	1	0.591752
	q	0.408248	0	0.166667	0	0
Sum over Locus95				0.516837	1	0.591752	12	0.472913	4	1
Locus96	p	0	0	0	0	0
	q	1	1	1	1	1
Sum over Locus96				1	1	1	12	1	4	1
Locus97	p	0	0	0	0	0
	q	1	1	1	1	1
Sum over Locus97				1	1	1	12	1	4	1
Locus98	p	0.42265	1	0.178633	1	0.42265
	q	0.57735	0	0.333333	0	0
Sum over Locus98				0.511966	1	0.42265	12	0.467599	4	1
Locus99	p	0.0871291	0.292893	0.00759147	0.0857864	0.0255195
	q	0.912871	0.707107	0.833333	0.5	0.645497
Sum over Locus99				0.840925	0.585786	0.671017	12	0.826463	4	0.447715
Locus100	p	0.183503	0	0.0336735	0	0
	q	0.816497	1	0.666667	1	0.816497
Sum over Locus100				0.70034	1	0.816497	12	0.673098	4	1
Locus101	p	0	0.292893	0	0.0857864	0
	q	1	0.707107	1	0.5	0.707107
Sum over Locus101				1	0.585786	0.707107	12	1	4	0.447715
Locus102	p	0	0	0	0	0
	q	1	1	1	1	1
Sum over Locus102				1	1	1	12	1	4	1
Locus103	p	0	0	0	0	0
	q	1	1	1	1	1
Sum over Locus103				1	1	1	12	1	4	1
Locus104	p	0.0871291	0	0.00759147	0	0
	q	0.912871	1	0.833333	1	0.912871
Sum over Locus104				0.840925	1	0.912871	12	0.826463	4	1
Locus105	p	0	0	0	0	0
	q	1	1	1	1	1
Sum over Locus105				1	1	1	12	1	4	1
Locus106	p	0	0	0	0	0
	q	1	1	1	1	1
Sum over Locus106				1	1	1	12	1	4	1
Locus107	p	0	0.292893	0	0.0857864	0
	q	1	0.707107	1	0.5	0.707107
Sum over Locus107				1	0.585786	0.707107	12	1	4	0.447715
Locus108	p	0	0	0	0	0
	q	1	1	1	1	1
Sum over Locus108				1	1	1	12	1	4	1
Locus109	p	0.591752	1	0.35017	1	0.591752
	q	0.408248	0	0.166667	0	0
Sum over Locus109				0.516837	1	0.591752	12	0.472913	4	1
Locus110	p	0.0871291	0	0.00759147	0	0
	q	0.912871	1	0.833333	1	0.912871
Sum over Locus110				0.840925	1	0.912871	12	0.826463	4	1
Locus111	p	0	0	0	0	0
	q	1	1	1	1	1
Sum over Locus111				1	1	1	12	1	4	1
Locus112	p	0	0	0	0	0
	q	1	1	1	1	1
Sum over Locus112				1	1	1	12	1	4	1
Locus113	p	0	0	0	0	0
	q	1	1	1	1	1
Sum over Locus113				1	1	1	12	1	4	1
Locus114	p	0	0	0	0	0
	q	1	1	1	1	1
Sum over Locus114				1	1	1	12	1	4	1
Locus115	p	0.0871291	0	0.00759147	0	0
	q	0.912871	1	0.833333	1	0.912871
Sum over Locus115				0.840925	1	0.912871	12	0.826463	4	1
Locus116	p	1	1	1	1	1
	q	0	0	0	0	0
Sum over Locus116				1	1	1	12	1	4	1
Locus117	p	0	0	0	0	0
	q	1	1	1	1	1
Sum over Locus117				1	1	1	12	1	4	1
Locus118	p	0	0	0	0	0
	q	1	1	1	1	1
Sum over Locus118				1	1	1	12	1	4	1
Locus119	p	0	0	0	0	0
	q	1	1	1	1	1
Sum over Locus119				1	1	1	12	1	4	1
Locus120	p	0	0	0	0	0
	q	1	1	1	1	1
Sum over Locus120				1	1	1	12	1	4	1
Locus121	p	0	0	0	0	0
	q	1	1	1	1	1
Sum over Locus121				1	1	1	12	1	4	1
Locus122	p	1	1	1	1	1
	q	0	0	0	0	0
Sum over Locus122				1	1	1	12	1	4	1
Locus123	p	0	0.292893	0	0.0857864	0
	q	1	0.707107	1	0.5	0.707107
Sum over Locus123				1	0.585786	0.707107	12	1	4	0.447715
Locus124	p	0.42265	1	0.178633	1	0.42265
	q	0.57735	0	0.333333	0	0
Sum over Locus124				0.511966	1	0.42265	12	0.467599	4	1
Locus125	p	1	1	1	1	1
	q	0	0	0	0	0
Sum over Locus125				1	1	1	12	1	4	1
Locus126	p	1	0.292893	1	0.0857864	0.292893
	q	0	0.707107	0	0.5	0
Sum over Locus126				1	0.585786	0.292893	12	1	4	0.447715
Locus127	p	0	0	0	0	0
	q	1	1	1	1	1
Sum over Locus127				1	1	1	12	1	4	1
Locus128	p	0.42265	0.292893	0.178633	0.0857864	0.123791
	q	0.57735	0.707107	0.333333	0.5	0.408248
Sum over Locus128				0.511966	0.585786	0.53204	12	0.467599	4	0.447715
Locus129	p	1	1	1	1	1
	q	0	0	0	0	0
Sum over Locus129				1	1	1	12	1	4	1
Locus130	p	0.292893	0	0.0857864	0	0
	q	0.707107	1	0.5	1	0.707107
Sum over Locus130				0.585786	1	0.707107	12	0.548131	4	1
Locus131	p	0.591752	1	0.35017	1	0.591752
	q	0.408248	0	0.166667	0	0
Sum over Locus131				0.516837	1	0.591752	12	0.472913	4	1
Locus132	p	1	1	1	1	1
	q	0	0	0	0	0
Sum over Locus132				1	1	1	12	1	4	1
Locus133	p	0.183503	0	0.0336735	0	0
	q	0.816497	1	0.666667	1	0.816497
Sum over Locus133				0.70034	1	0.816497	12	0.673098	4	1
Locus134	p	0.0871291	0.292893	0.00759147	0.0857864	0.0255195
	q	0.912871	0.707107	0.833333	0.5	0.645497
Sum over Locus134				0.840925	0.585786	0.671017	12	0.826463	4	0.447715
Locus135	p	0	0	0	0	0
	q	1	1	1	1	1
Sum over Locus135				1	1	1	12	1	4	1
Locus136	p	0	0	0	0	0
	q	1	1	1	1	1
Sum over Locus136				1	1	1	12	1	4	1
Locus137	p	0.42265	0	0.178633	0	0
	q	0.57735	1	0.333333	1	0.57735
Sum over Locus137				0.511966	1	0.57735	12	0.467599	4	1
Locus138	p	1	1	1	1	1
	q	0	0	0	0	0
Sum over Locus138				1	1	1	12	1	4	1
Locus139	p	0.591752	1	0.35017	1	0.591752
	q	0.408248	0	0.166667	0	0
Sum over Locus139				0.516837	1	0.591752	12	0.472913	4	1
Locus140	p	0.591752	1	0.35017	1	0.591752
	q	0.408248	0	0.166667	0	0
Sum over Locus140				0.516837	1	0.591752	12	0.472913	4	1
Locus141	p	1	1	1	1	1
	q	0	0	0	0	0
Sum over Locus141				1	1	1	12	1	4	1
Locus142	p	0	0	0	0	0
	q	1	1	1	1	1
Sum over Locus142				1	1	1	12	1	4	1
Locus143	p	0	0	0	0	0
	q	1	1	1	1	1
Sum over Locus143				1	1	1	12	1	4	1
Locus144	p	0.42265	0	0.178633	0	0
	q	0.57735	1	0.333333	1	0.57735
Sum over Locus144				0.511966	1	0.57735	12	0.467599	4	1
Locus145	p	0.183503	0	0.0336735	0	0
	q	0.816497	1	0.666667	1	0.816497
Sum over Locus145				0.70034	1	0.816497	12	0.673098	4	1
Locus146	p	0	0	0	0	0
	q	1	1	1	1	1
Sum over Locus146				1	1	1	12	1	4	1
Locus147	p	0.0871291	0	0.00759147	0	0
	q	0.912871	1	0.833333	1	0.912871
Sum over Locus147				0.840925	1	0.912871	12	0.826463	4	1
Locus148	p	1	1	1	1	1
	q	0	0	0	0	0
Sum over Locus148				1	1	1	12	1	4	1
Locus149	p	1	1	1	1	1
	q	0	0	0	0	0
Sum over Locus149				1	1	1	12	1	4	1
Locus150	p	0.183503	0.292893	0.0336735	0.0857864	0.0537469
	q	0.816497	0.707107	0.666667	0.5	0.57735
Sum over Locus150				0.70034	0.585786	0.631097	12	0.673098	4	0.447715
Locus151	p	0.0871291	0	0.00759147	0	0
	q	0.912871	1	0.833333	1	0.912871
Sum over Locus151				0.840925	1	0.912871	12	0.826463	4	1
Locus152	p	1	1	1	1	1
	q	0	0	0	0	0
Sum over Locus152				1	1	1	12	1	4	1
Locus153	p	0	0.292893	0	0.0857864	0
	q	1	0.707107	1	0.5	0.707107
Sum over Locus153				1	0.585786	0.707107	12	1	4	0.447715
Locus154	p	0.0871291	0.292893	0.00759147	0.0857864	0.0255195
	q	0.912871	0.707107	0.833333	0.5	0.645497
Sum over Locus154				0.840925	0.585786	0.671017	12	0.826463	4	0.447715
Locus155	p	0	0	0	0	0
	q	1	1	1	1	1
Sum over Locus155				1	1	1	12	1	4	1
Locus156	p	0.0871291	0.292893	0.00759147	0.0857864	0.0255195
	q	0.912871	0.707107	0.833333	0.5	0.645497
Sum over Locus156				0.840925	0.585786	0.671017	12	0.826463	4	0.447715
Locus157	p	0.0871291	0	0.00759147	0	0
	q	0.912871	1	0.833333	1	0.912871
Sum over Locus157				0.840925	1	0.912871	12	0.826463	4	1
Locus158	p	0	0.292893	0	0.0857864	0
	q	1	0.707107	1	0.5	0.707107
Sum over Locus158				1	0.585786	0.707107	12	1	4	0.447715
Locus159	p	0	0	0	0	0
	q	1	1	1	1	1
Sum over Locus159				1	1	1	12	1	4	1
Locus160	p	0.292893	0	0.0857864	0	0
	q	0.707107	1	0.5	1	0.707107
Sum over Locus160				0.585786	1	0.707107	12	0.548131	4	1
Locus161	p	0	0	0	0	0
	q	1	1	1	1	1
Sum over Locus161				1	1	1	12	1	4	1
Locus162	p	0	0	0	0	0
	q	1	1	1	1	1
Sum over Locus162				1	1	1	12	1	4	1
Locus163	p	0	0	0	0	0
	q	1	1	1	1	1
Sum over Locus163				1	1	1	12	1	4	1
Locus164	p	1	1	1	1	1
	q	0	0	0	0	0
Sum over Locus164				1	1	1	12	1	4	1
Locus165	p	0	0	0	0	0
	q	1	1	1	1	1
Sum over Locus165				1	1	1	12	1	4	1
				Jx	Jy	JxJy		JxUb		JyUb
Sum over Loci				139.506	153.816	135.288		137.188		150.088
	JxJy	(Jx*Jy)^0.5)		JxJy / ((Jx *Jy)^0.5)			(JxUb*JyUb)^0.5)		JxJy / ((JxUb* JyUb)^0.5)
	135.288	146.486		0.923551			143.493		0.942814
Nei Genetic Identity	0.923551
Nei Unbiased Genetic Identity	0.942814
Nei Genetic Distance	0.0795297
Nei Unbiased Genetic Distance	0.0588859
Pairwise Pops: 1000-2000 m versus above 2000 m
		1000-2000 m	above 2000 m
Locus	Allele	x	y	x^2	y^2	xy	2Nx	xUb	2Ny	yUb
Locus1	p	0.292893	1	0.0857864	1	0.292893
	q	0.707107	0	0.5	0	0
Sum over Locus1				0.585786	1	0.292893	8	0.526613	4	1
Locus2	p	0.292893	0	0.0857864	0	0
	q	0.707107	1	0.5	1	0.707107
Sum over Locus2				0.585786	1	0.707107	8	0.526613	4	1
Locus3	p	0.292893	0.292893	0.0857864	0.0857864	0.0857864
	q	0.707107	0.707107	0.5	0.5	0.5
Sum over Locus3				0.585786	0.585786	0.585786	8	0.526613	4	0.447715
Locus4	p	0.292893	0.292893	0.0857864	0.0857864	0.0857864
	q	0.707107	0.707107	0.5	0.5	0.5
Sum over Locus4				0.585786	0.585786	0.585786	8	0.526613	4	0.447715
Locus5	p	1	1	1	1	1
	q	0	0	0	0	0
Sum over Locus5				1	1	1	8	1	4	1
Locus6	p	1	1	1	1	1
	q	0	0	0	0	0
Sum over Locus6				1	1	1	8	1	4	1
Locus7	p	0.292893	0	0.0857864	0	0
	q	0.707107	1	0.5	1	0.707107
Sum over Locus7				0.585786	1	0.707107	8	0.526613	4	1
Locus8	p	1	1	1	1	1
	q	0	0	0	0	0
Sum over Locus8				1	1	1	8	1	4	1
Locus9	p	0	0	0	0	0
	q	1	1	1	1	1
Sum over Locus9				1	1	1	8	1	4	1
Locus10	p	0	0	0	0	0
	q	1	1	1	1	1
Sum over Locus10				1	1	1	8	1	4	1
Locus11	p	0	0.292893	0	0.0857864	0
	q	1	0.707107	1	0.5	0.707107
Sum over Locus11				1	0.585786	0.707107	8	1	4	0.447715
Locus12	p	0	0	0	0	0
	q	1	1	1	1	1
Sum over Locus12				1	1	1	8	1	4	1
Locus13	p	1	1	1	1	1
	q	0	0	0	0	0
Sum over Locus13				1	1	1	8	1	4	1
Locus14	p	0.5	0	0.25	0	0
	q	0.5	1	0.25	1	0.5
Sum over Locus14				0.5	1	0.5	8	0.428571	4	1
Locus15	p	0.5	0.292893	0.25	0.0857864	0.146447
	q	0.5	0.707107	0.25	0.5	0.353553
Sum over Locus15				0.5	0.585786	0.5	8	0.428571	4	0.447715
Locus16	p	0.133975	0	0.0179492	0	0
	q	0.866025	1	0.75	1	0.866025
Sum over Locus16				0.767949	1	0.866025	8	0.734799	4	1
Locus17	p	0.292893	1	0.0857864	1	0.292893
	q	0.707107	0	0.5	0	0
Sum over Locus17				0.585786	1	0.292893	8	0.526613	4	1
Locus18	p	0.292893	0	0.0857864	0	0
	q	0.707107	1	0.5	1	0.707107
Sum over Locus18				0.585786	1	0.707107	8	0.526613	4	1
Locus19	p	1	1	1	1	1
	q	0	0	0	0	0
Sum over Locus19				1	1	1	8	1	4	1
Locus20	p	0.5	0	0.25	0	0
	q	0.5	1	0.25	1	0.5
Sum over Locus20				0.5	1	0.5	8	0.428571	4	1
Locus21	p	0	0	0	0	0
	q	1	1	1	1	1
Sum over Locus21				1	1	1	8	1	4	1
Locus22	p	0.5	1	0.25	1	0.5
	q	0.5	0	0.25	0	0
Sum over Locus22				0.5	1	0.5	8	0.428571	4	1
Locus23	p	0.292893	0	0.0857864	0	0
	q	0.707107	1	0.5	1	0.707107
Sum over Locus23				0.585786	1	0.707107	8	0.526613	4	1
Locus24	p	0	0	0	0	0
	q	1	1	1	1	1
Sum over Locus24				1	1	1	8	1	4	1
Locus25	p	0.133975	0.292893	0.0179492	0.0857864	0.0392403
	q	0.866025	0.707107	0.75	0.5	0.612372
Sum over Locus25				0.767949	0.585786	0.651613	8	0.734799	4	0.447715
Locus26	p	0.292893	0.292893	0.0857864	0.0857864	0.0857864
	q	0.707107	0.707107	0.5	0.5	0.5
Sum over Locus26				0.585786	0.585786	0.585786	8	0.526613	4	0.447715
Locus27	p	0	0	0	0	0
	q	1	1	1	1	1
Sum over Locus27				1	1	1	8	1	4	1
Locus28	p	0	0	0	0	0
	q	1	1	1	1	1
Sum over Locus28				1	1	1	8	1	4	1
Locus29	p	0.292893	1	0.0857864	1	0.292893
	q	0.707107	0	0.5	0	0
Sum over Locus29				0.585786	1	0.292893	8	0.526613	4	1
Locus30	p	0.133975	0	0.0179492	0	0
	q	0.866025	1	0.75	1	0.866025
Sum over Locus30				0.767949	1	0.866025	8	0.734799	4	1
Locus31	p	0.292893	1	0.0857864	1	0.292893
	q	0.707107	0	0.5	0	0
Sum over Locus31				0.585786	1	0.292893	8	0.526613	4	1
Locus32	p	1	1	1	1	1
	q	0	0	0	0	0
Sum over Locus32				1	1	1	8	1	4	1
Locus33	p	0.133975	1	0.0179492	1	0.133975
	q	0.866025	0	0.75	0	0
Sum over Locus33				0.767949	1	0.133975	8	0.734799	4	1
Locus34	p	0.133975	0.292893	0.0179492	0.0857864	0.0392403
	q	0.866025	0.707107	0.75	0.5	0.612372
Sum over Locus34				0.767949	0.585786	0.651613	8	0.734799	4	0.447715
Locus35	p	0.5	0	0.25	0	0
	q	0.5	1	0.25	1	0.5
Sum over Locus35				0.5	1	0.5	8	0.428571	4	1
Locus36	p	0.133975	1	0.0179492	1	0.133975
	q	0.866025	0	0.75	0	0
Sum over Locus36				0.767949	1	0.133975	8	0.734799	4	1
Locus37	p	0.133975	0	0.0179492	0	0
	q	0.866025	1	0.75	1	0.866025
Sum over Locus37				0.767949	1	0.866025	8	0.734799	4	1
Locus38	p	0.5	0	0.25	0	0
	q	0.5	1	0.25	1	0.5
Sum over Locus38				0.5	1	0.5	8	0.428571	4	1
Locus39	p	1	1	1	1	1
	q	0	0	0	0	0
Sum over Locus39				1	1	1	8	1	4	1
Locus40	p	0.292893	0.292893	0.0857864	0.0857864	0.0857864
	q	0.707107	0.707107	0.5	0.5	0.5
Sum over Locus40				0.585786	0.585786	0.585786	8	0.526613	4	0.447715
Locus41	p	0	0	0	0	0
	q	1	1	1	1	1
Sum over Locus41				1	1	1	8	1	4	1
Locus42	p	1	1	1	1	1
	q	0	0	0	0	0
Sum over Locus42				1	1	1	8	1	4	1
Locus43	p	0.5	0.292893	0.25	0.0857864	0.146447
	q	0.5	0.707107	0.25	0.5	0.353553
Sum over Locus43				0.5	0.585786	0.5	8	0.428571	4	0.447715
Locus44	p	0.5	1	0.25	1	0.5
	q	0.5	0	0.25	0	0
Sum over Locus44				0.5	1	0.5	8	0.428571	4	1
Locus45	p	0.292893	0.292893	0.0857864	0.0857864	0.0857864
	q	0.707107	0.707107	0.5	0.5	0.5
Sum over Locus45				0.585786	0.585786	0.585786	8	0.526613	4	0.447715
Locus46	p	0.133975	1	0.0179492	1	0.133975
	q	0.866025	0	0.75	0	0
Sum over Locus46				0.767949	1	0.133975	8	0.734799	4	1
Locus47	p	0.133975	0	0.0179492	0	0
	q	0.866025	1	0.75	1	0.866025
Sum over Locus47				0.767949	1	0.866025	8	0.734799	4	1
Locus48	p	1	1	1	1	1
	q	0	0	0	0	0
Sum over Locus48				1	1	1	8	1	4	1
Locus49	p	0.5	0	0.25	0	0
	q	0.5	1	0.25	1	0.5
Sum over Locus49				0.5	1	0.5	8	0.428571	4	1
Locus50	p	0.133975	1	0.0179492	1	0.133975
	q	0.866025	0	0.75	0	0
Sum over Locus50				0.767949	1	0.133975	8	0.734799	4	1
Locus51	p	0	0	0	0	0
	q	1	1	1	1	1
Sum over Locus51				1	1	1	8	1	4	1
Locus52	p	0	0	0	0	0
	q	1	1	1	1	1
Sum over Locus52				1	1	1	8	1	4	1
Locus53	p	0	0	0	0	0
	q	1	1	1	1	1
Sum over Locus53				1	1	1	8	1	4	1
Locus54	p	0.133975	0	0.0179492	0	0
	q	0.866025	1	0.75	1	0.866025
Sum over Locus54				0.767949	1	0.866025	8	0.734799	4	1
Locus55	p	1	1	1	1	1
	q	0	0	0	0	0
Sum over Locus55				1	1	1	8	1	4	1
Locus56	p	1	1	1	1	1
	q	0	0	0	0	0
Sum over Locus56				1	1	1	8	1	4	1
Locus57	p	0.133975	1	0.0179492	1	0.133975
	q	0.866025	0	0.75	0	0
Sum over Locus57				0.767949	1	0.133975	8	0.734799	4	1
Locus58	p	1	1	1	1	1
	q	0	0	0	0	0
Sum over Locus58				1	1	1	8	1	4	1
Locus59	p	0.5	1	0.25	1	0.5
	q	0.5	0	0.25	0	0
Sum over Locus59				0.5	1	0.5	8	0.428571	4	1
Locus60	p	0.292893	0.292893	0.0857864	0.0857864	0.0857864
	q	0.707107	0.707107	0.5	0.5	0.5
Sum over Locus60				0.585786	0.585786	0.585786	8	0.526613	4	0.447715
Locus61	p	0	0.292893	0	0.0857864	0
	q	1	0.707107	1	0.5	0.707107
Sum over Locus61				1	0.585786	0.707107	8	1	4	0.447715
Locus62	p	1	1	1	1	1
	q	0	0	0	0	0
Sum over Locus62				1	1	1	8	1	4	1
Locus63	p	0.133975	0	0.0179492	0	0
	q	0.866025	1	0.75	1	0.866025
Sum over Locus63				0.767949	1	0.866025	8	0.734799	4	1
Locus64	p	0	0	0	0	0
	q	1	1	1	1	1
Sum over Locus64				1	1	1	8	1	4	1
Locus65	p	0.292893	0	0.0857864	0	0
	q	0.707107	1	0.5	1	0.707107
Sum over Locus65				0.585786	1	0.707107	8	0.526613	4	1
Locus66	p	1	1	1	1	1
	q	0	0	0	0	0
Sum over Locus66				1	1	1	8	1	4	1
Locus67	p	0.133975	0	0.0179492	0	0
	q	0.866025	1	0.75	1	0.866025
Sum over Locus67				0.767949	1	0.866025	8	0.734799	4	1
Locus68	p	0.5	1	0.25	1	0.5
	q	0.5	0	0.25	0	0
Sum over Locus68				0.5	1	0.5	8	0.428571	4	1
Locus69	p	0.133975	0	0.0179492	0	0
	q	0.866025	1	0.75	1	0.866025
Sum over Locus69				0.767949	1	0.866025	8	0.734799	4	1
Locus70	p	0.5	1	0.25	1	0.5
	q	0.5	0	0.25	0	0
Sum over Locus70				0.5	1	0.5	8	0.428571	4	1
Locus71	p	0	0	0	0	0
	q	1	1	1	1	1
Sum over Locus71				1	1	1	8	1	4	1
Locus72	p	0.5	1	0.25	1	0.5
	q	0.5	0	0.25	0	0
Sum over Locus72				0.5	1	0.5	8	0.428571	4	1
Locus73	p	0.5	1	0.25	1	0.5
	q	0.5	0	0.25	0	0
Sum over Locus73				0.5	1	0.5	8	0.428571	4	1
Locus74	p	0.292893	0	0.0857864	0	0
	q	0.707107	1	0.5	1	0.707107
Sum over Locus74				0.585786	1	0.707107	8	0.526613	4	1
Locus75	p	0.133975	0	0.0179492	0	0
	q	0.866025	1	0.75	1	0.866025
Sum over Locus75				0.767949	1	0.866025	8	0.734799	4	1
Locus76	p	0	0	0	0	0
	q	1	1	1	1	1
Sum over Locus76				1	1	1	8	1	4	1
Locus77	p	0	0	0	0	0
	q	1	1	1	1	1
Sum over Locus77				1	1	1	8	1	4	1
Locus78	p	0.133975	0	0.0179492	0	0
	q	0.866025	1	0.75	1	0.866025
Sum over Locus78				0.767949	1	0.866025	8	0.734799	4	1
Locus79	p	0.5	1	0.25	1	0.5
	q	0.5	0	0.25	0	0
Sum over Locus79				0.5	1	0.5	8	0.428571	4	1
Locus80	p	0	0	0	0	0
	q	1	1	1	1	1
Sum over Locus80				1	1	1	8	1	4	1
Locus81	p	0.5	0.292893	0.25	0.0857864	0.146447
	q	0.5	0.707107	0.25	0.5	0.353553
Sum over Locus81				0.5	0.585786	0.5	8	0.428571	4	0.447715
Locus82	p	0.5	1	0.25	1	0.5
	q	0.5	0	0.25	0	0
Sum over Locus82				0.5	1	0.5	8	0.428571	4	1
Locus83	p	0.292893	0.292893	0.0857864	0.0857864	0.0857864
	q	0.707107	0.707107	0.5	0.5	0.5
Sum over Locus83				0.585786	0.585786	0.585786	8	0.526613	4	0.447715
Locus84	p	0.292893	0	0.0857864	0	0
	q	0.707107	1	0.5	1	0.707107
Sum over Locus84				0.585786	1	0.707107	8	0.526613	4	1
Locus85	p	0.133975	1	0.0179492	1	0.133975
	q	0.866025	0	0.75	0	0
Sum over Locus85				0.767949	1	0.133975	8	0.734799	4	1
Locus86	p	0	0	0	0	0
	q	1	1	1	1	1
Sum over Locus86				1	1	1	8	1	4	1
Locus87	p	0	0.292893	0	0.0857864	0
	q	1	0.707107	1	0.5	0.707107
Sum over Locus87				1	0.585786	0.707107	8	1	4	0.447715
Locus88	p	0.133975	0	0.0179492	0	0
	q	0.866025	1	0.75	1	0.866025
Sum over Locus88				0.767949	1	0.866025	8	0.734799	4	1
Locus89	p	0.5	1	0.25	1	0.5
	q	0.5	0	0.25	0	0
Sum over Locus89				0.5	1	0.5	8	0.428571	4	1
Locus90	p	0.292893	0	0.0857864	0	0
	q	0.707107	1	0.5	1	0.707107
Sum over Locus90				0.585786	1	0.707107	8	0.526613	4	1
Locus91	p	1	1	1	1	1
	q	0	0	0	0	0
Sum over Locus91				1	1	1	8	1	4	1
Locus92	p	0.292893	1	0.0857864	1	0.292893
	q	0.707107	0	0.5	0	0
Sum over Locus92				0.585786	1	0.292893	8	0.526613	4	1
Locus93	p	0.292893	0	0.0857864	0	0
	q	0.707107	1	0.5	1	0.707107
Sum over Locus93				0.585786	1	0.707107	8	0.526613	4	1
Locus94	p	0.133975	0	0.0179492	0	0
	q	0.866025	1	0.75	1	0.866025
Sum over Locus94				0.767949	1	0.866025	8	0.734799	4	1
Locus95	p	0.292893	1	0.0857864	1	0.292893
	q	0.707107	0	0.5	0	0
Sum over Locus95				0.585786	1	0.292893	8	0.526613	4	1
Locus96	p	0.133975	0	0.0179492	0	0
	q	0.866025	1	0.75	1	0.866025
Sum over Locus96				0.767949	1	0.866025	8	0.734799	4	1
Locus97	p	0.133975	0	0.0179492	0	0
	q	0.866025	1	0.75	1	0.866025
Sum over Locus97				0.767949	1	0.866025	8	0.734799	4	1
Locus98	p	0	1	0	1	0
	q	1	0	1	0	0
Sum over Locus98				1	1	0	8	1	4	1
Locus99	p	0	0.292893	0	0.0857864	0
	q	1	0.707107	1	0.5	0.707107
Sum over Locus99				1	0.585786	0.707107	8	1	4	0.447715
Locus100	p	0.133975	0	0.0179492	0	0
	q	0.866025	1	0.75	1	0.866025
Sum over Locus100				0.767949	1	0.866025	8	0.734799	4	1
Locus101	p	0.292893	0.292893	0.0857864	0.0857864	0.0857864
	q	0.707107	0.707107	0.5	0.5	0.5
Sum over Locus101				0.585786	0.585786	0.585786	8	0.526613	4	0.447715
Locus102	p	0.133975	0	0.0179492	0	0
	q	0.866025	1	0.75	1	0.866025
Sum over Locus102				0.767949	1	0.866025	8	0.734799	4	1
Locus103	p	0	0	0	0	0
	q	1	1	1	1	1
Sum over Locus103				1	1	1	8	1	4	1
Locus104	p	0.133975	0	0.0179492	0	0
	q	0.866025	1	0.75	1	0.866025
Sum over Locus104				0.767949	1	0.866025	8	0.734799	4	1
Locus105	p	0	0	0	0	0
	q	1	1	1	1	1
Sum over Locus105				1	1	1	8	1	4	1
Locus106	p	0.133975	0	0.0179492	0	0
	q	0.866025	1	0.75	1	0.866025
Sum over Locus106				0.767949	1	0.866025	8	0.734799	4	1
Locus107	p	0.133975	0.292893	0.0179492	0.0857864	0.0392403
	q	0.866025	0.707107	0.75	0.5	0.612372
Sum over Locus107				0.767949	0.585786	0.651613	8	0.734799	4	0.447715
Locus108	p	0.133975	0	0.0179492	0	0
	q	0.866025	1	0.75	1	0.866025
Sum over Locus108				0.767949	1	0.866025	8	0.734799	4	1
Locus109	p	0.292893	1	0.0857864	1	0.292893
	q	0.707107	0	0.5	0	0
Sum over Locus109				0.585786	1	0.292893	8	0.526613	4	1
Locus110	p	0.133975	0	0.0179492	0	0
	q	0.866025	1	0.75	1	0.866025
Sum over Locus110				0.767949	1	0.866025	8	0.734799	4	1
Locus111	p	0.133975	0	0.0179492	0	0
	q	0.866025	1	0.75	1	0.866025
Sum over Locus111				0.767949	1	0.866025	8	0.734799	4	1
Locus112	p	0	0	0	0	0
	q	1	1	1	1	1
Sum over Locus112				1	1	1	8	1	4	1
Locus113	p	0	0	0	0	0
	q	1	1	1	1	1
Sum over Locus113				1	1	1	8	1	4	1
Locus114	p	0	0	0	0	0
	q	1	1	1	1	1
Sum over Locus114				1	1	1	8	1	4	1
Locus115	p	0	0	0	0	0
	q	1	1	1	1	1
Sum over Locus115				1	1	1	8	1	4	1
Locus116	p	0.292893	1	0.0857864	1	0.292893
	q	0.707107	0	0.5	0	0
Sum over Locus116				0.585786	1	0.292893	8	0.526613	4	1
Locus117	p	0.133975	0	0.0179492	0	0
	q	0.866025	1	0.75	1	0.866025
Sum over Locus117				0.767949	1	0.866025	8	0.734799	4	1
Locus118	p	0	0	0	0	0
	q	1	1	1	1	1
Sum over Locus118				1	1	1	8	1	4	1
Locus119	p	0.133975	0	0.0179492	0	0
	q	0.866025	1	0.75	1	0.866025
Sum over Locus119				0.767949	1	0.866025	8	0.734799	4	1
Locus120	p	0	0	0	0	0
	q	1	1	1	1	1
Sum over Locus120				1	1	1	8	1	4	1
Locus121	p	0.133975	0	0.0179492	0	0
	q	0.866025	1	0.75	1	0.866025
Sum over Locus121				0.767949	1	0.866025	8	0.734799	4	1
Locus122	p	0.5	1	0.25	1	0.5
	q	0.5	0	0.25	0	0
Sum over Locus122				0.5	1	0.5	8	0.428571	4	1
Locus123	p	0.292893	0.292893	0.0857864	0.0857864	0.0857864
	q	0.707107	0.707107	0.5	0.5	0.5
Sum over Locus123				0.585786	0.585786	0.585786	8	0.526613	4	0.447715
Locus124	p	0.5	1	0.25	1	0.5
	q	0.5	0	0.25	0	0
Sum over Locus124				0.5	1	0.5	8	0.428571	4	1
Locus125	p	1	1	1	1	1
	q	0	0	0	0	0
Sum over Locus125				1	1	1	8	1	4	1
Locus126	p	0.5	0.292893	0.25	0.0857864	0.146447
	q	0.5	0.707107	0.25	0.5	0.353553
Sum over Locus126				0.5	0.585786	0.5	8	0.428571	4	0.447715
Locus127	p	0	0	0	0	0
	q	1	1	1	1	1
Sum over Locus127				1	1	1	8	1	4	1
Locus128	p	0.133975	0.292893	0.0179492	0.0857864	0.0392403
	q	0.866025	0.707107	0.75	0.5	0.612372
Sum over Locus128				0.767949	0.585786	0.651613	8	0.734799	4	0.447715
Locus129	p	1	1	1	1	1
	q	0	0	0	0	0
Sum over Locus129				1	1	1	8	1	4	1
Locus130	p	0.133975	0	0.0179492	0	0
	q	0.866025	1	0.75	1	0.866025
Sum over Locus130				0.767949	1	0.866025	8	0.734799	4	1
Locus131	p	1	1	1	1	1
	q	0	0	0	0	0
Sum over Locus131				1	1	1	8	1	4	1
Locus132	p	1	1	1	1	1
	q	0	0	0	0	0
Sum over Locus132				1	1	1	8	1	4	1
Locus133	p	0.133975	0	0.0179492	0	0
	q	0.866025	1	0.75	1	0.866025
Sum over Locus133				0.767949	1	0.866025	8	0.734799	4	1
Locus134	p	0.133975	0.292893	0.0179492	0.0857864	0.0392403
	q	0.866025	0.707107	0.75	0.5	0.612372
Sum over Locus134				0.767949	0.585786	0.651613	8	0.734799	4	0.447715
Locus135	p	0.133975	0	0.0179492	0	0
	q	0.866025	1	0.75	1	0.866025
Sum over Locus135				0.767949	1	0.866025	8	0.734799	4	1
Locus136	p	0.133975	0	0.0179492	0	0
	q	0.866025	1	0.75	1	0.866025
Sum over Locus136				0.767949	1	0.866025	8	0.734799	4	1
Locus137	p	0	0	0	0	0
	q	1	1	1	1	1
Sum over Locus137				1	1	1	8	1	4	1
Locus138	p	0.5	1	0.25	1	0.5
	q	0.5	0	0.25	0	0
Sum over Locus138				0.5	1	0.5	8	0.428571	4	1
Locus139	p	0.292893	1	0.0857864	1	0.292893
	q	0.707107	0	0.5	0	0
Sum over Locus139				0.585786	1	0.292893	8	0.526613	4	1
Locus140	p	0.5	1	0.25	1	0.5
	q	0.5	0	0.25	0	0
Sum over Locus140				0.5	1	0.5	8	0.428571	4	1
Locus141	p	0.292893	1	0.0857864	1	0.292893
	q	0.707107	0	0.5	0	0
Sum over Locus141				0.585786	1	0.292893	8	0.526613	4	1
Locus142	p	0.133975	0	0.0179492	0	0
	q	0.866025	1	0.75	1	0.866025
Sum over Locus142				0.767949	1	0.866025	8	0.734799	4	1
Locus143	p	0.292893	0	0.0857864	0	0
	q	0.707107	1	0.5	1	0.707107
Sum over Locus143				0.585786	1	0.707107	8	0.526613	4	1
Locus144	p	0.292893	0	0.0857864	0	0
	q	0.707107	1	0.5	1	0.707107
Sum over Locus144				0.585786	1	0.707107	8	0.526613	4	1
Locus145	p	0	0	0	0	0
	q	1	1	1	1	1
Sum over Locus145				1	1	1	8	1	4	1
Locus146	p	0.133975	0	0.0179492	0	0
	q	0.866025	1	0.75	1	0.866025
Sum over Locus146				0.767949	1	0.866025	8	0.734799	4	1
Locus147	p	0.133975	0	0.0179492	0	0
	q	0.866025	1	0.75	1	0.866025
Sum over Locus147				0.767949	1	0.866025	8	0.734799	4	1
Locus148	p	1	1	1	1	1
	q	0	0	0	0	0
Sum over Locus148				1	1	1	8	1	4	1
Locus149	p	1	1	1	1	1
	q	0	0	0	0	0
Sum over Locus149				1	1	1	8	1	4	1
Locus150	p	0.292893	0.292893	0.0857864	0.0857864	0.0857864
	q	0.707107	0.707107	0.5	0.5	0.5
Sum over Locus150				0.585786	0.585786	0.585786	8	0.526613	4	0.447715
Locus151	p	0.133975	0	0.0179492	0	0
	q	0.866025	1	0.75	1	0.866025
Sum over Locus151				0.767949	1	0.866025	8	0.734799	4	1
Locus152	p	0.5	1	0.25	1	0.5
	q	0.5	0	0.25	0	0
Sum over Locus152				0.5	1	0.5	8	0.428571	4	1
Locus153	p	0.133975	0.292893	0.0179492	0.0857864	0.0392403
	q	0.866025	0.707107	0.75	0.5	0.612372
Sum over Locus153				0.767949	0.585786	0.651613	8	0.734799	4	0.447715
Locus154	p	0.133975	0.292893	0.0179492	0.0857864	0.0392403
	q	0.866025	0.707107	0.75	0.5	0.612372
Sum over Locus154				0.767949	0.585786	0.651613	8	0.734799	4	0.447715
Locus155	p	0.133975	0	0.0179492	0	0
	q	0.866025	1	0.75	1	0.866025
Sum over Locus155				0.767949	1	0.866025	8	0.734799	4	1
Locus156	p	0.292893	0.292893	0.0857864	0.0857864	0.0857864
	q	0.707107	0.707107	0.5	0.5	0.5
Sum over Locus156				0.585786	0.585786	0.585786	8	0.526613	4	0.447715
Locus157	p	0	0	0	0	0
	q	1	1	1	1	1
Sum over Locus157				1	1	1	8	1	4	1
Locus158	p	0	0.292893	0	0.0857864	0
	q	1	0.707107	1	0.5	0.707107
Sum over Locus158				1	0.585786	0.707107	8	1	4	0.447715
Locus159	p	0	0	0	0	0
	q	1	1	1	1	1
Sum over Locus159				1	1	1	8	1	4	1
Locus160	p	0.292893	0	0.0857864	0	0
	q	0.707107	1	0.5	1	0.707107
Sum over Locus160				0.585786	1	0.707107	8	0.526613	4	1
Locus161	p	0.133975	0	0.0179492	0	0
	q	0.866025	1	0.75	1	0.866025
Sum over Locus161				0.767949	1	0.866025	8	0.734799	4	1
Locus162	p	0.133975	0	0.0179492	0	0
	q	0.866025	1	0.75	1	0.866025
Sum over Locus162				0.767949	1	0.866025	8	0.734799	4	1
Locus163	p	0.133975	0	0.0179492	0	0
	q	0.866025	1	0.75	1	0.866025
Sum over Locus163				0.767949	1	0.866025	8	0.734799	4	1
Locus164	p	1	1	1	1	1
	q	0	0	0	0	0
Sum over Locus164				1	1	1	8	1	4	1
Locus165	p	0.133975	0	0.0179492	0	0
	q	0.866025	1	0.75	1	0.866025
Sum over Locus165				0.767949	1	0.866025	8	0.734799	4	1
				Jx	Jy	JxJy		JxUb		JyUb
Sum over Loci				127.728	153.816	122.801		122.404		150.088
	JxJy	(Jx*Jy)^0.5)		JxJy / ((Jx *Jy)^0.5)			(JxUb*JyUb)^0.5)		JxJy / ((JxUb* JyUb)^0.5)
	122.801	140.167		0.87611			135.541		0.906009
Nei Genetic Identity	0.87611
Nei Unbiased Genetic Identity	0.906009
Nei Genetic Distance	0.132263
Nei Unbiased Genetic Distance	0.098706
Where x represents the allele frequencies in pop1. y represents the allele frequencies in pop 2.
xUb and yUb are calculated each locus as: xUb = (2Nx * Sum x^2-1) / (2Nx - 1); yUb=(2Ny * Sum y^2-1) / (2Ny - 1)
Jx is the sum of x^2 over loci. Jy is the sum of y^2 over loci. JxJy is the sum of xy over loci. JxUb is the sum of xUb over loci. JyUb is the sum of yUb over loci.
Nei Genetic Identity = JxJy / (Jx * Jy)^0.5. Nei Unbiased Genetic Identity = Jxy / (JxUb * JyUb)^0.5
Nei Genetic Distance = -1 * Ln(Nei Identity). Nei Unbiased Genetic Distance = -1 * Ln(Nei Unbiased Identity).

## Sheet: NeiP
1	3
Random binary data with XY coords	Лист1	Pairwise Population Matrix of Nei Genetic Distance
1000 m	1000-2000 m	above 2000 m
0			1000 m
0.0620321	0		1000-2000 m
0.0795297	0.132263	0	above 2000 m
Random binary data with XY coords	Лист1	Pairwise Population Matrix of Nei Genetic Identity
1000 m	1000-2000 m	above 2000 m
1			1000 m
0.939853	1		1000-2000 m
0.923551	0.87611	1	above 2000 m
Warning! Results should be treated with caution given the following:
The sample size in the population 1000-2000 m is less than 5!
The sample size in the population above 2000 m is less than 5!

## Sheet: uNeiP
1	3
Random binary data with XY coords	Лист1	Pairwise Population Matrix of Nei Unbiased Genetic Distance
1000 m	1000-2000 m	above 2000 m
0			1000 m
0.0323658	0		1000-2000 m
0.0588859	0.098706	0	above 2000 m
Random binary data with XY coords	Лист1	Pairwise Population Matrix of Nei Unbiased Genetic Identity
1000 m	1000-2000 m	above 2000 m
1			1000 m
0.968152	1		1000-2000 m
0.942814	0.906009	1	above 2000 m
Warning! Results should be treated with caution given the following:
The sample size in the population 1000-2000 m is less than 5!
The sample size in the population above 2000 m is less than 5!
